# Supplementary material for: One-pot two-step synthesis of N-arylcarbazole-based skeleton
Source: Royal Society of Chemistry journal article supplement (doi:10.1039/c5ra26698j), 2016-01-01

*Supporting information for*

**One-pot two-step synthesis of N-arylcarbazole-based skeleton**

Sheng Tao, Ning Liu,\* Bin Dai\*

School of Chemistry and Chemical Engineering, Key Laboratory for Green Processing of  
Chemical Engineering of Xinjiang Bingtuan, Shihezi University, North 4th Road, Shihezi,  
Xinjiang 832003, China

*E-mail: ninglau@163.com; dbinly@126.com; Fax: +86-0993-205-7270; Tel: +86-0993-205-  
7157*

**Contents**

|                                         |        |
|-----------------------------------------|--------|
| NMR Spectra for Cross-Coupling Products | S2-S29 |
|-----------------------------------------|--------|

# NMR Spectra for all Cross-Coupling Products

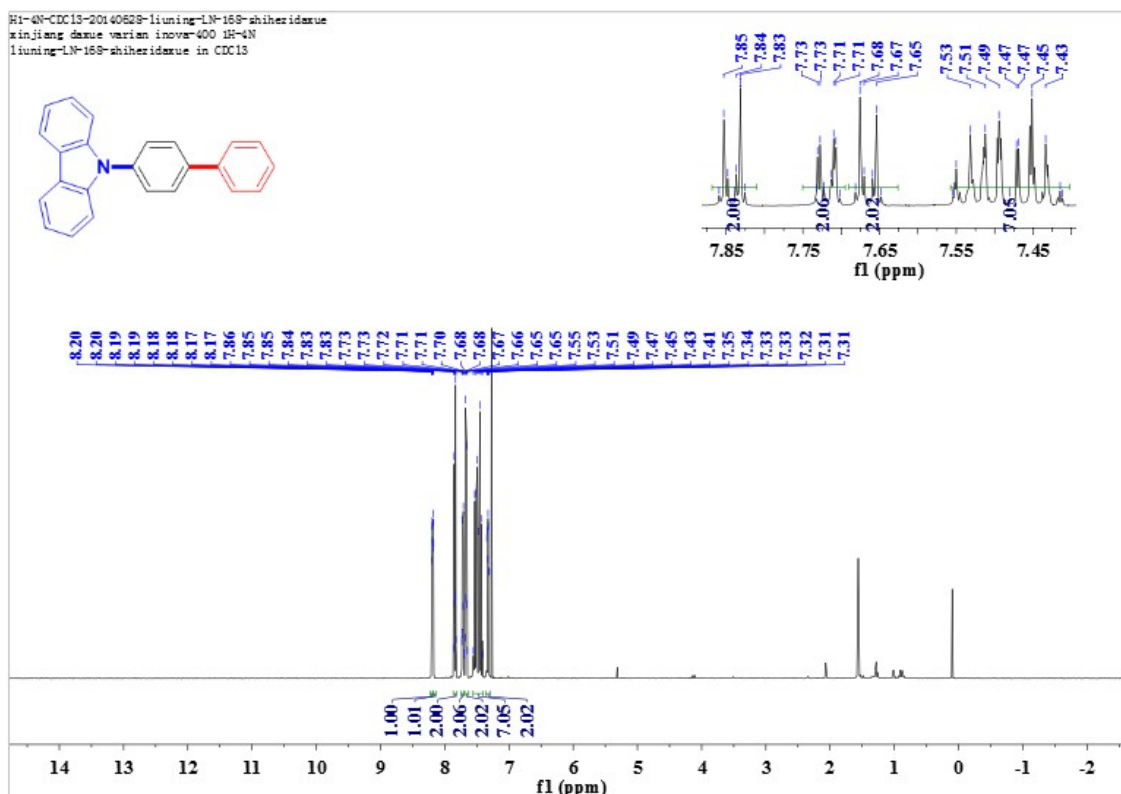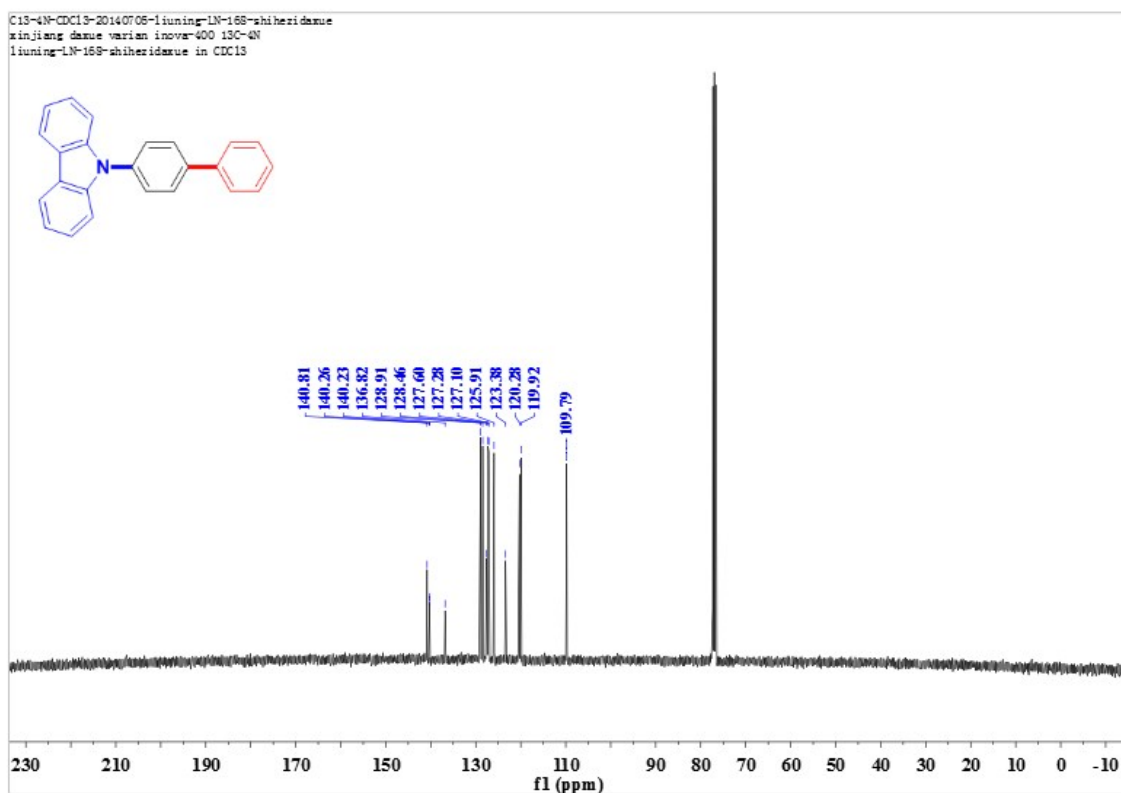

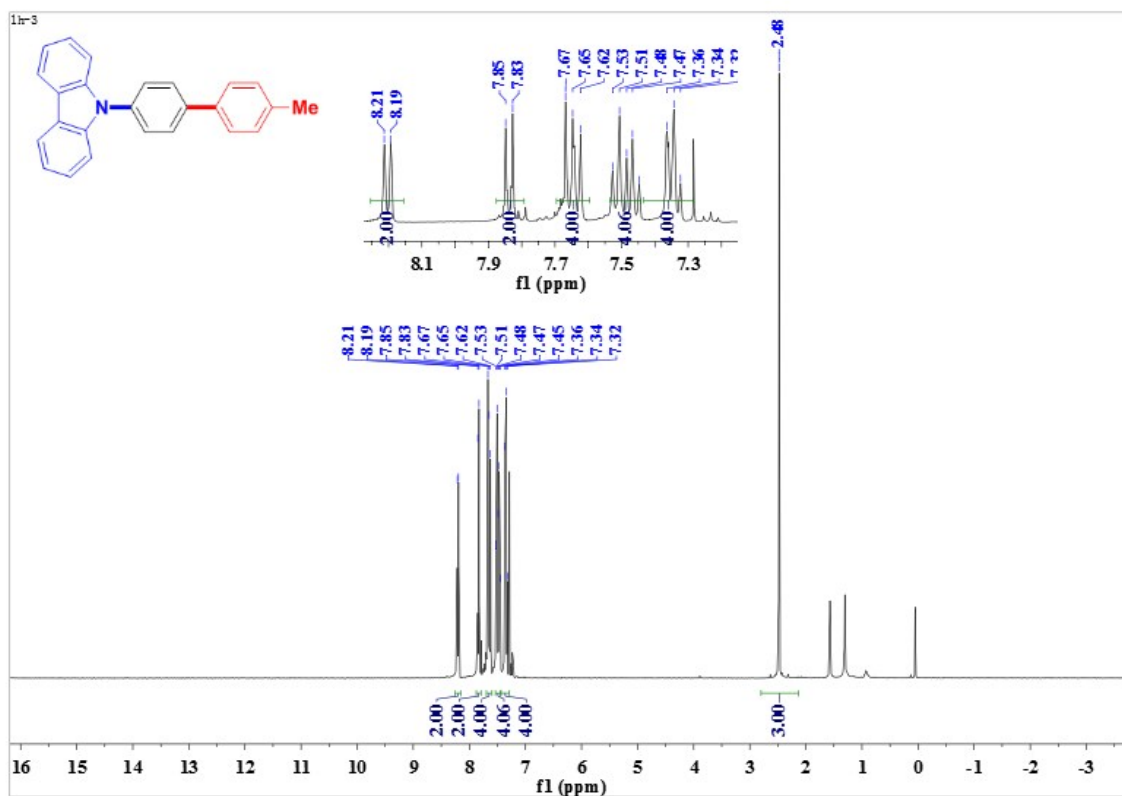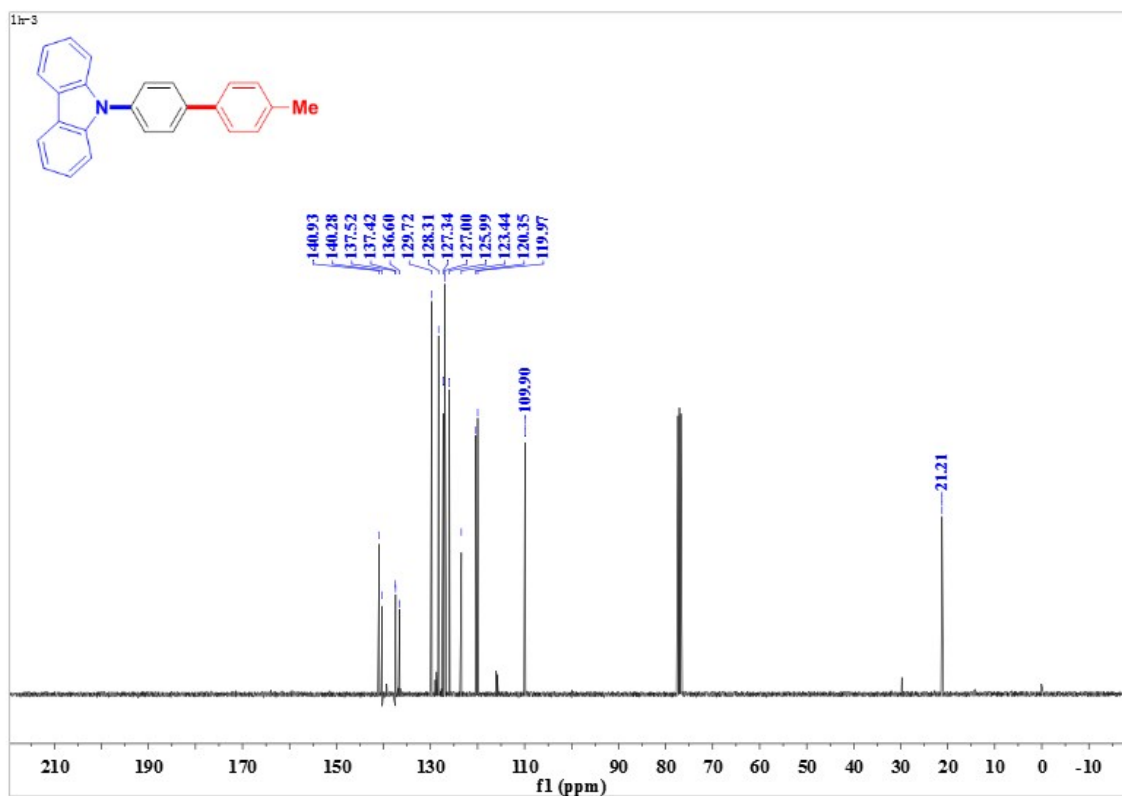

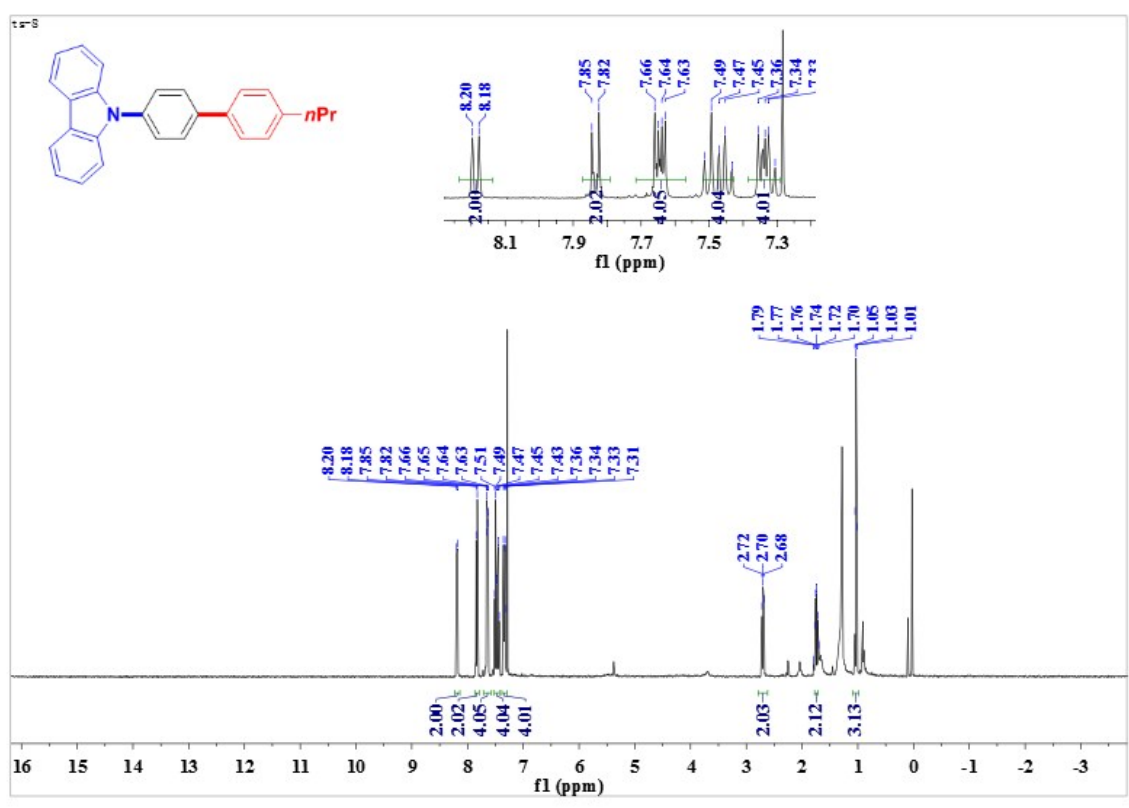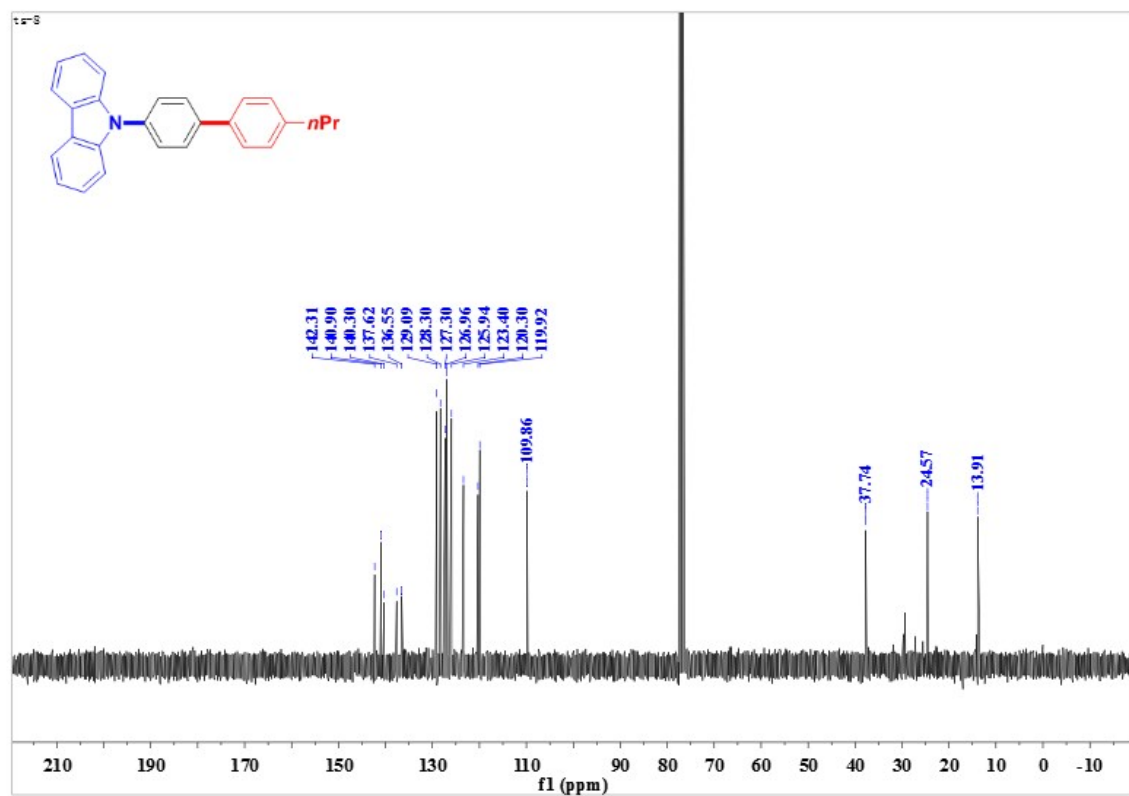

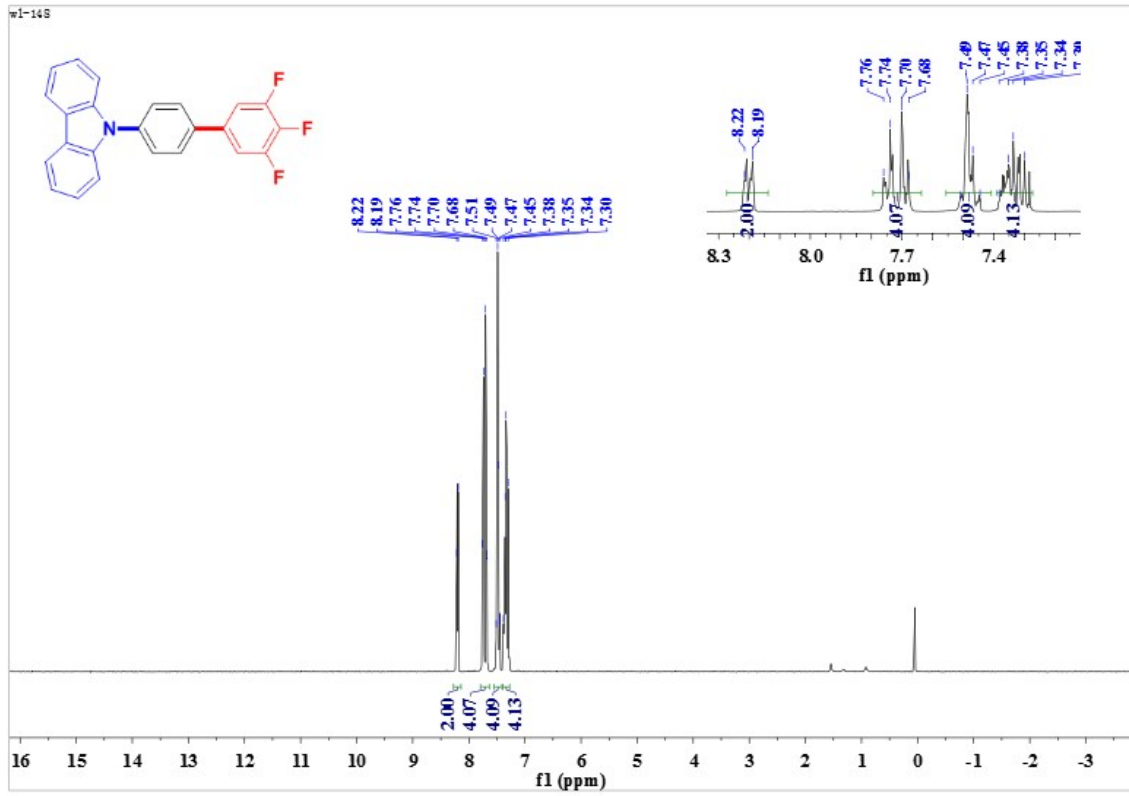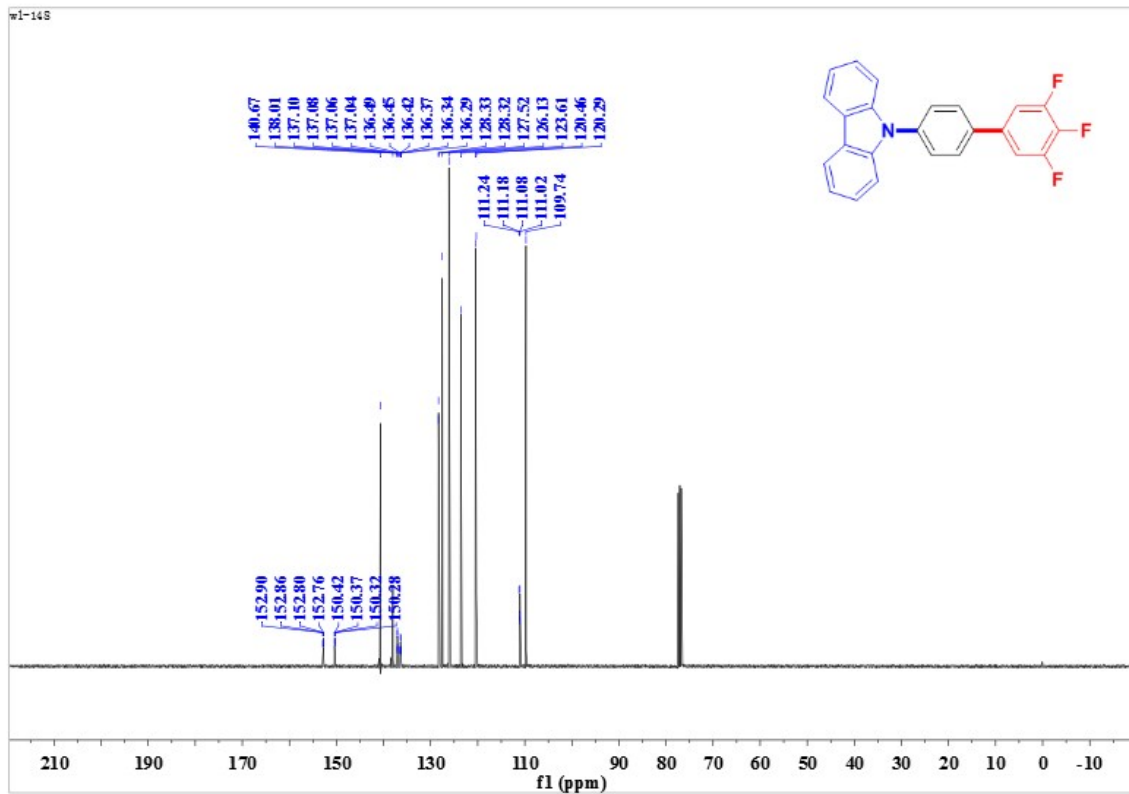

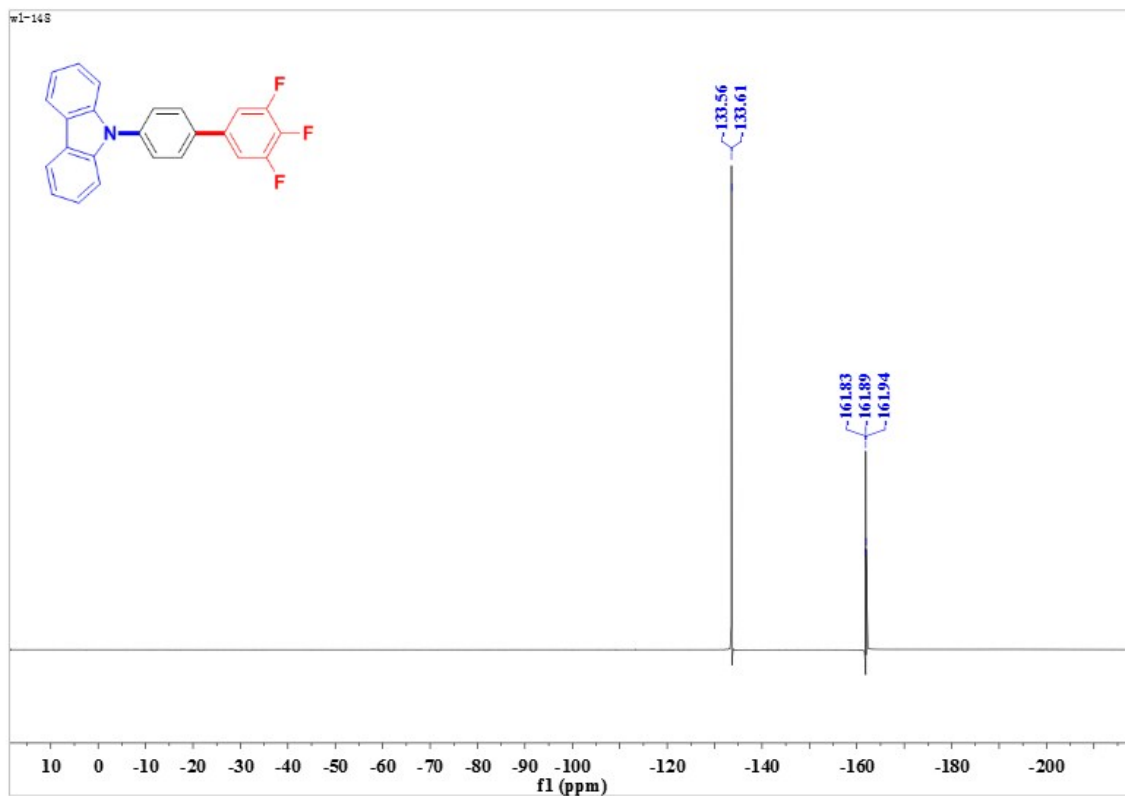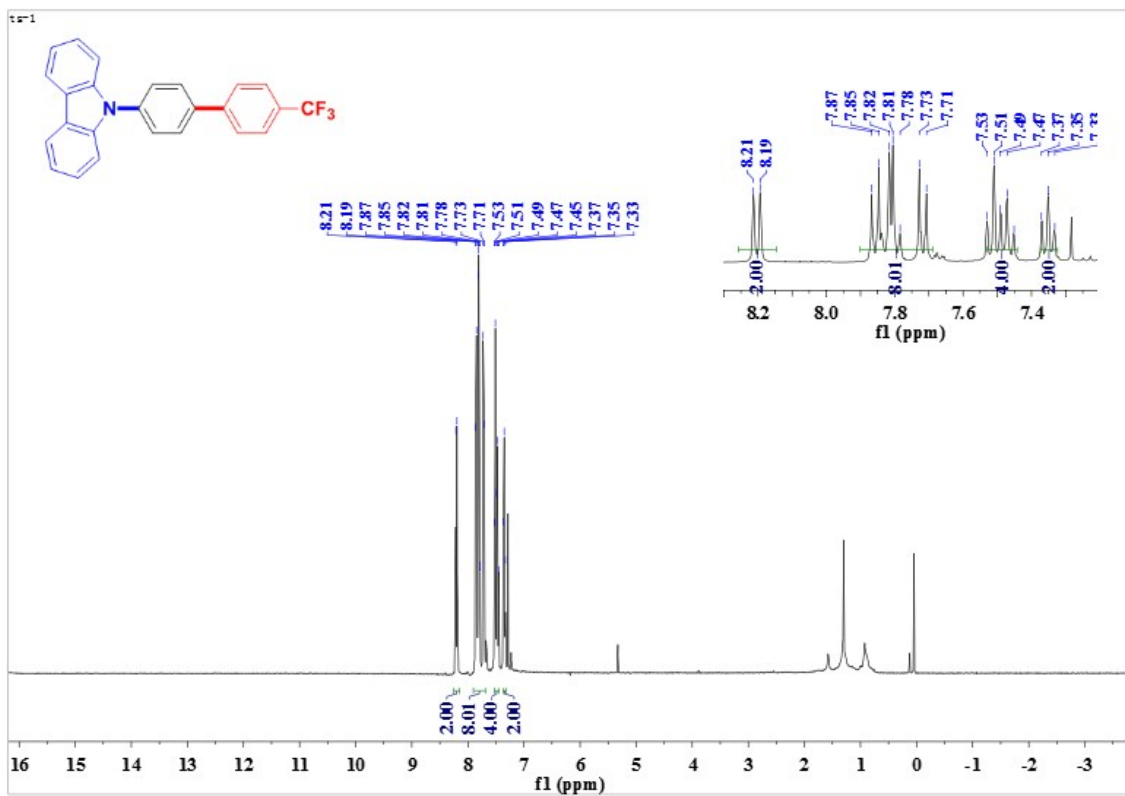

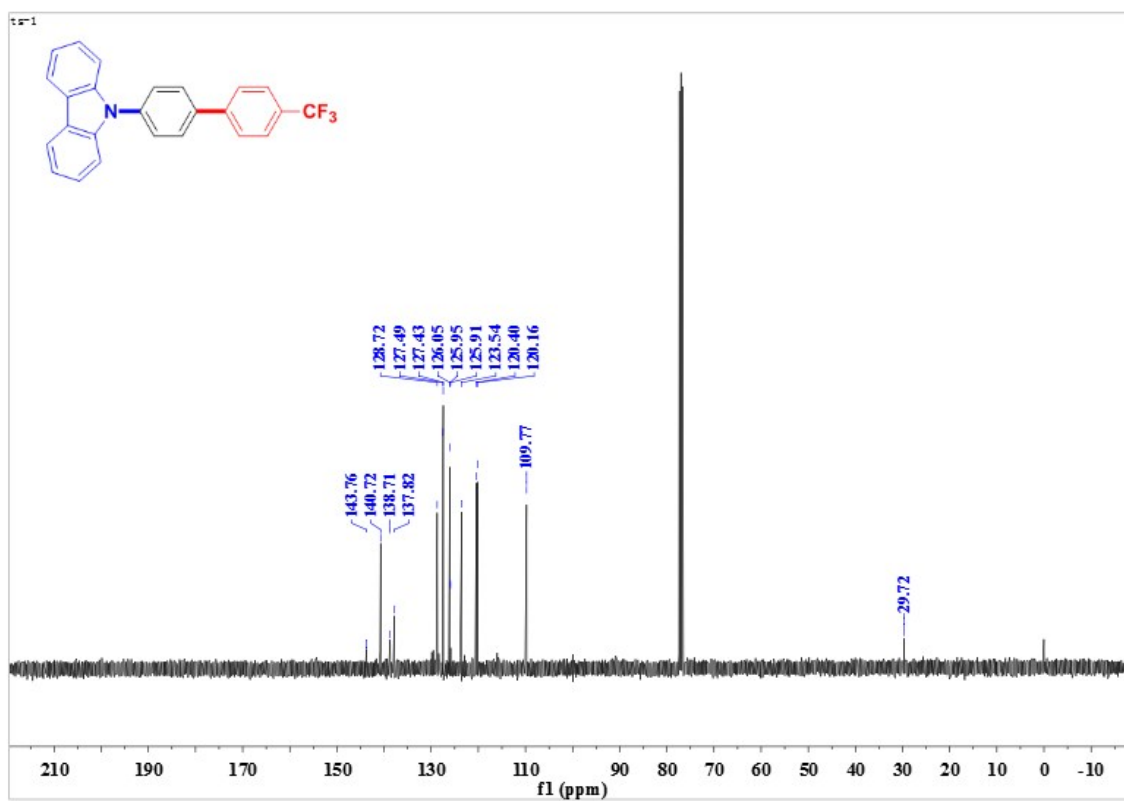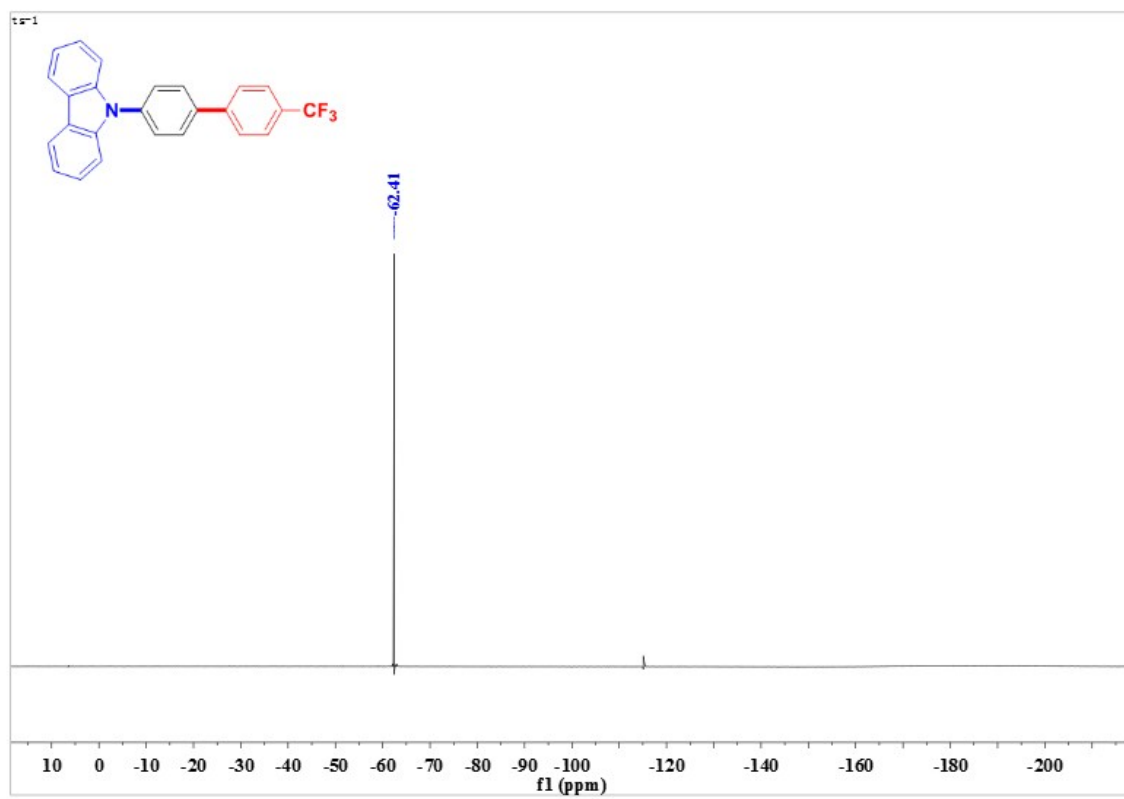

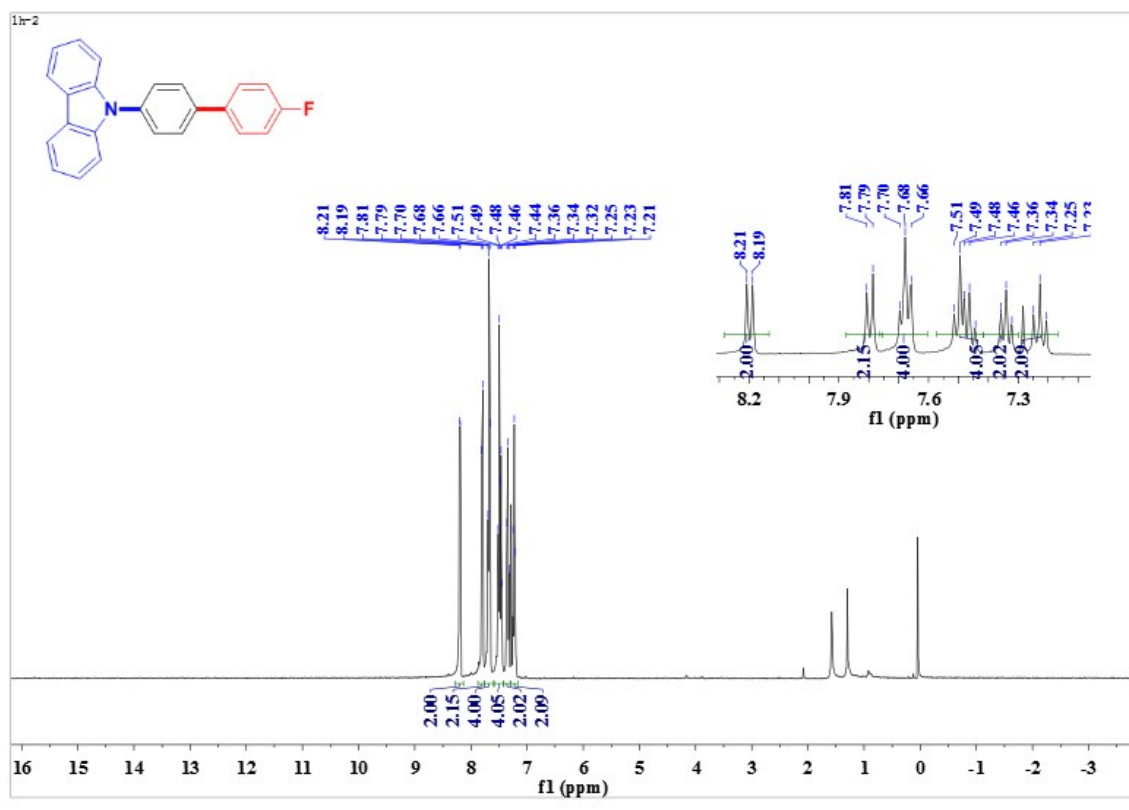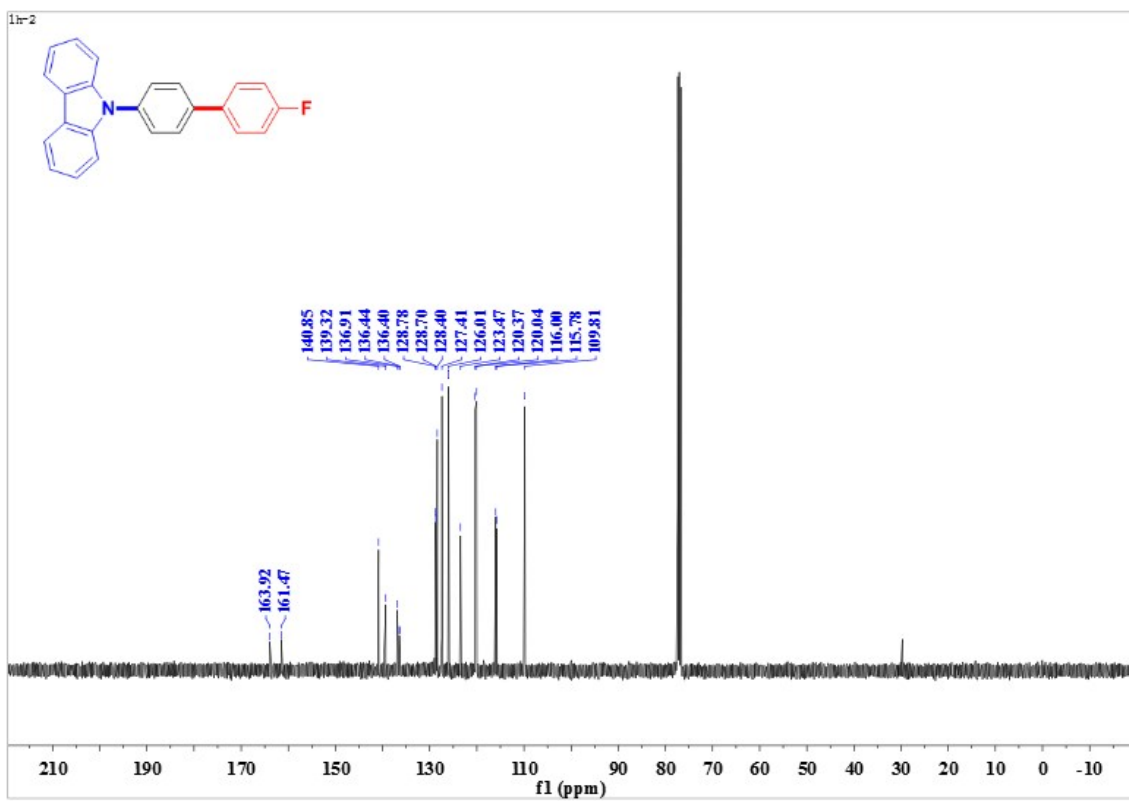



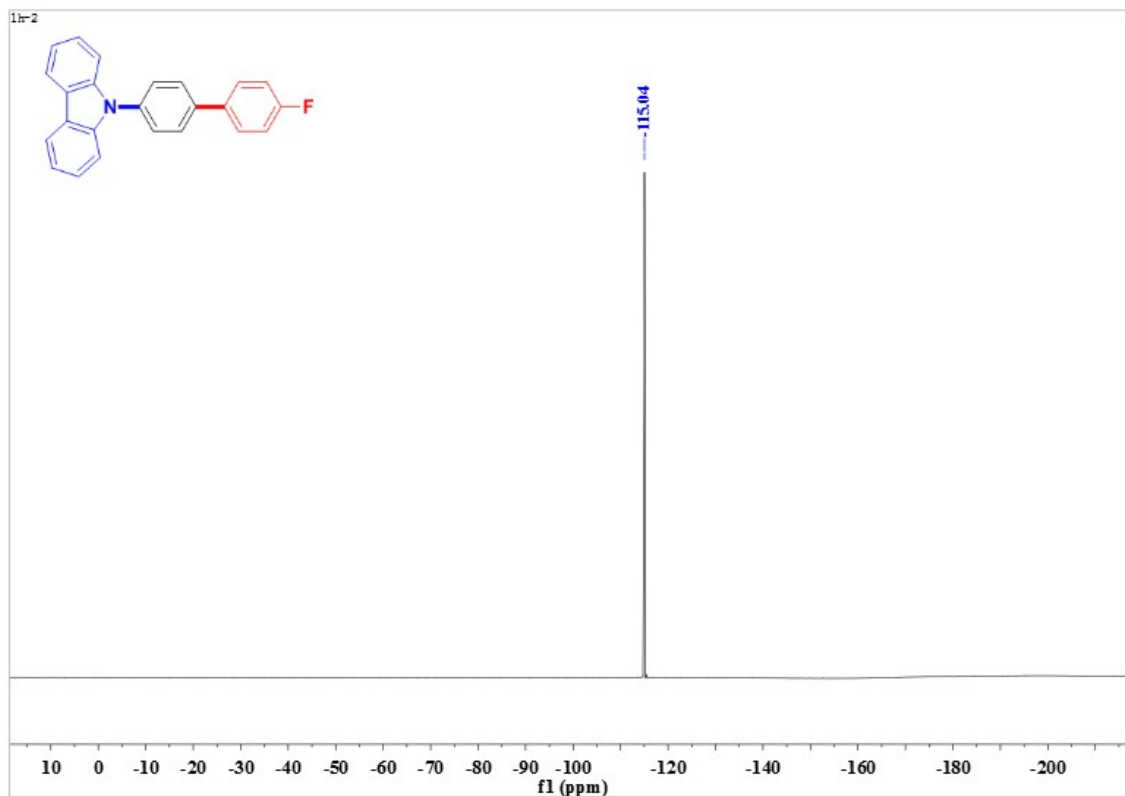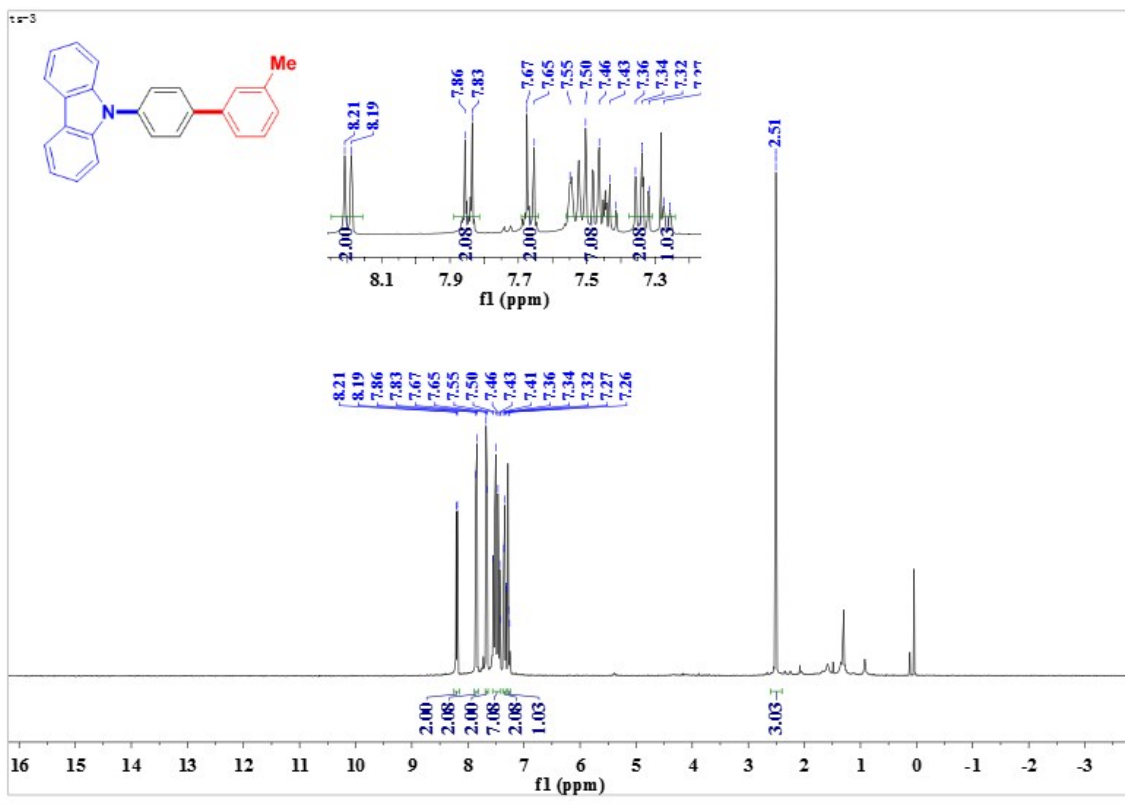

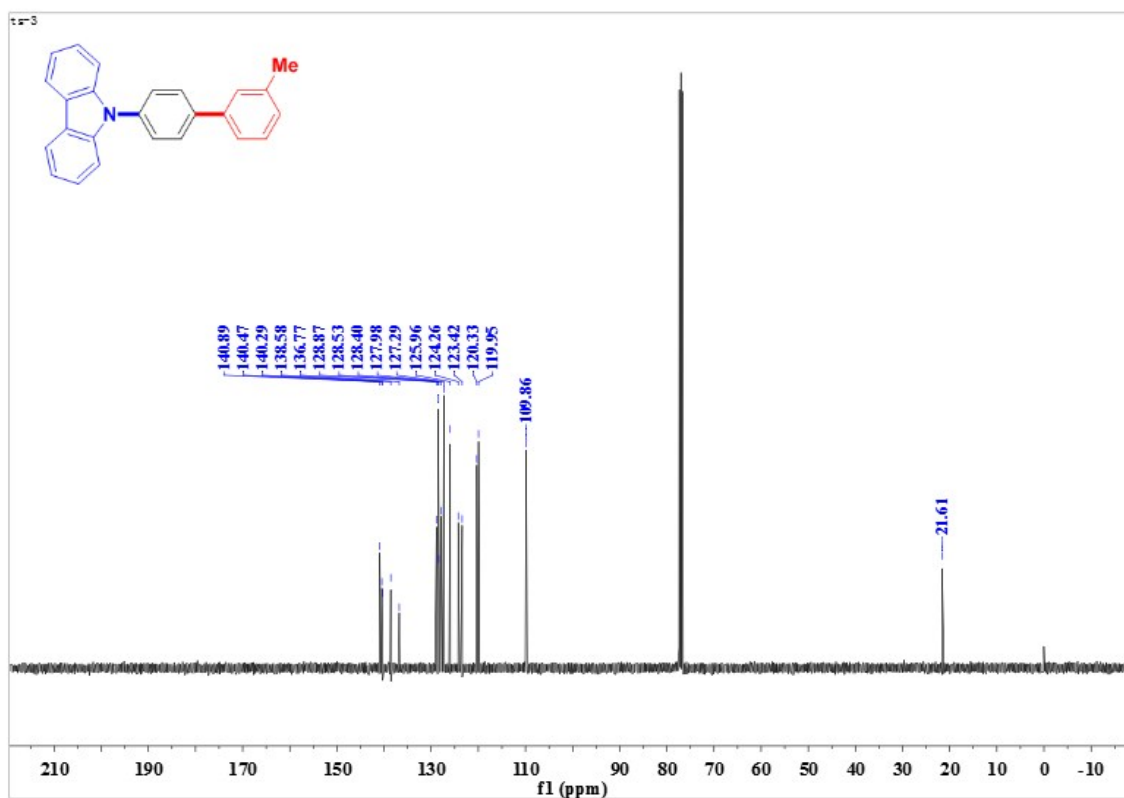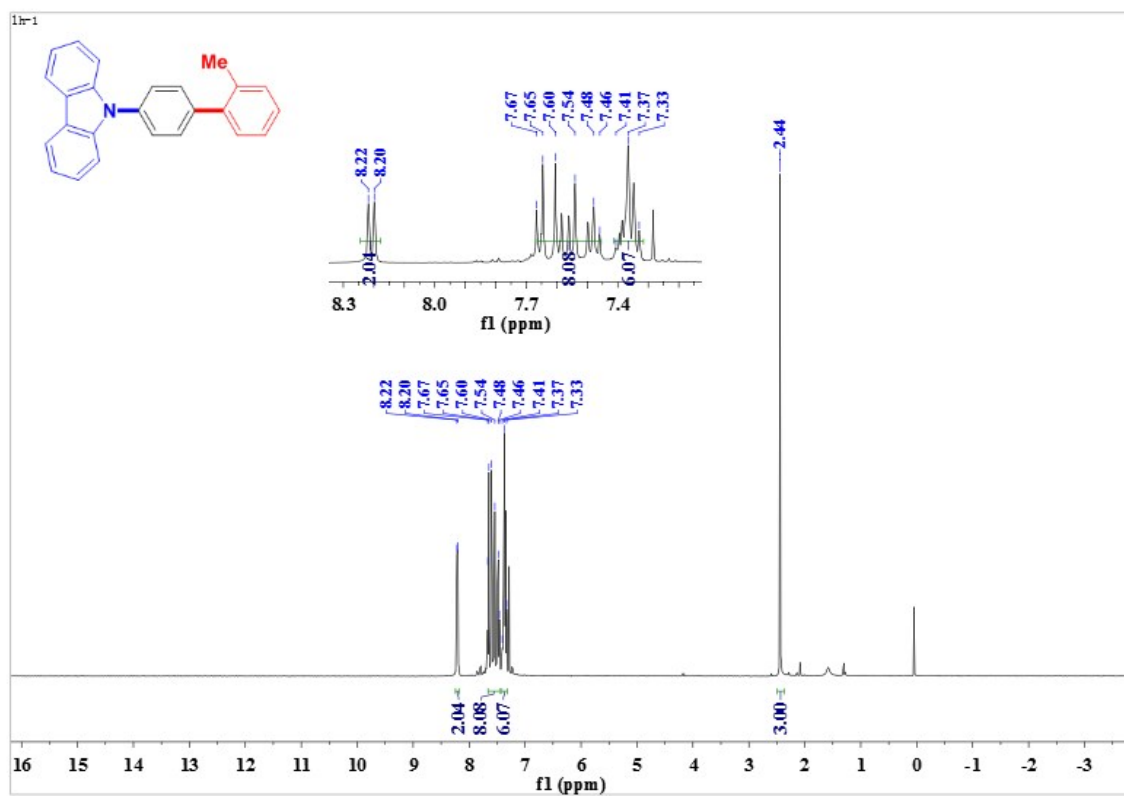

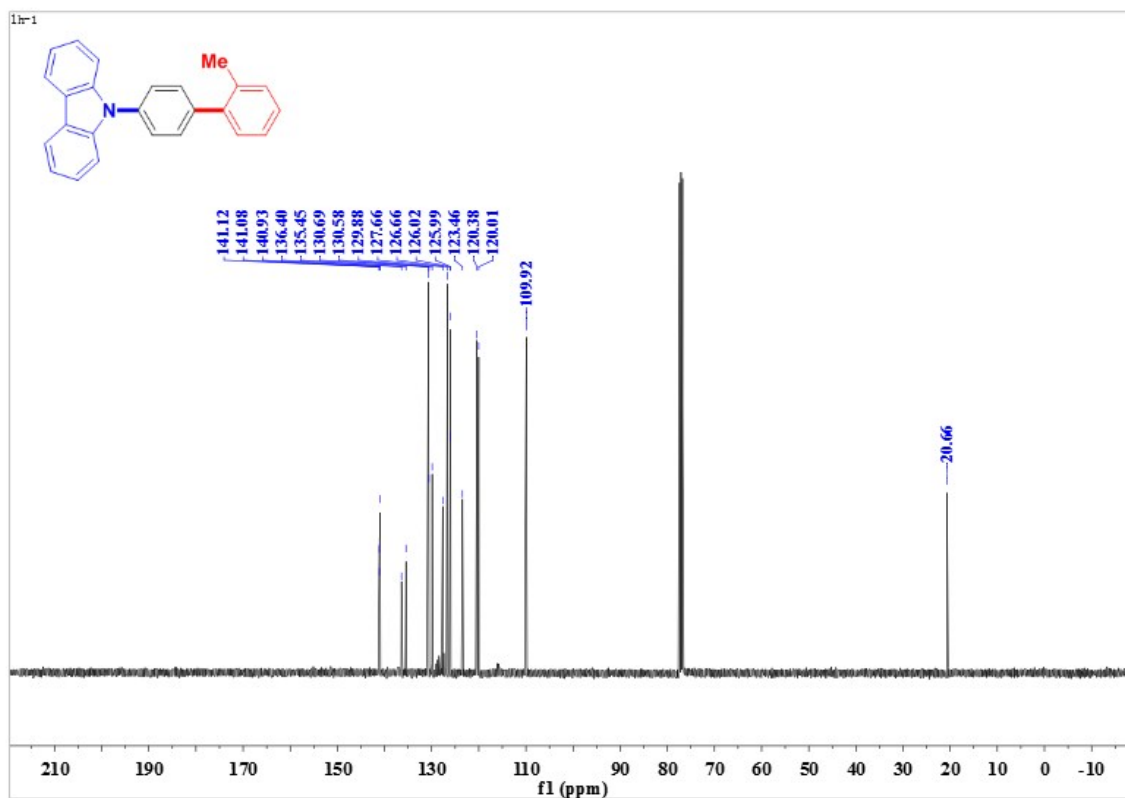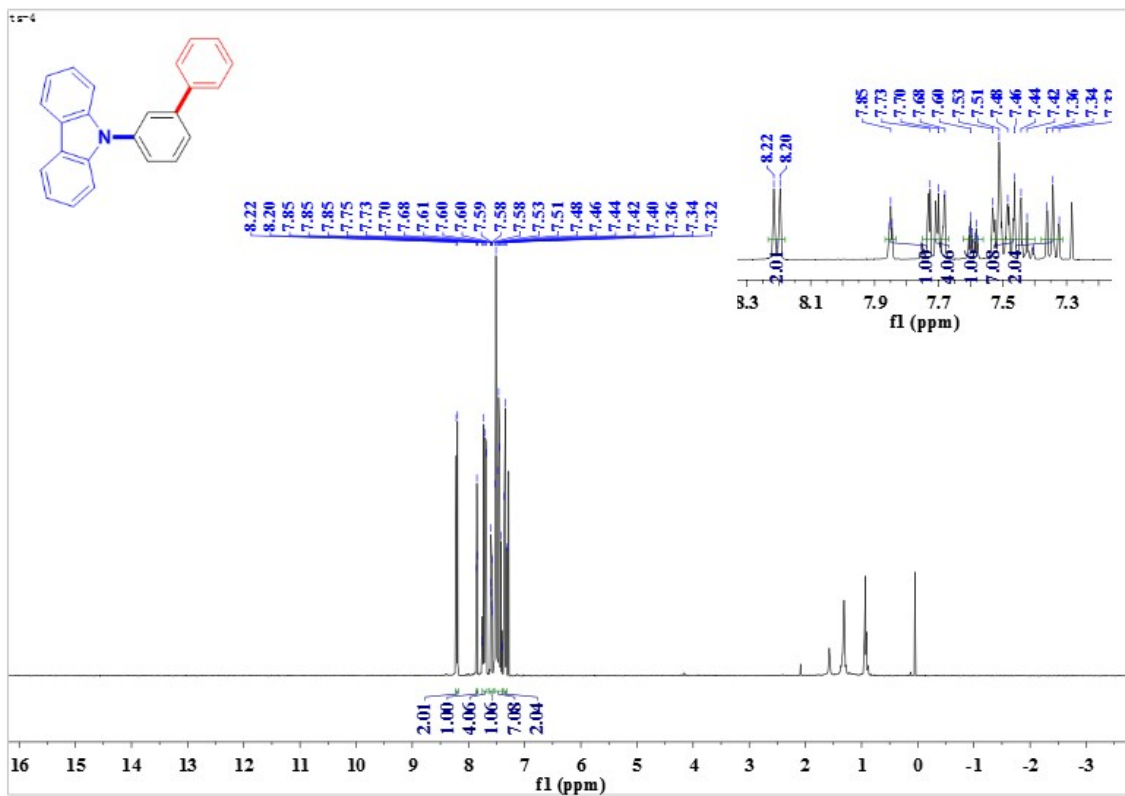

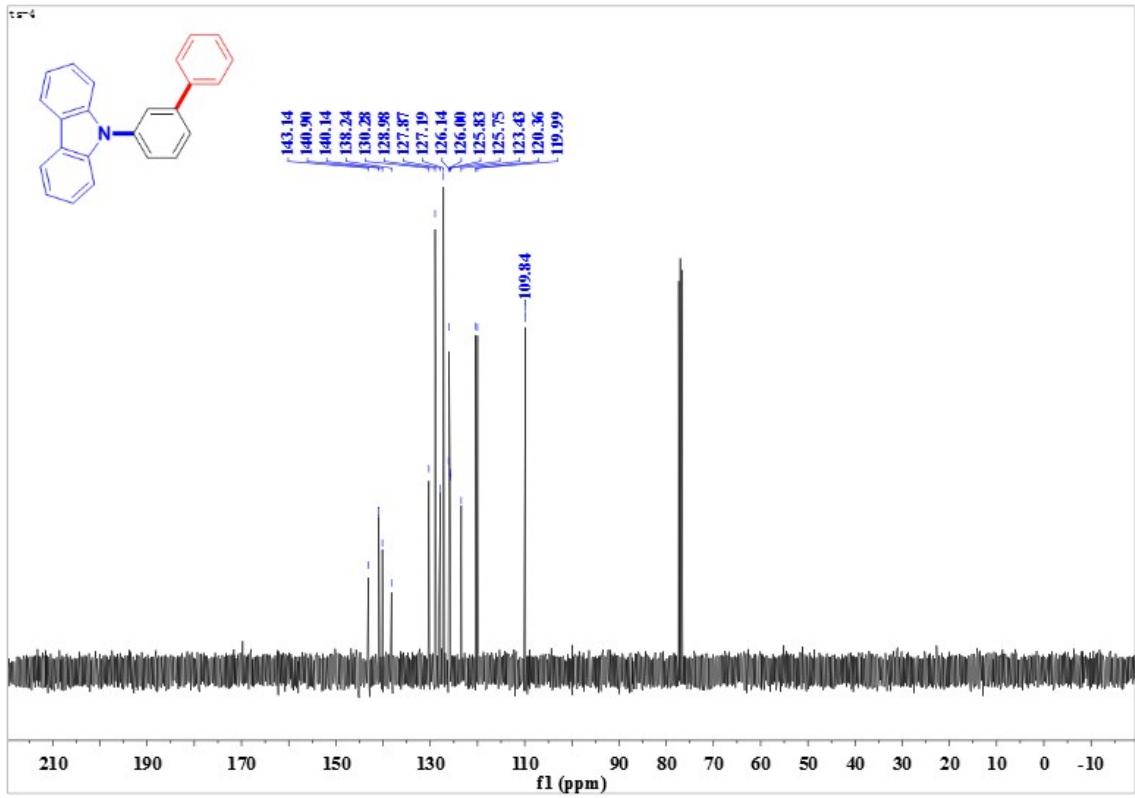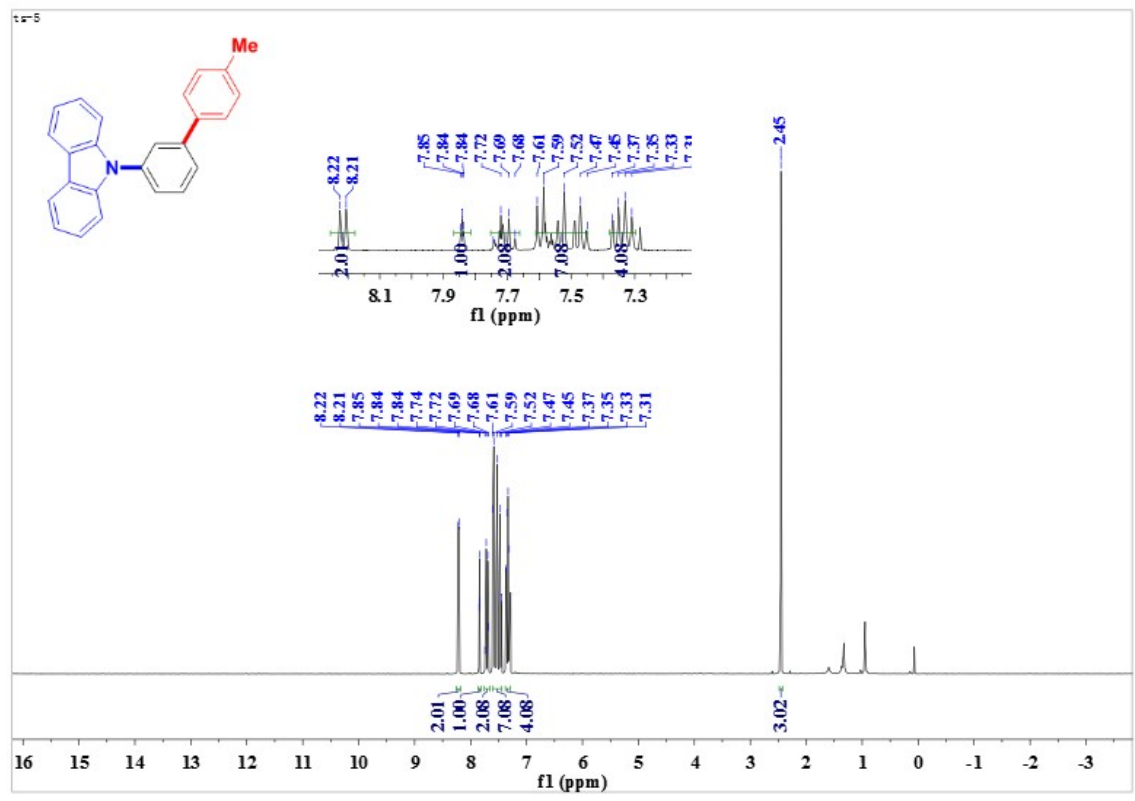

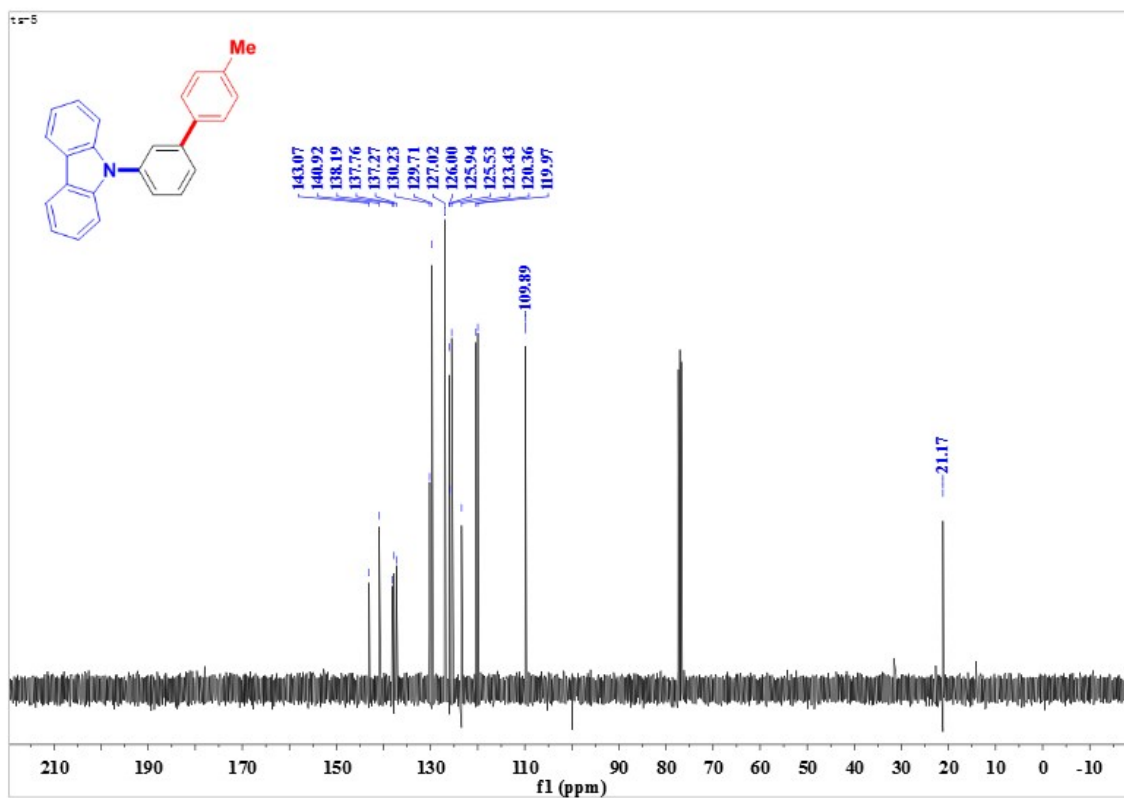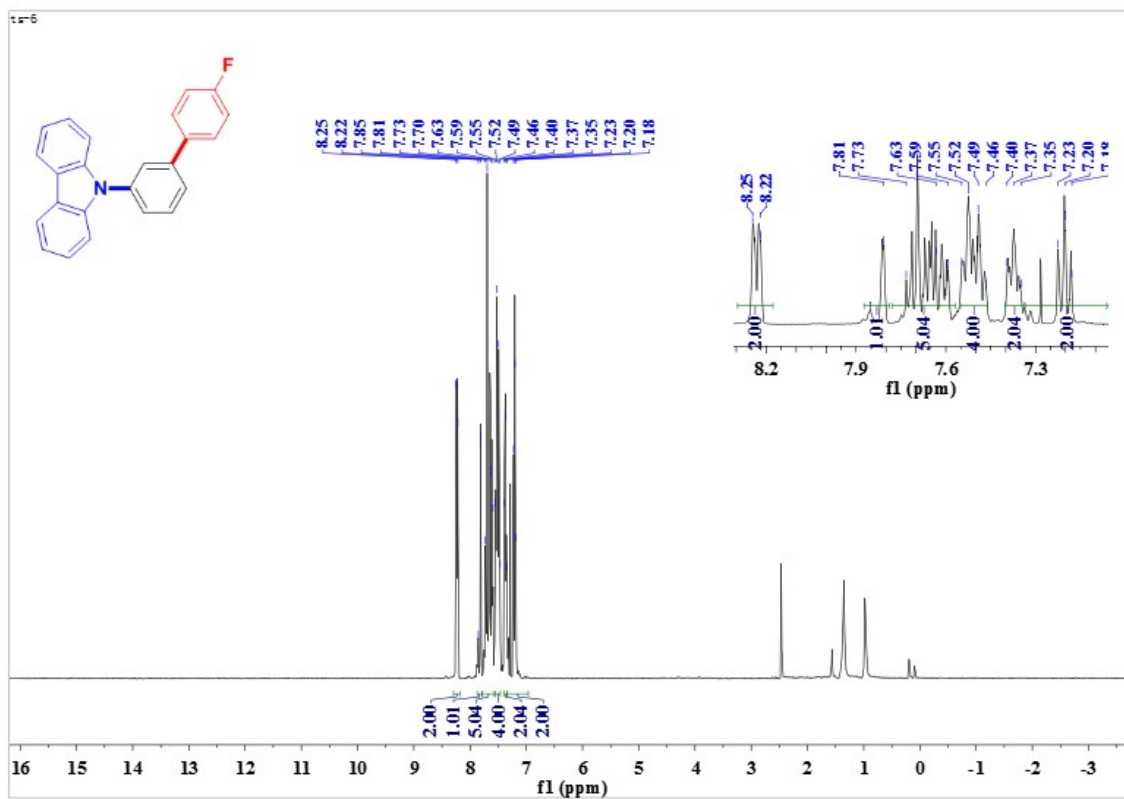

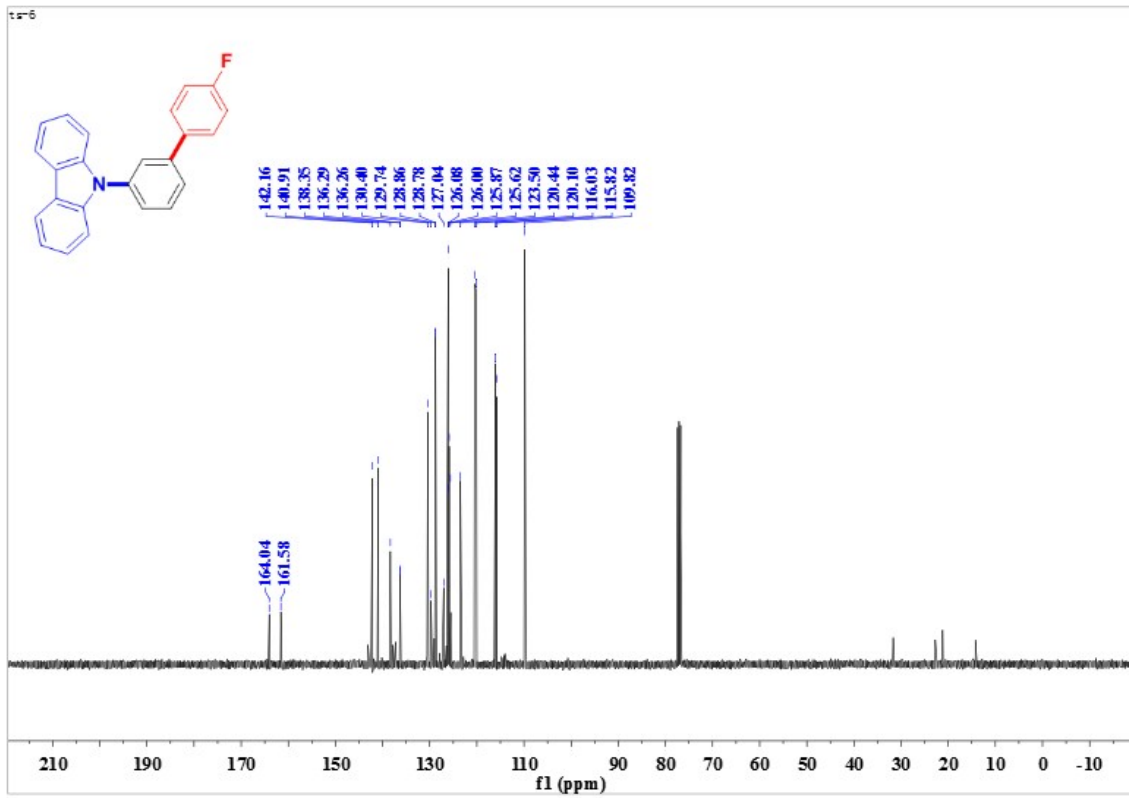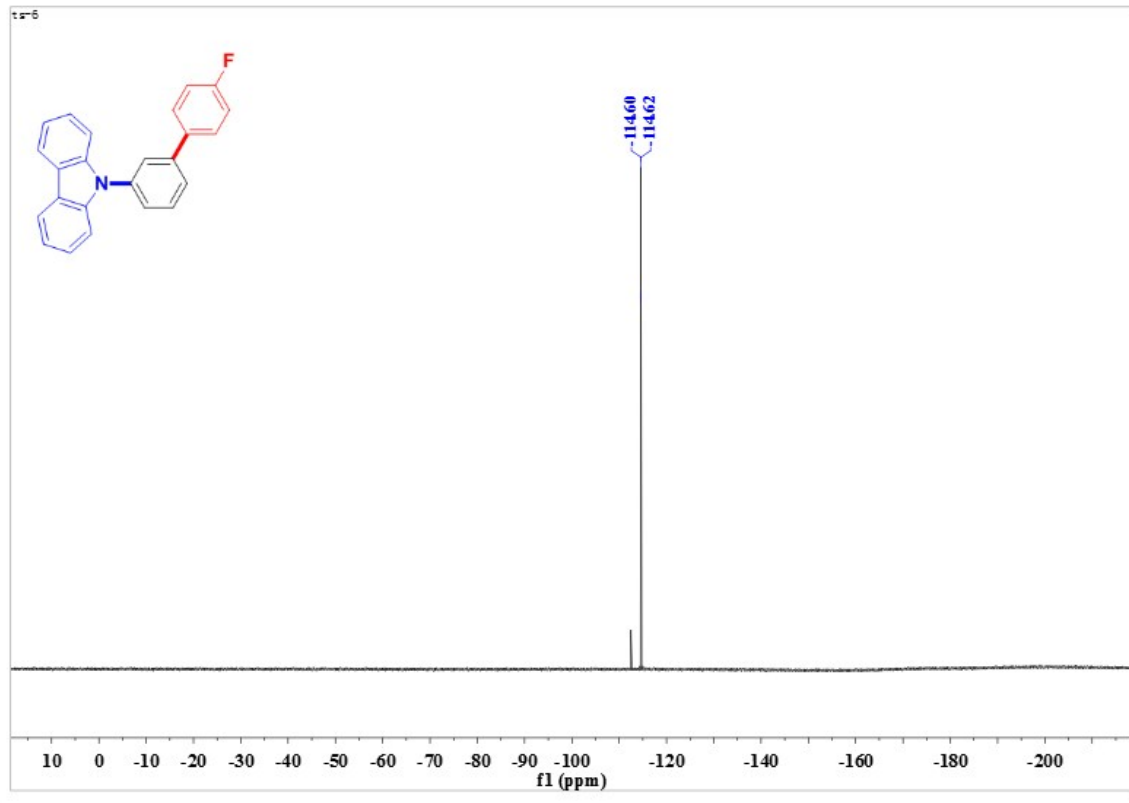

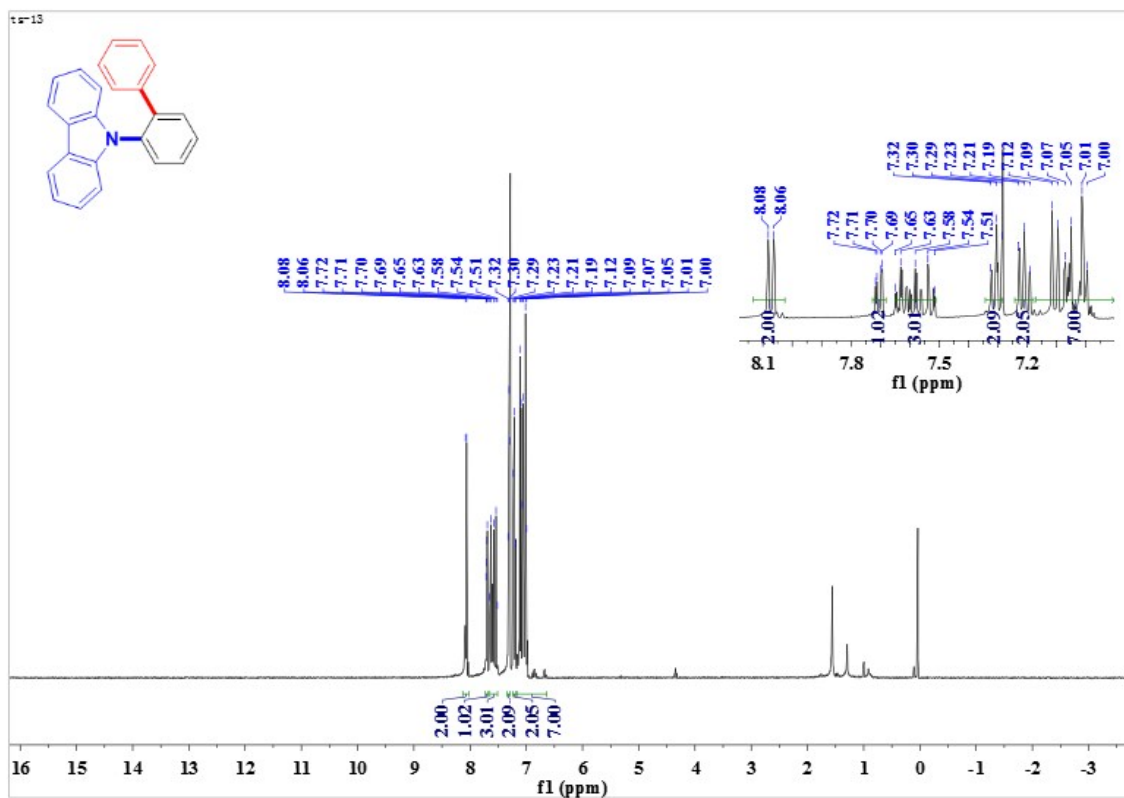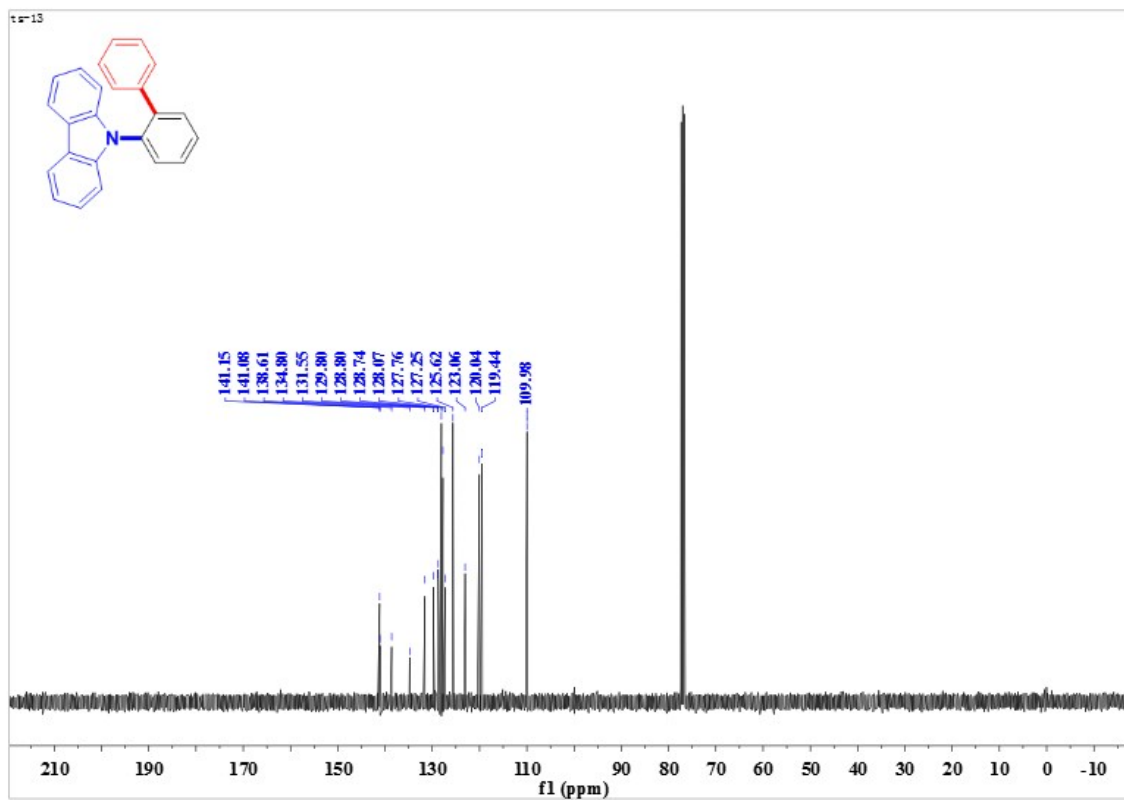

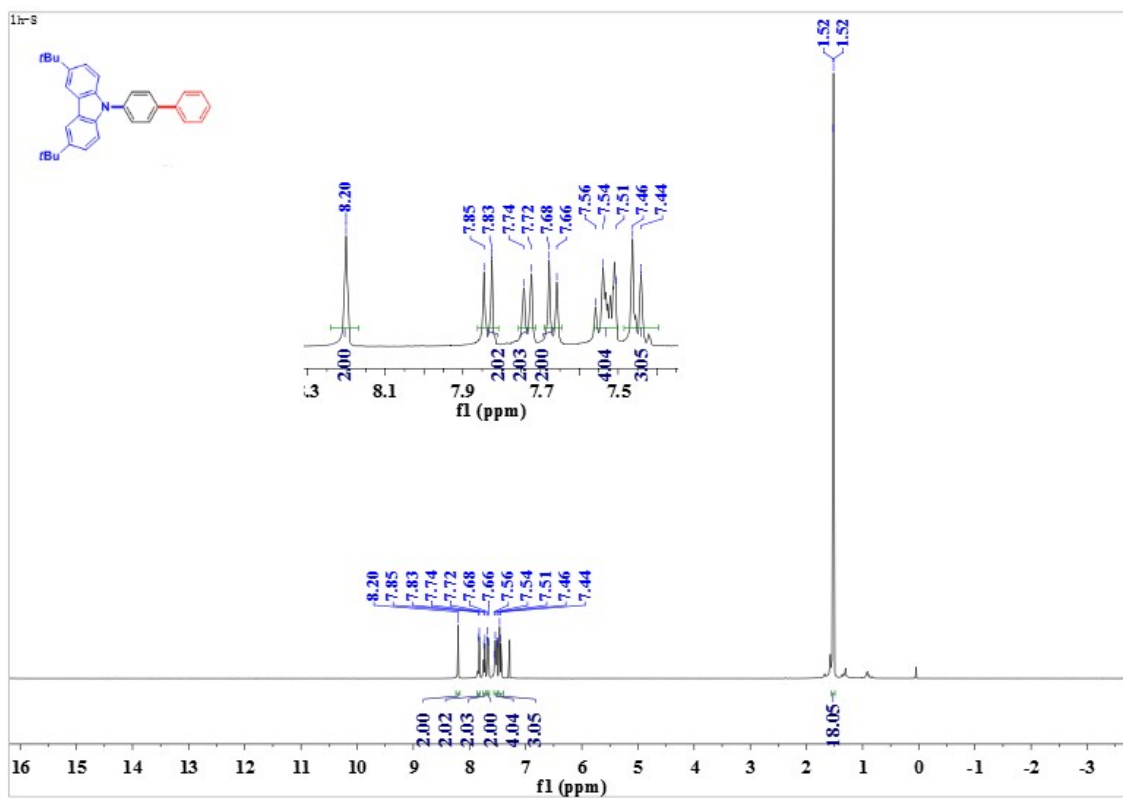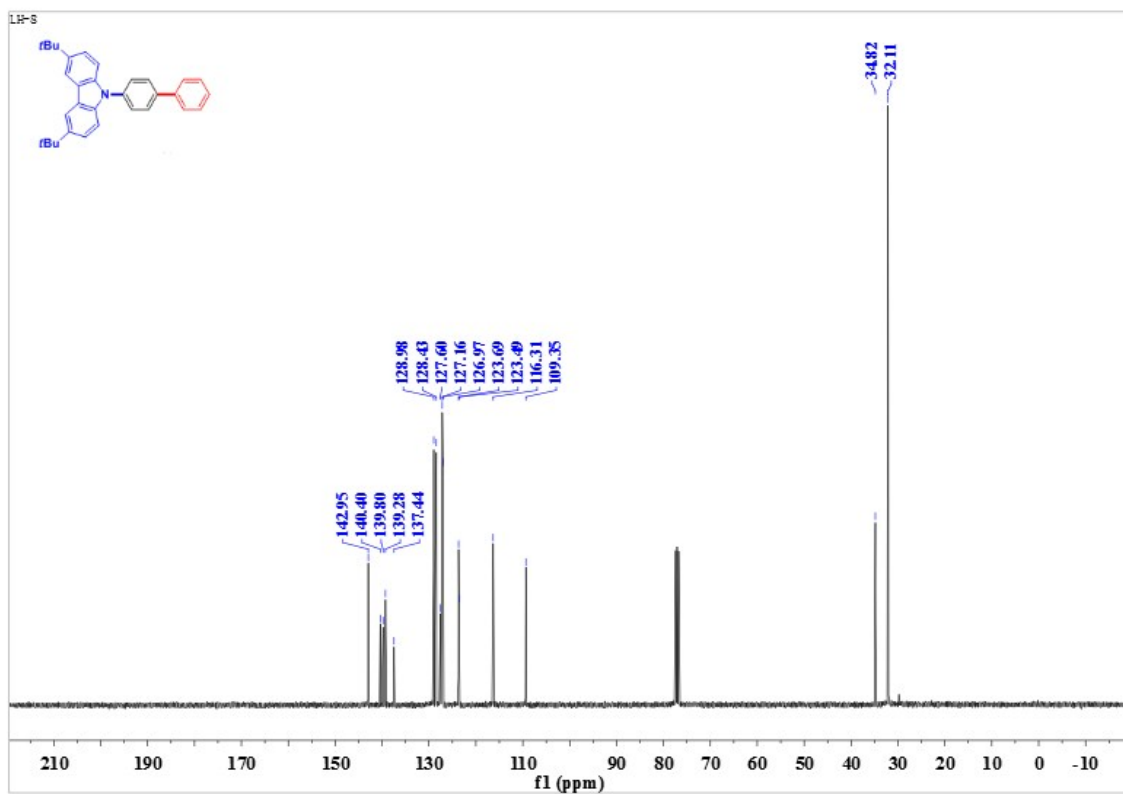



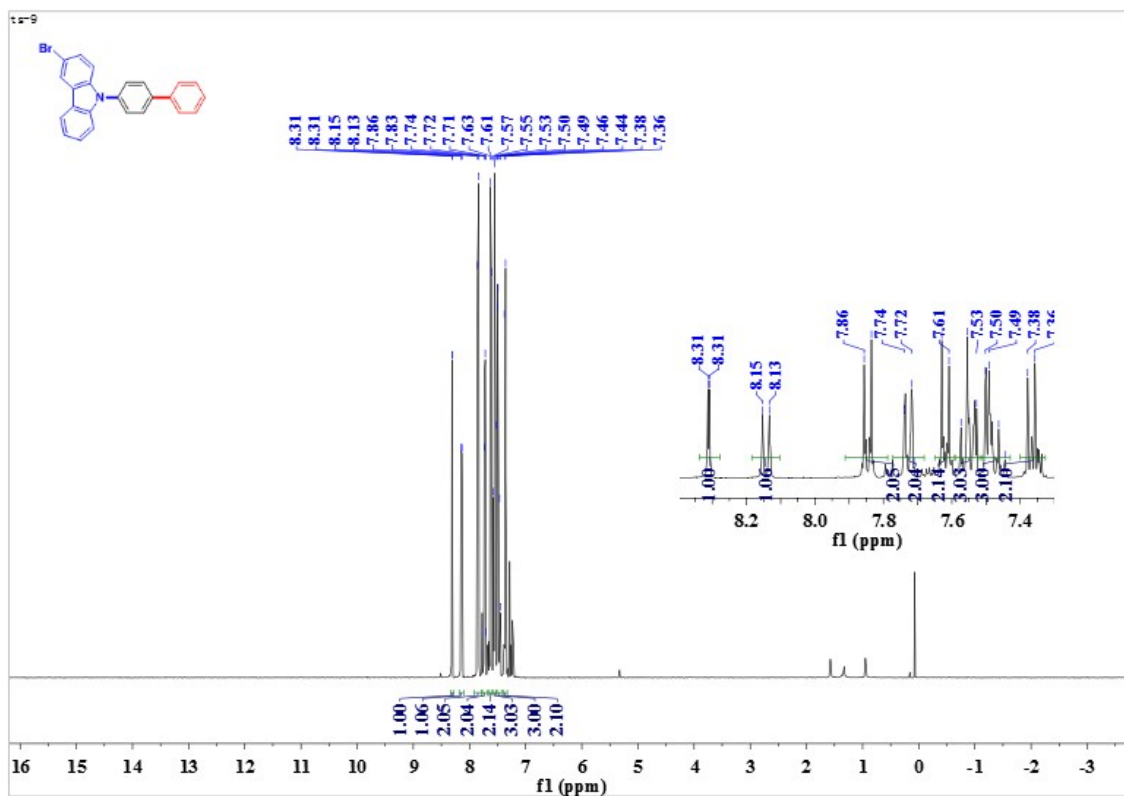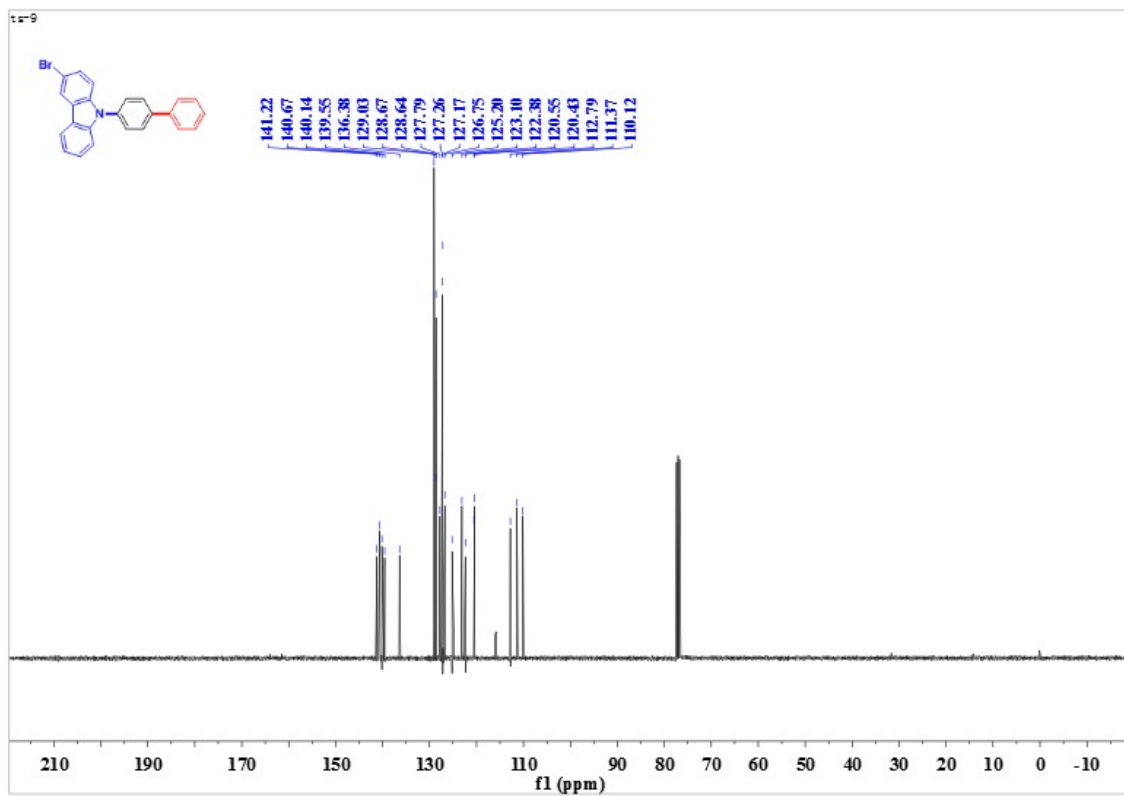

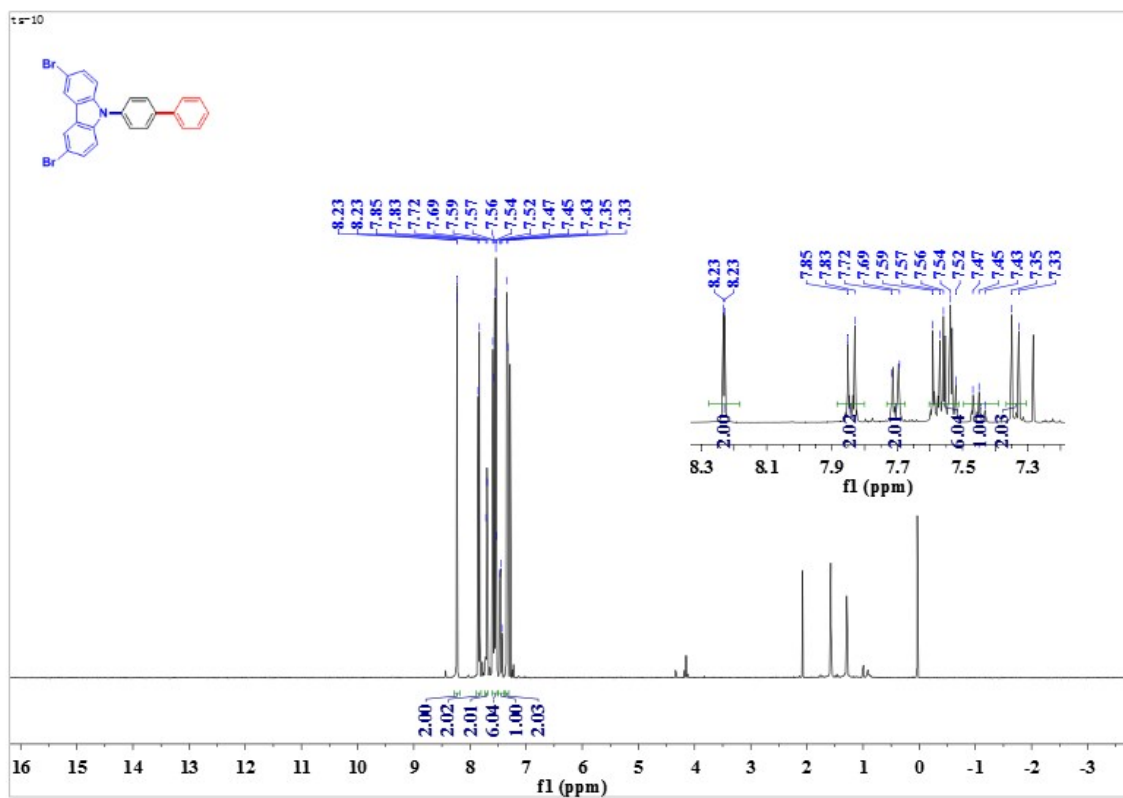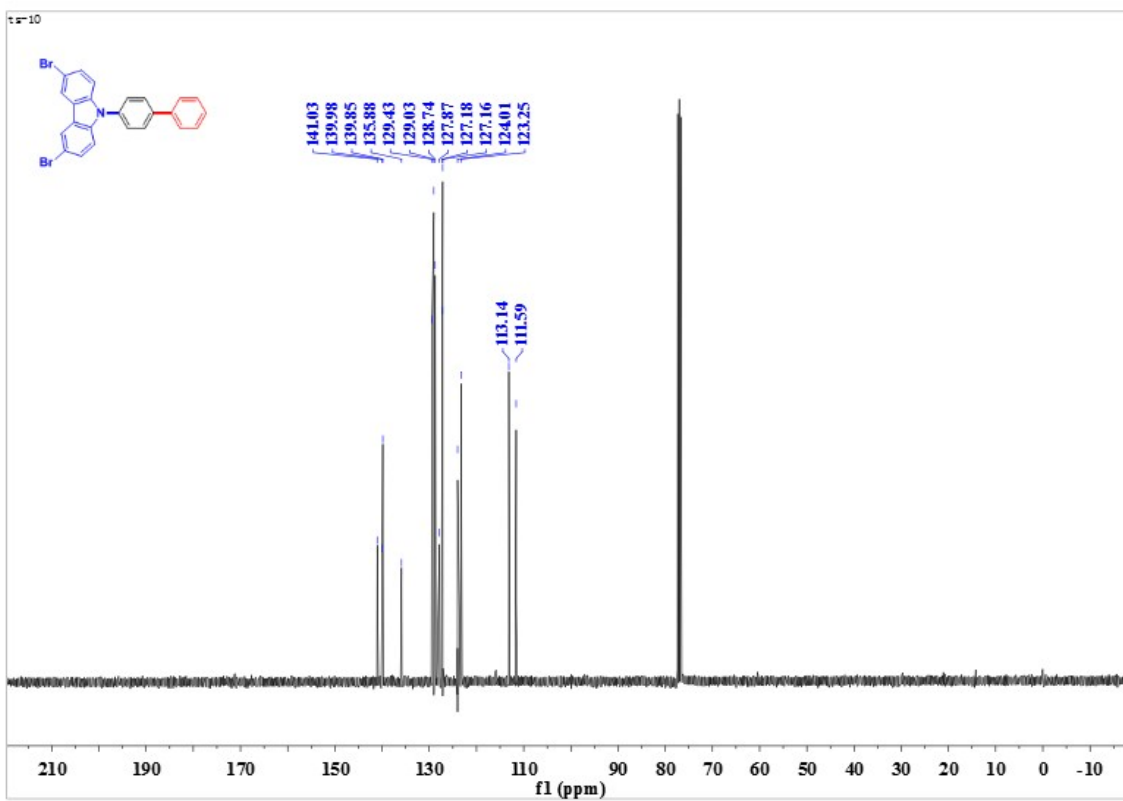

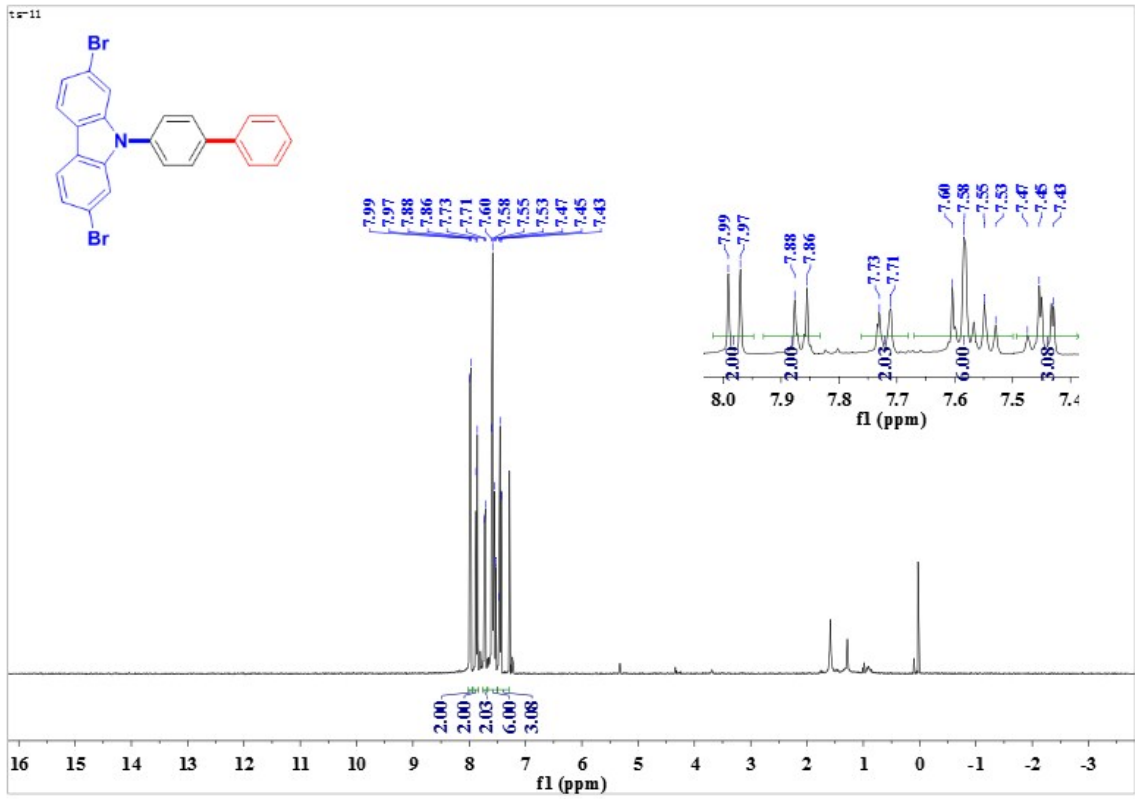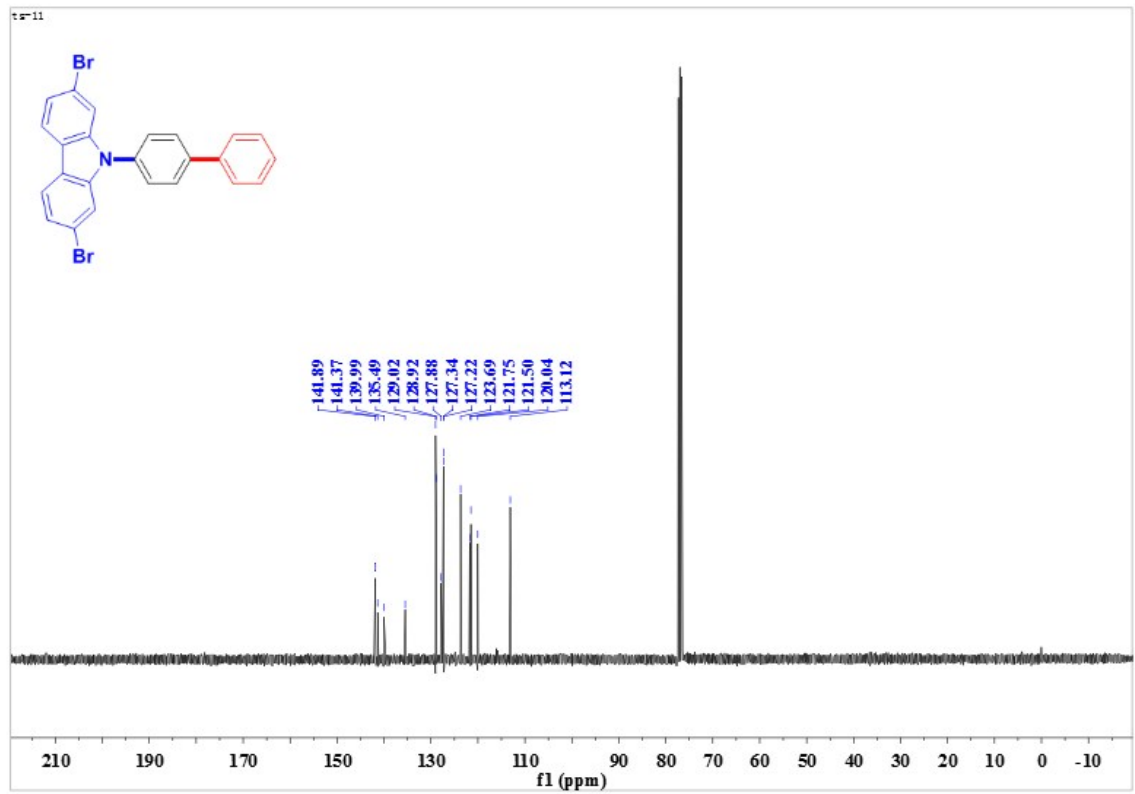

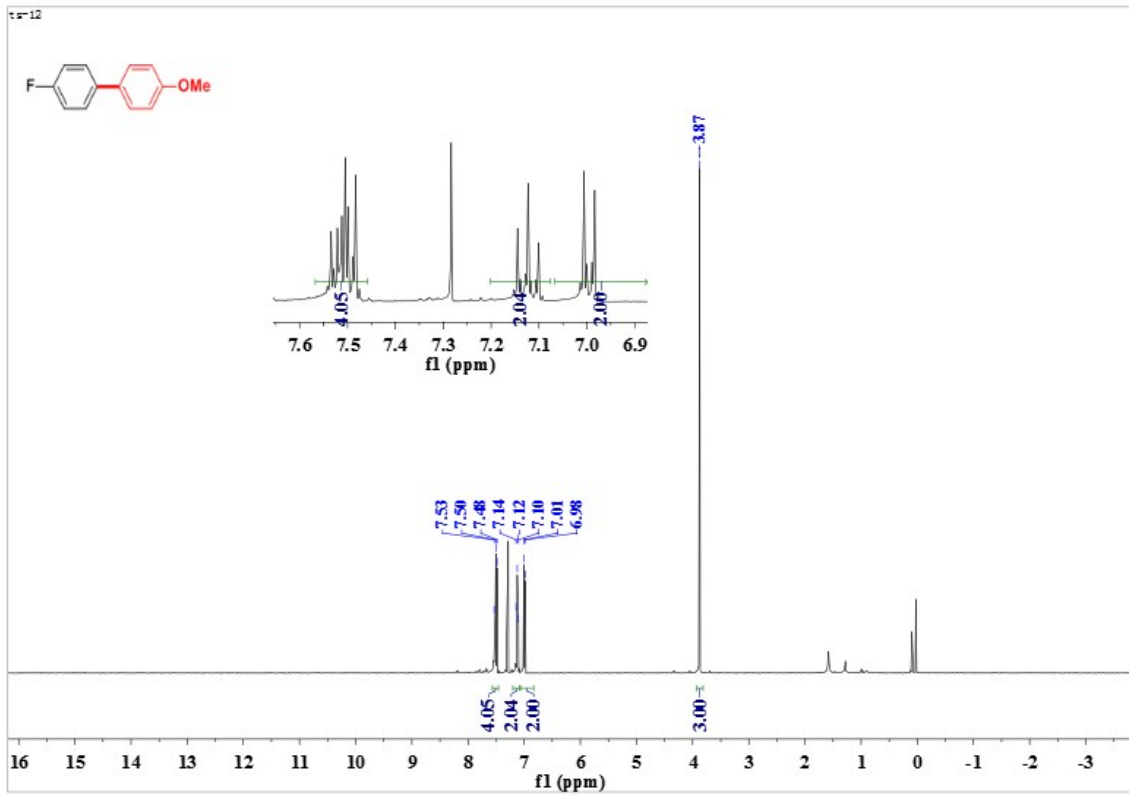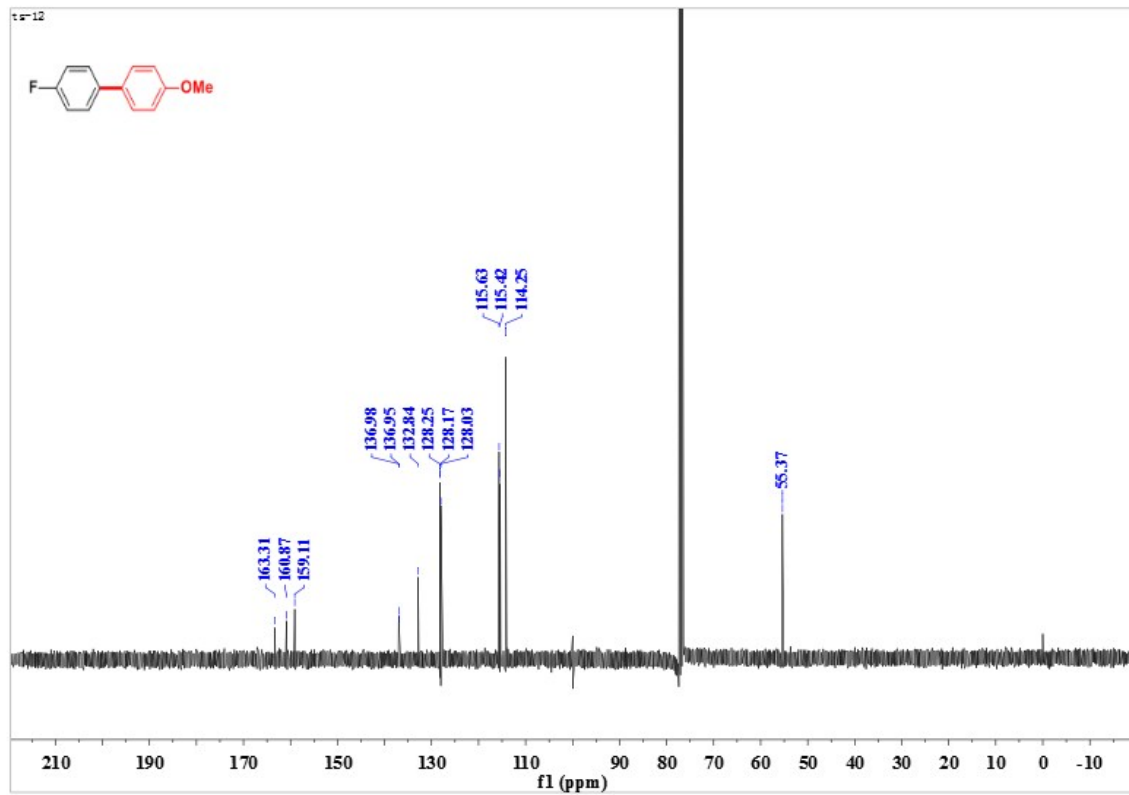

HI-4N-CDC13-20140629-liuning-LN-170-shiheridaxue  
 xinjiang daxue varian inova-600 1H-4N  
 liuning-LN-170-shiheridaxue in CDC13

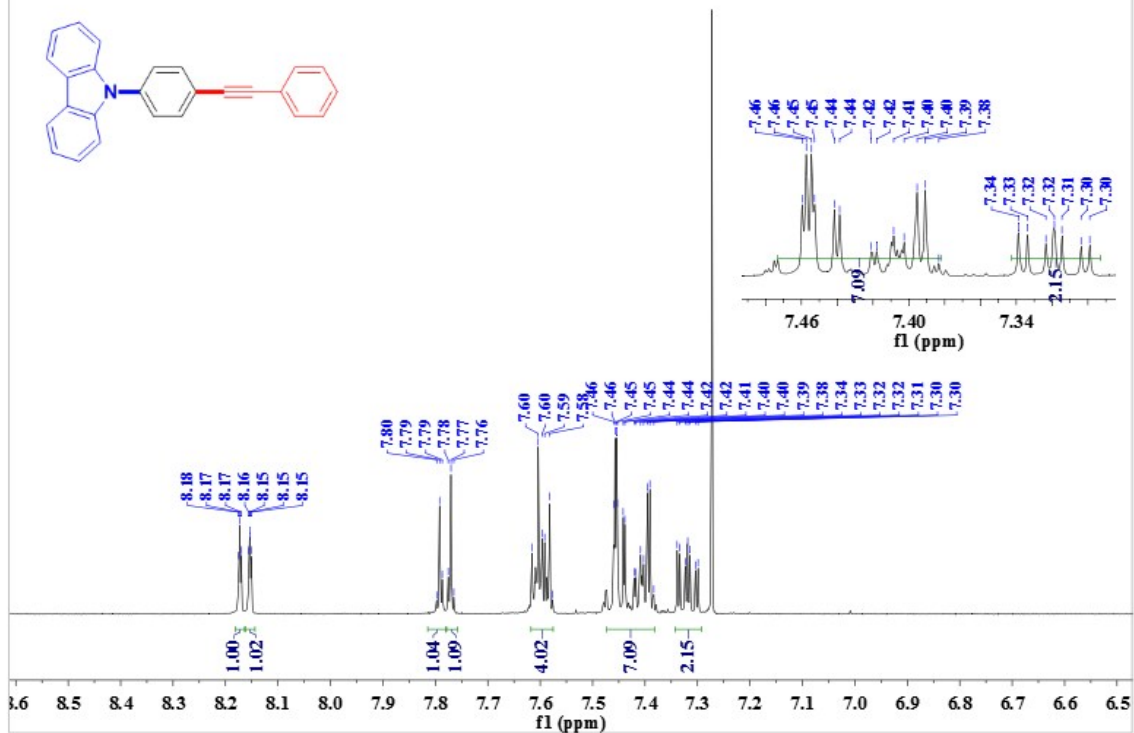

C13-4N-CDC13-20140706-liuning-LN-170-shiheridaxue  
 xinjiang daxue varian inova-400 13C-4N  
 liuning-LN-170-shiheridaxue in CDC13

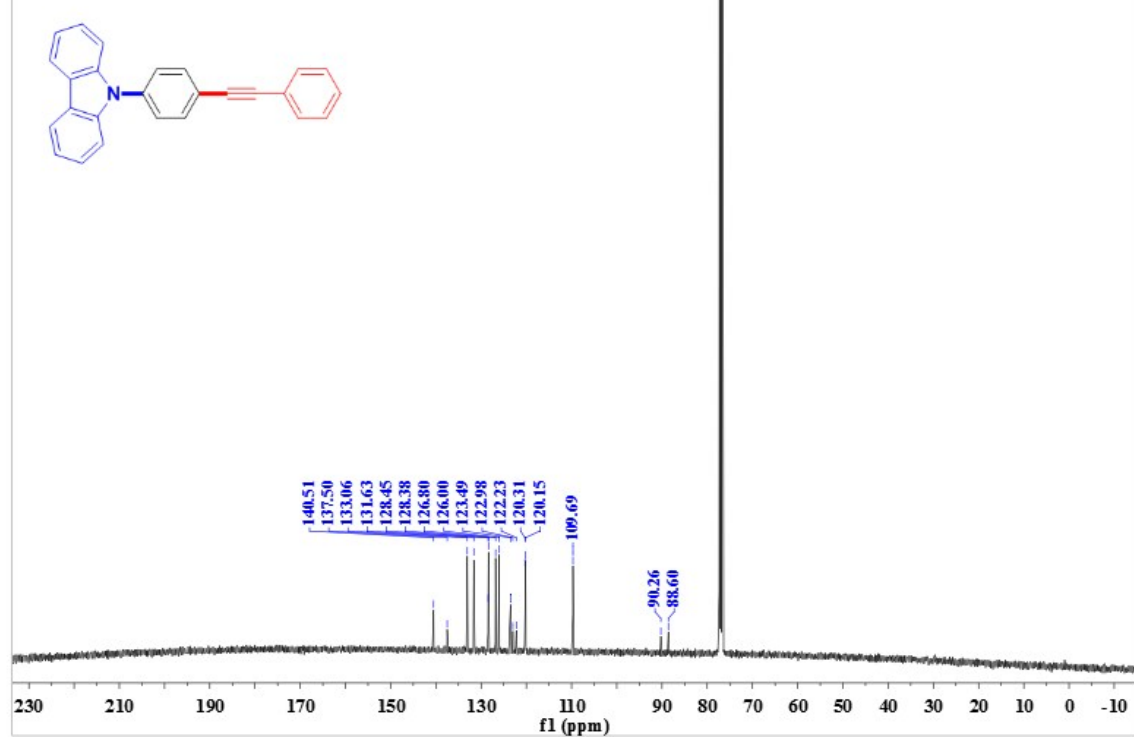

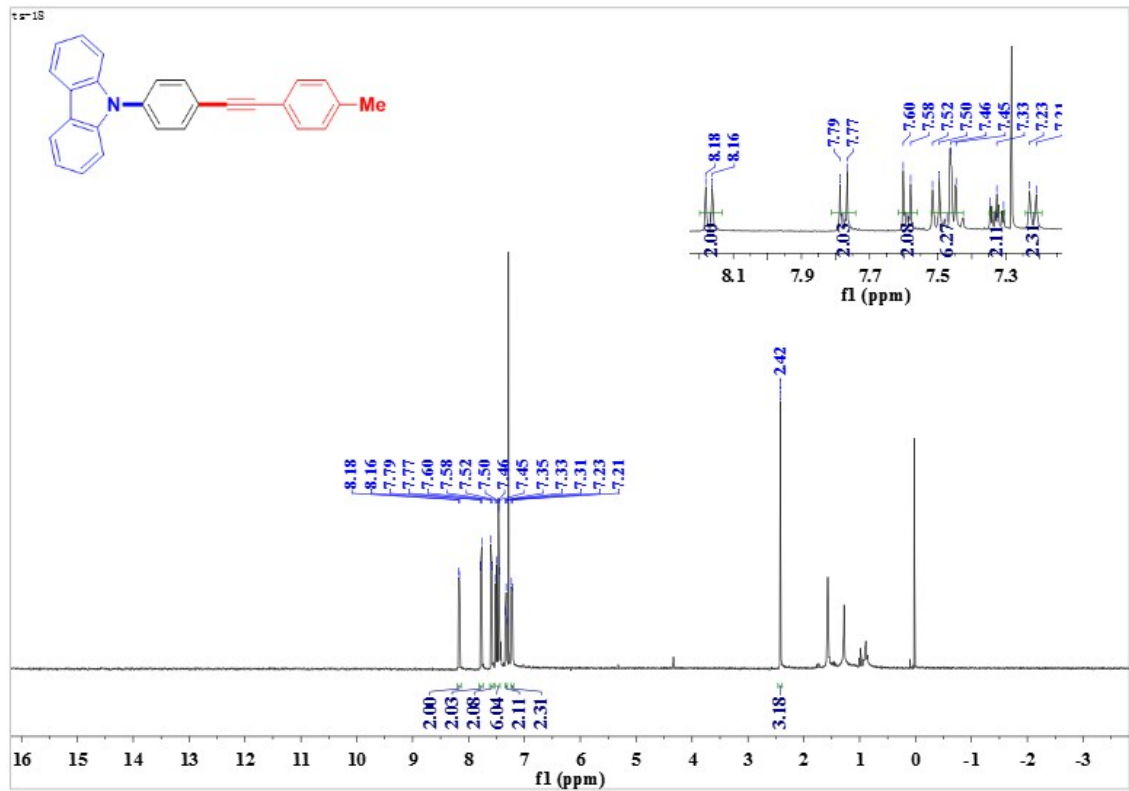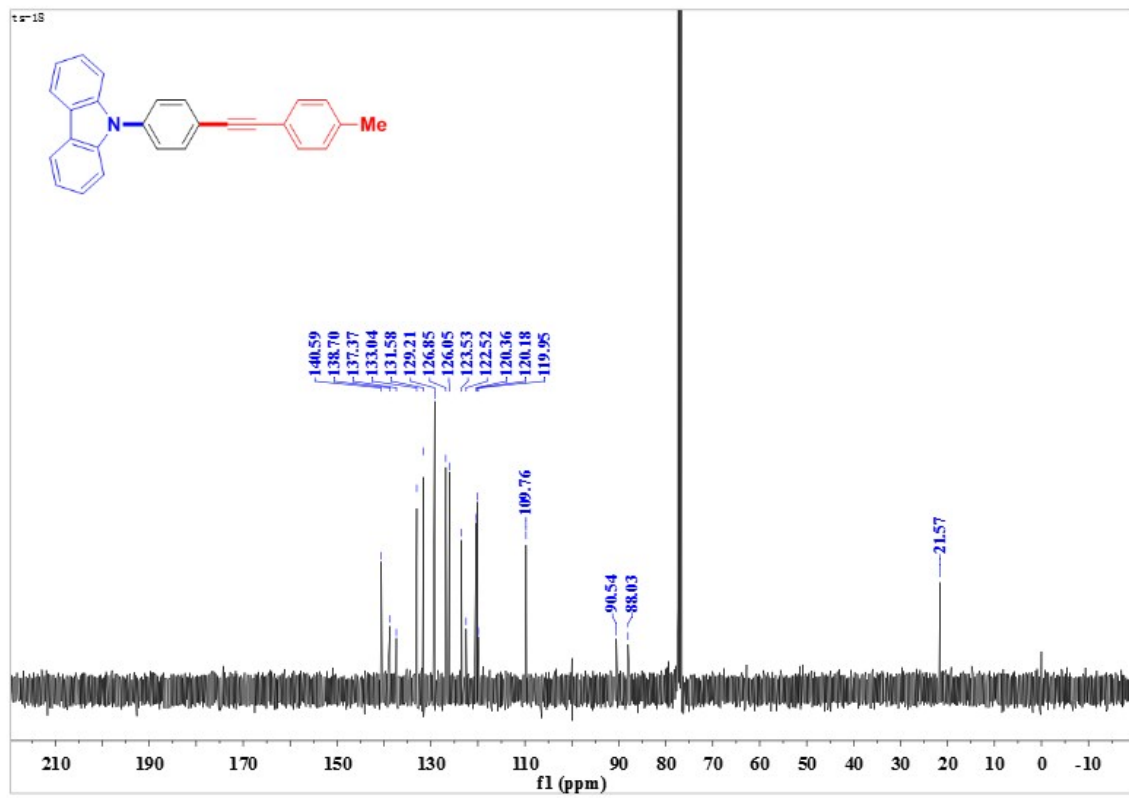

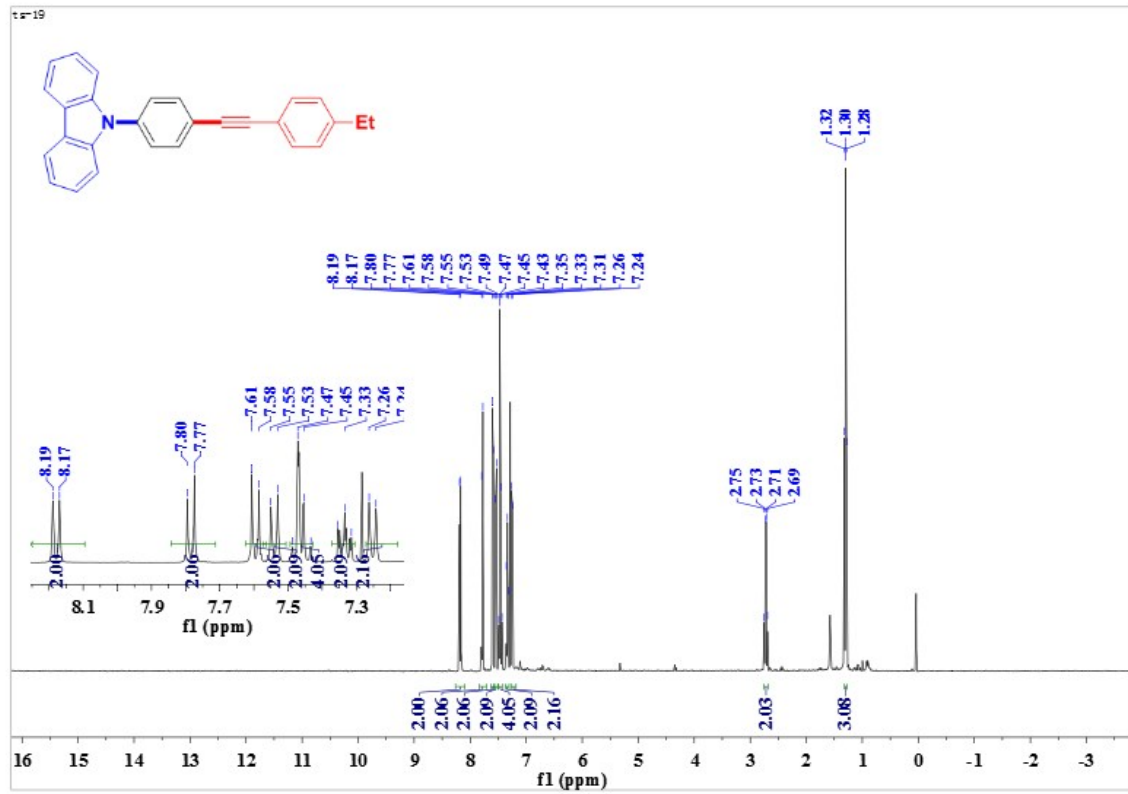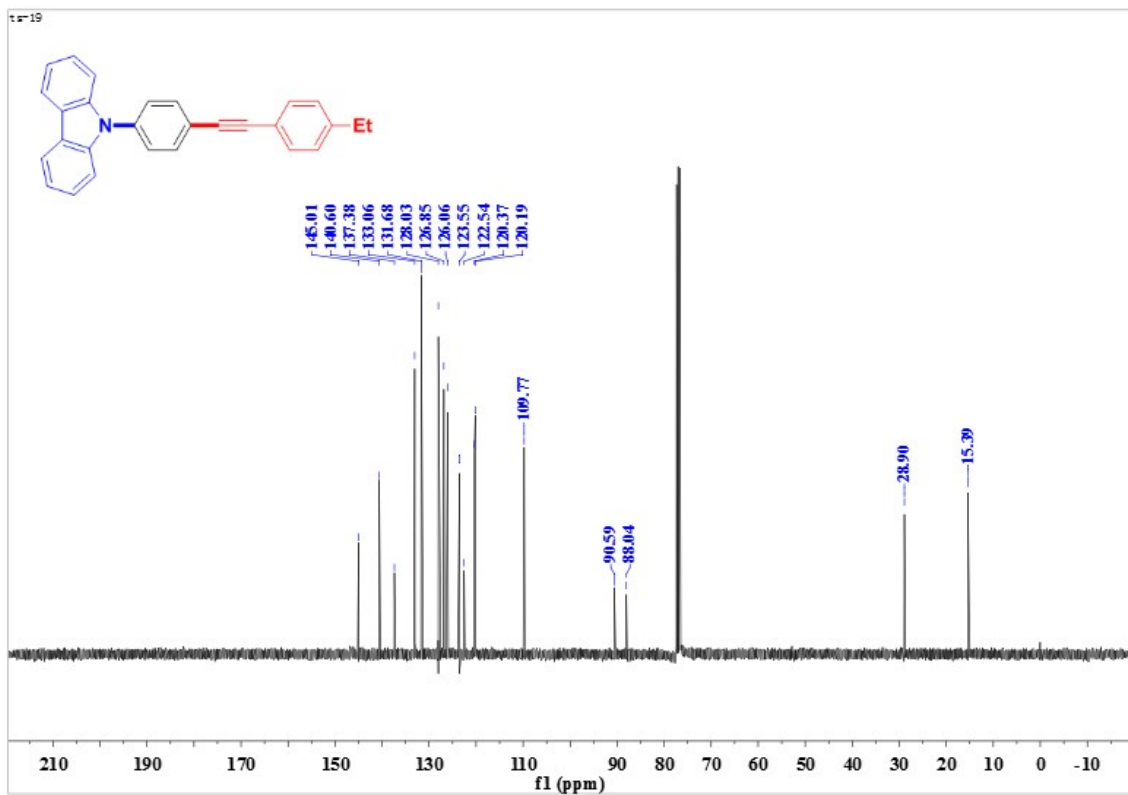

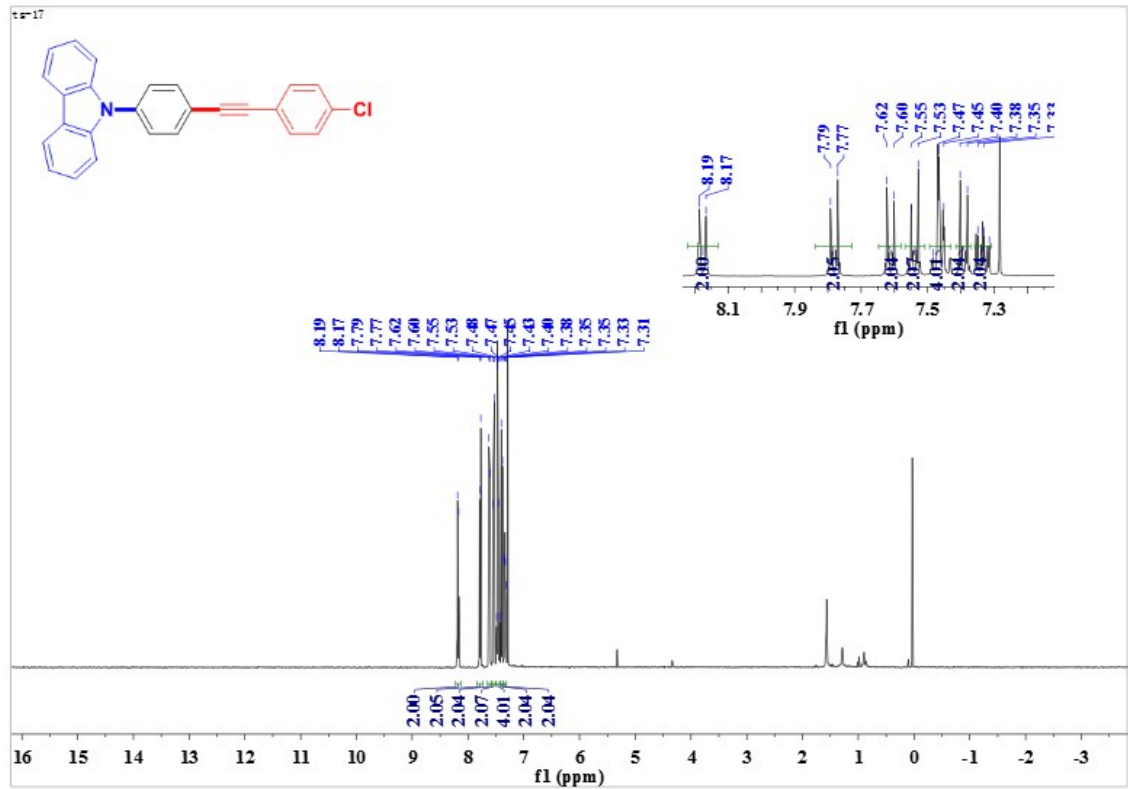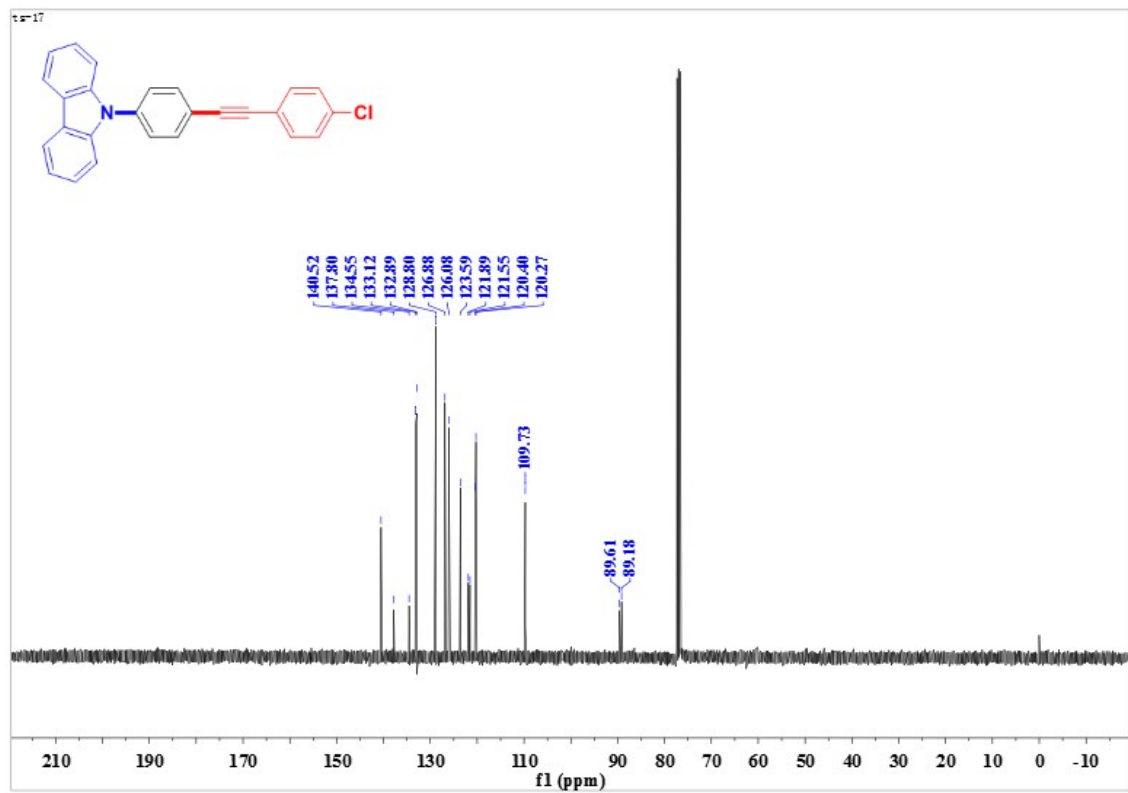



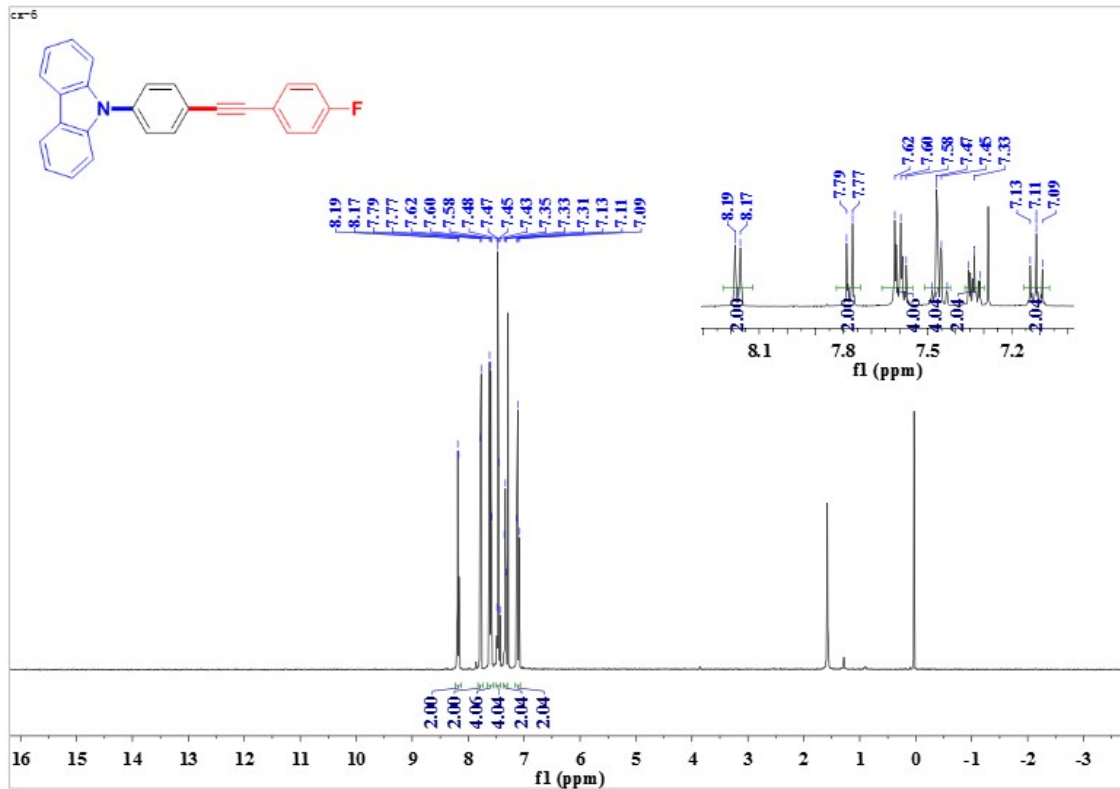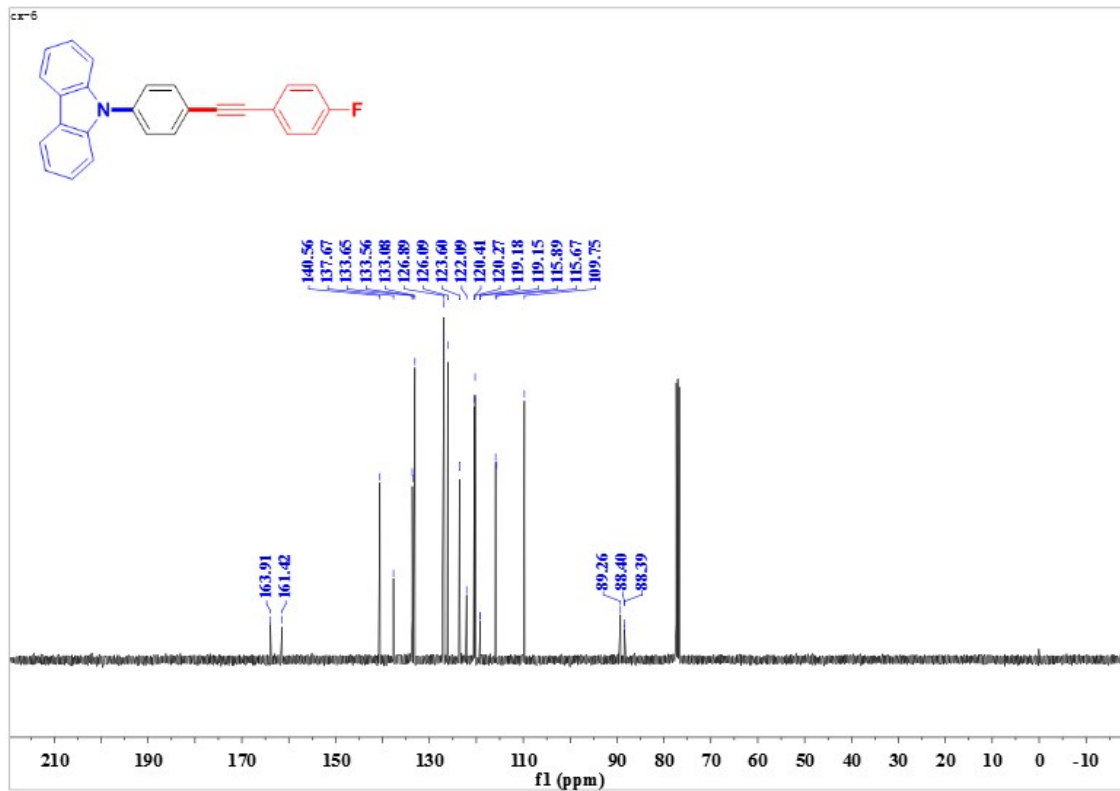

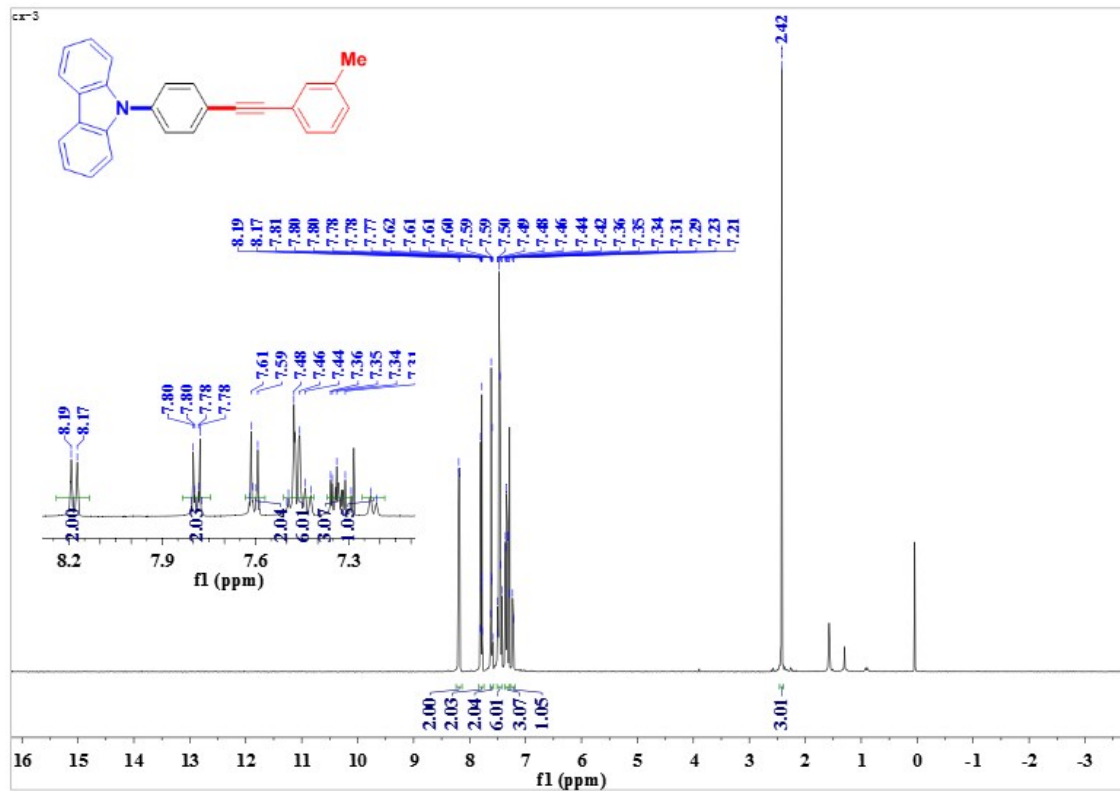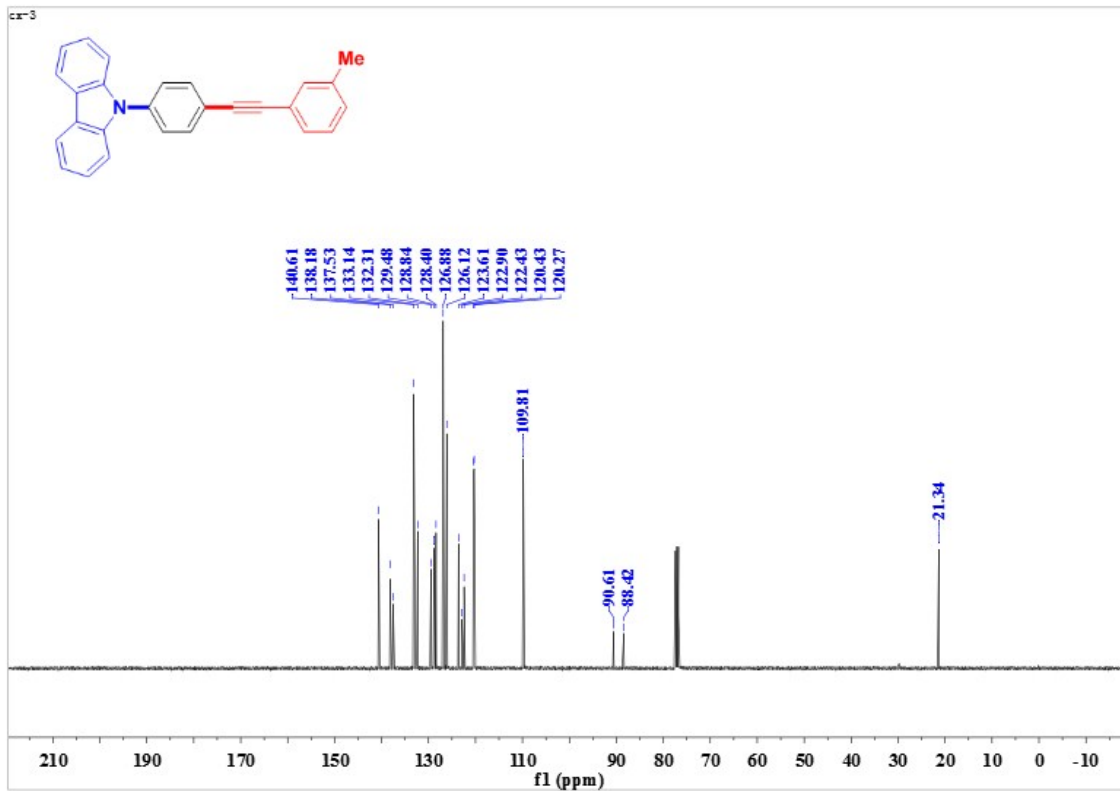

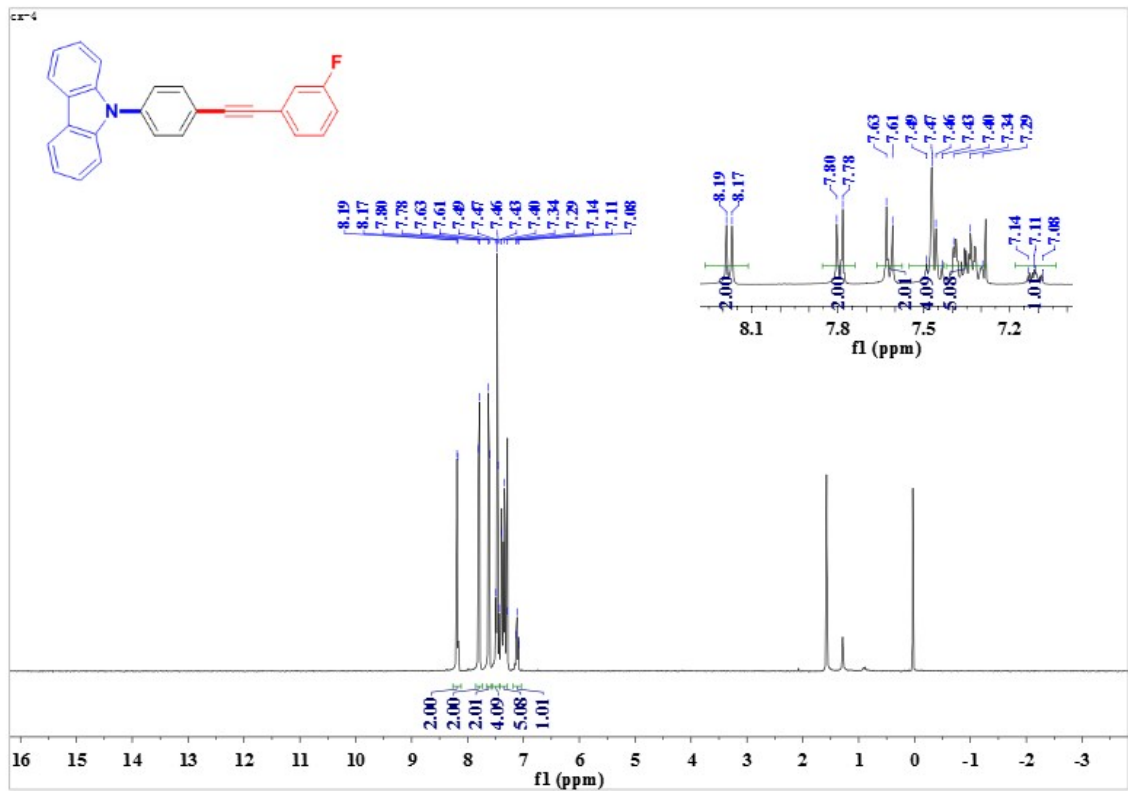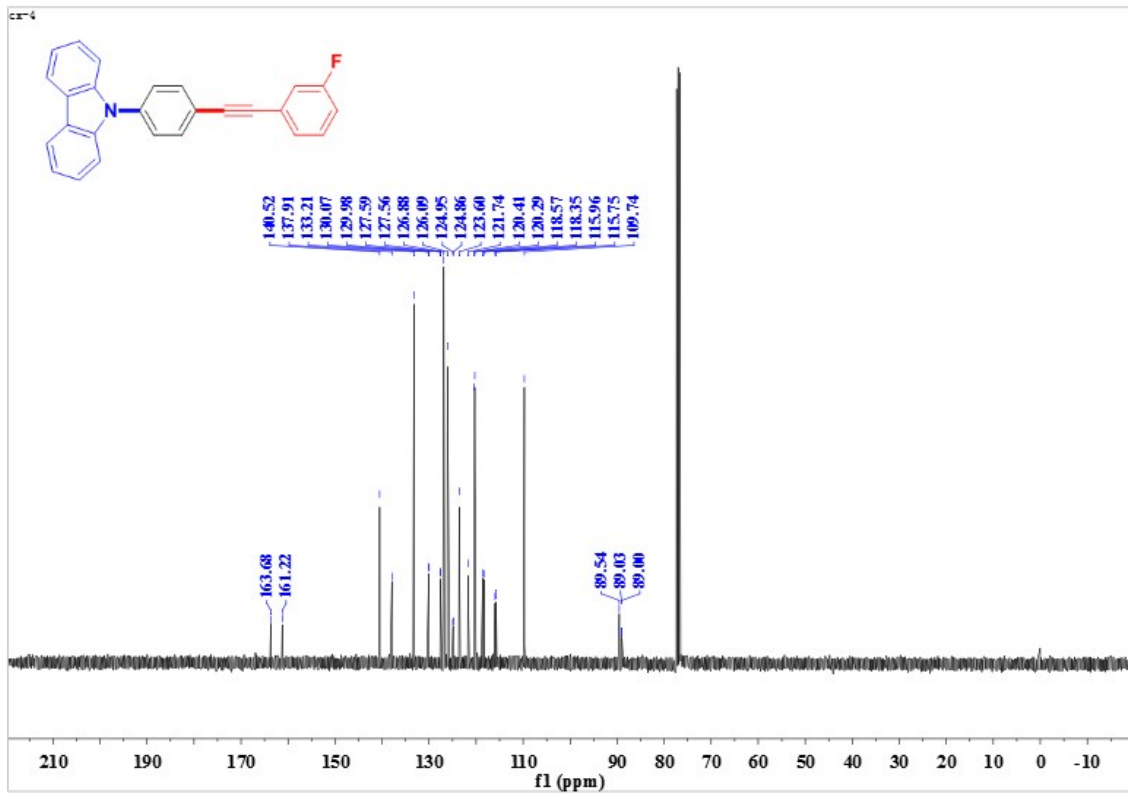

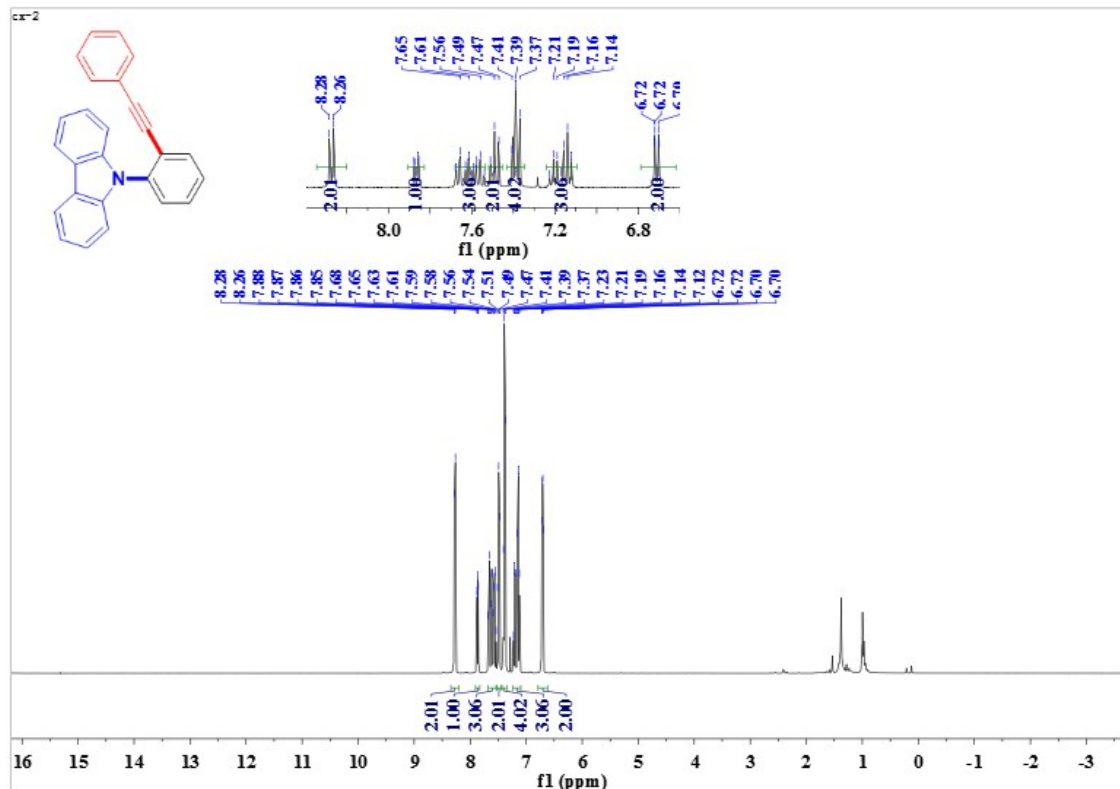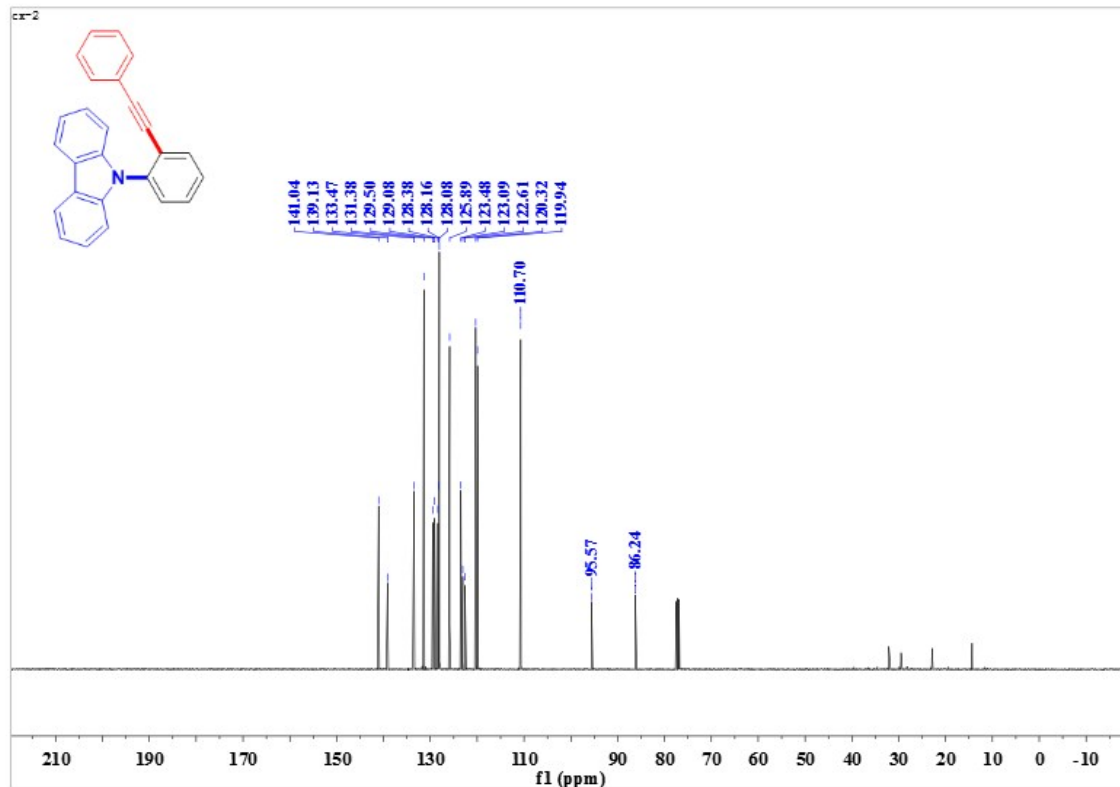

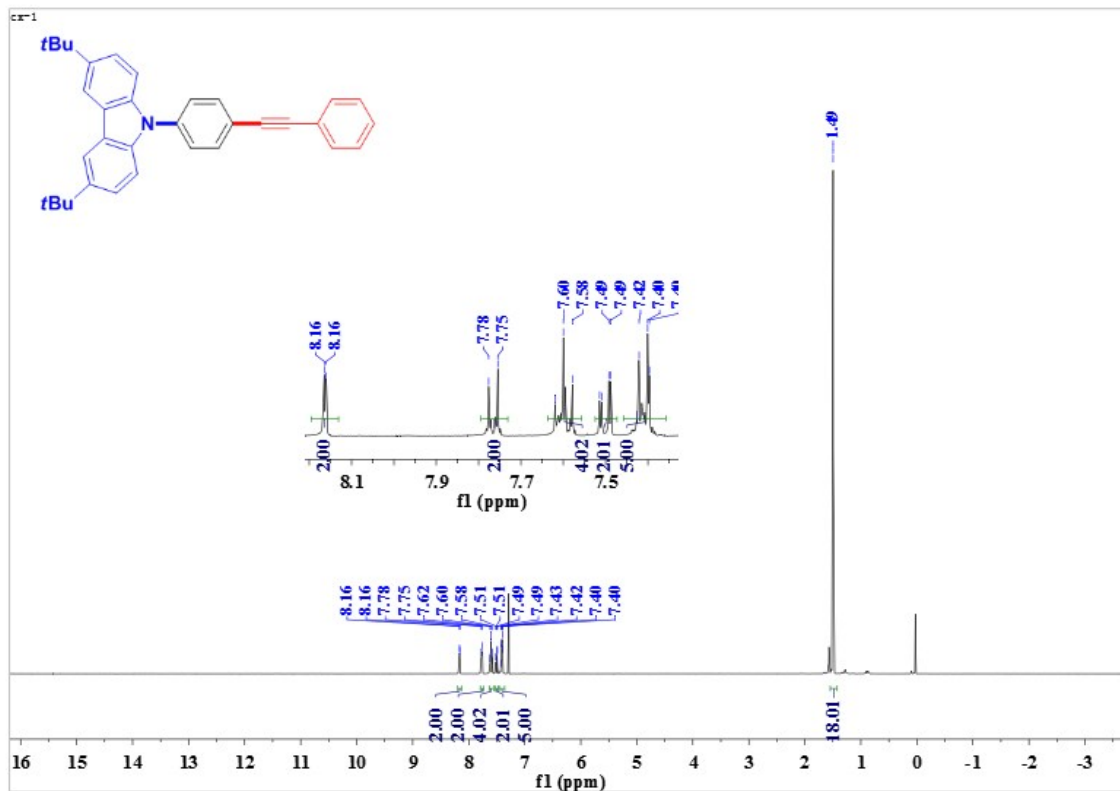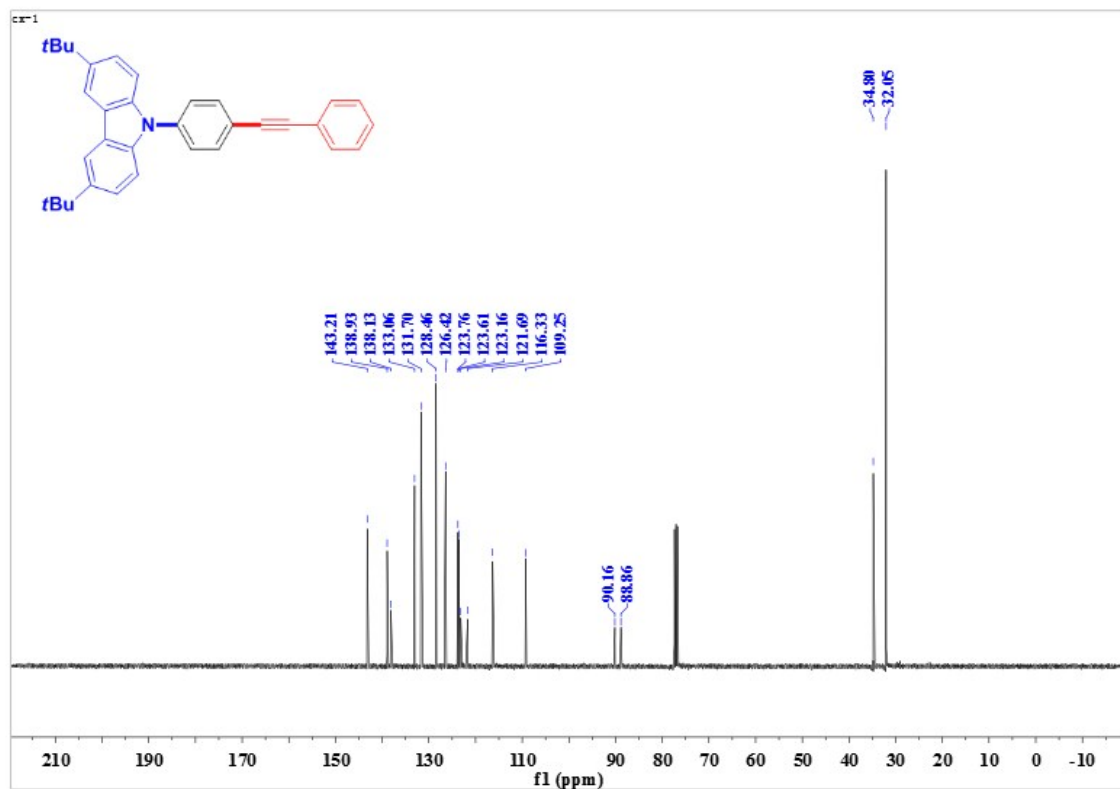

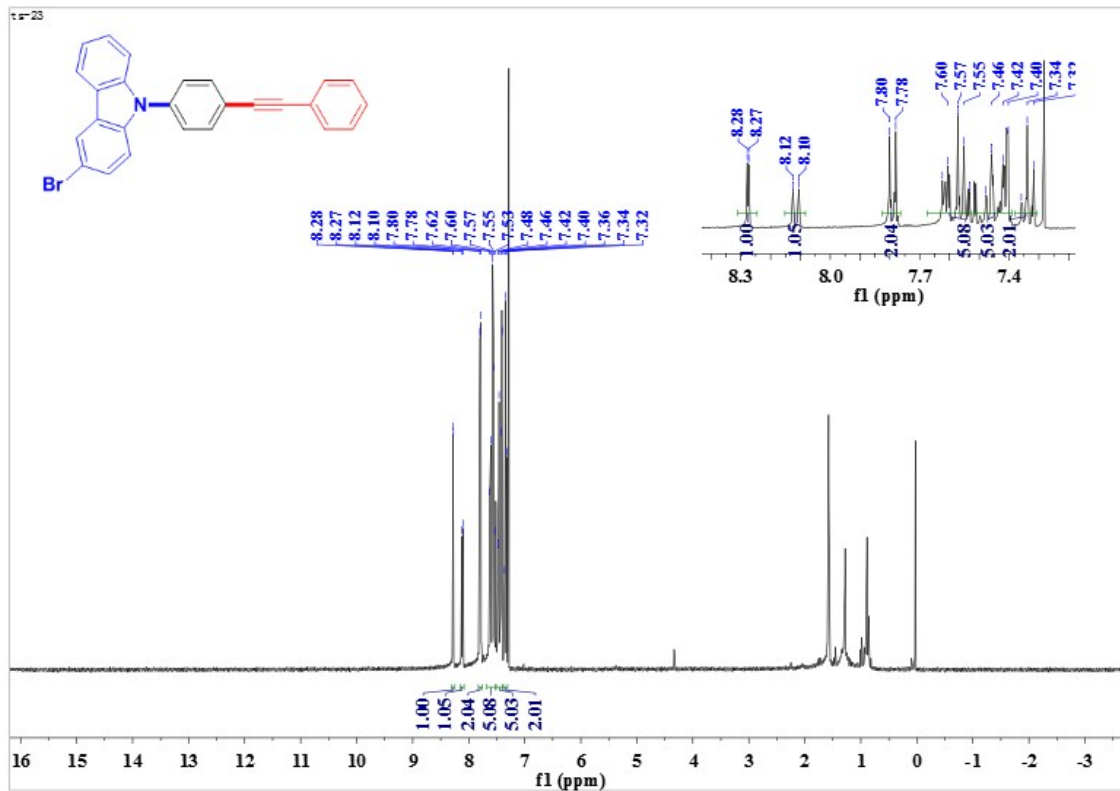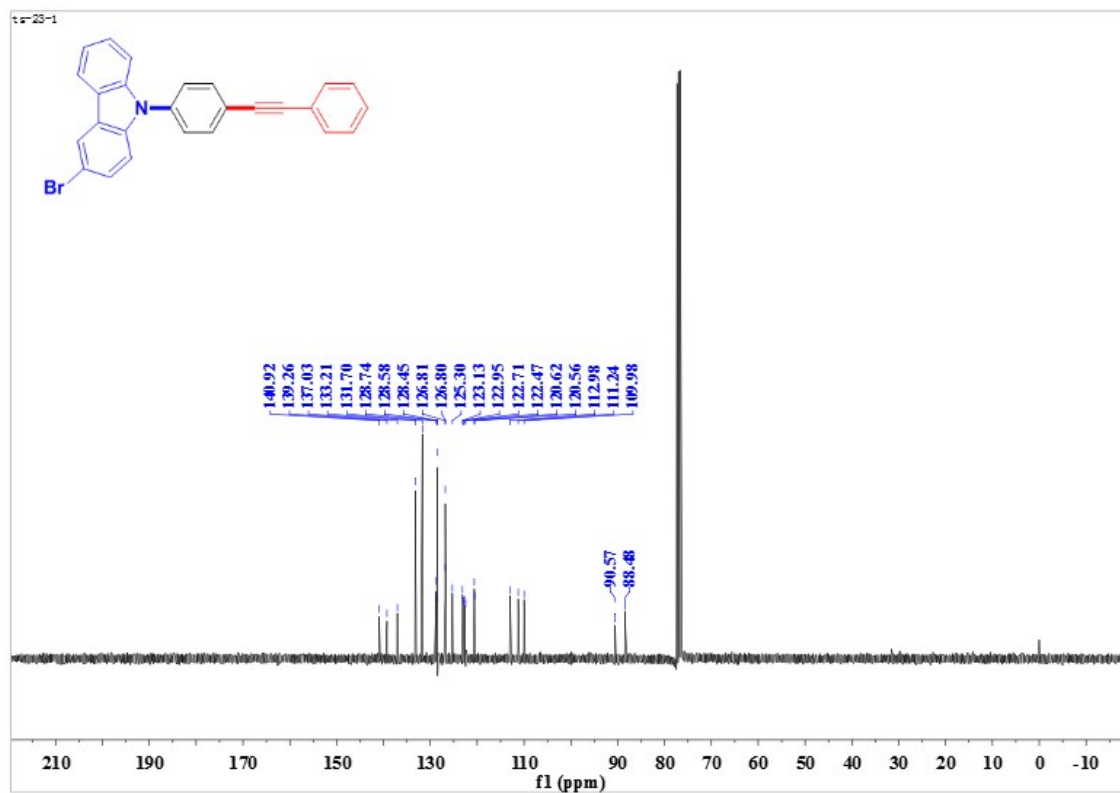

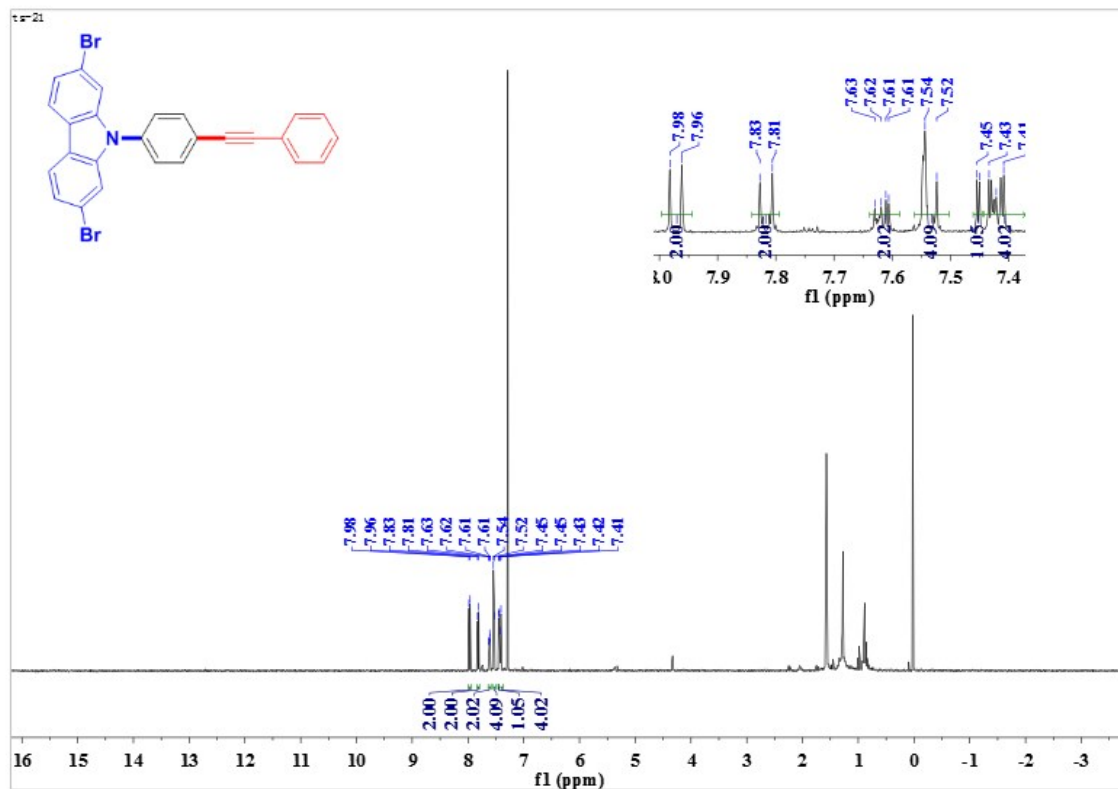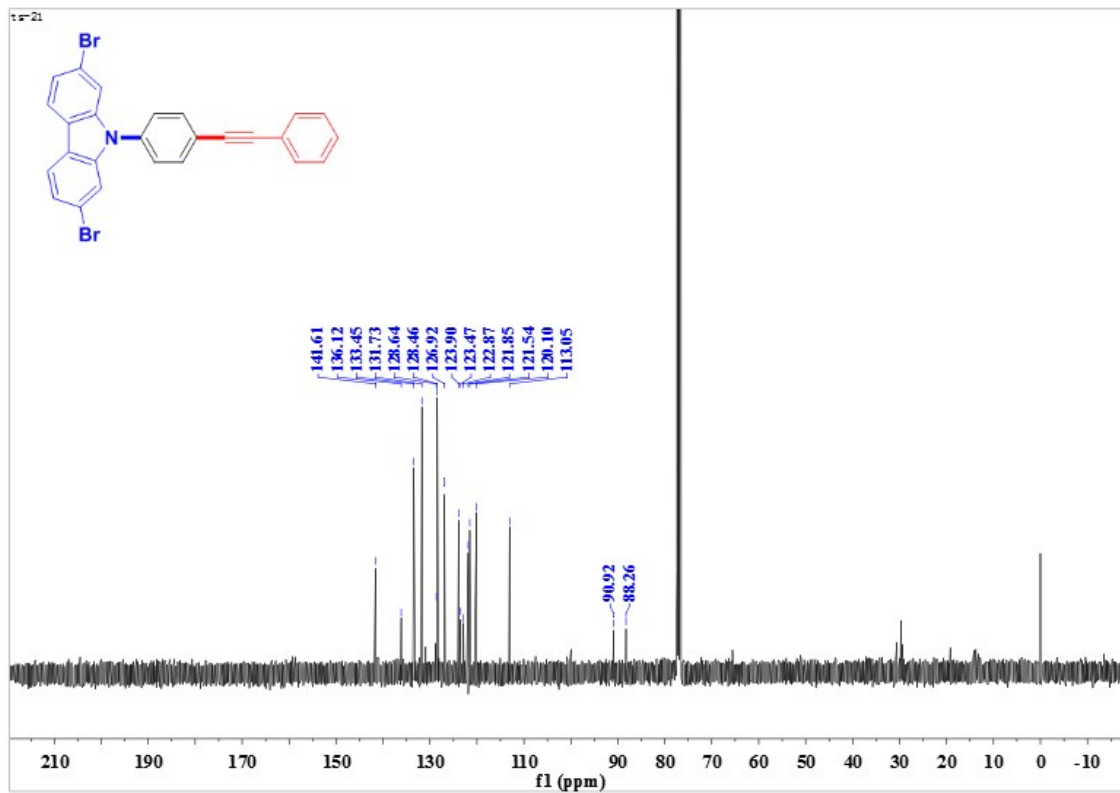

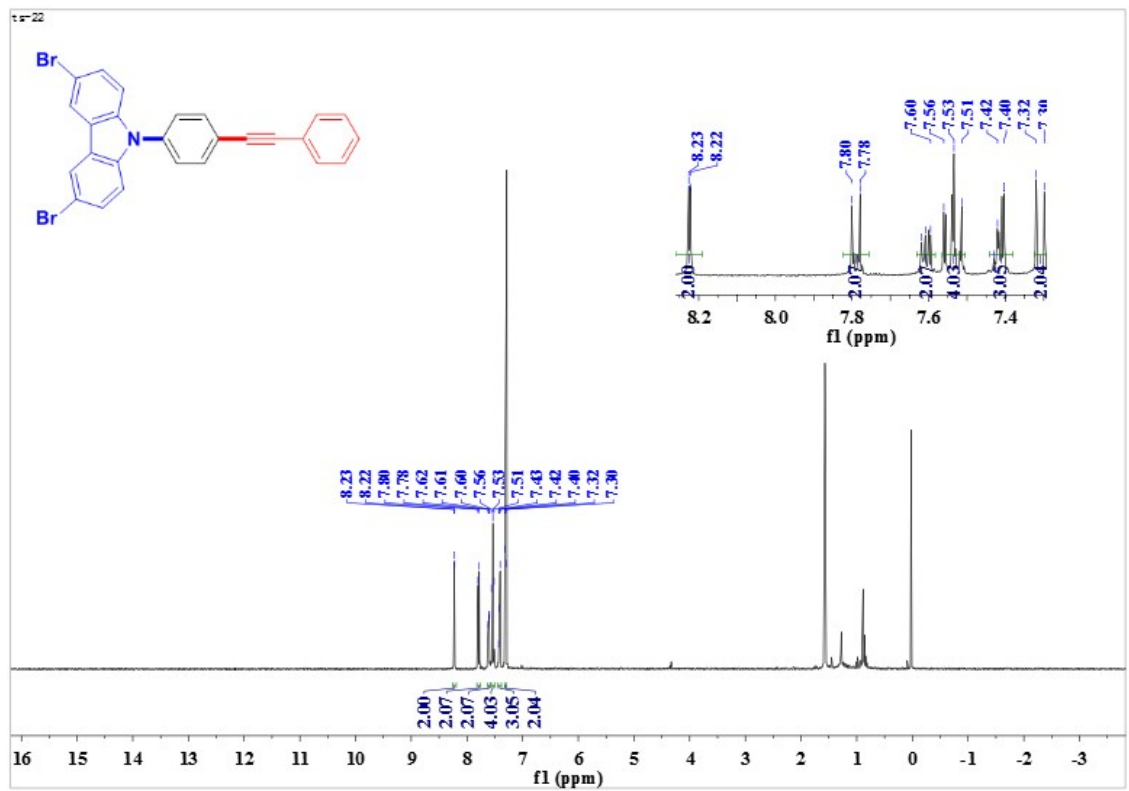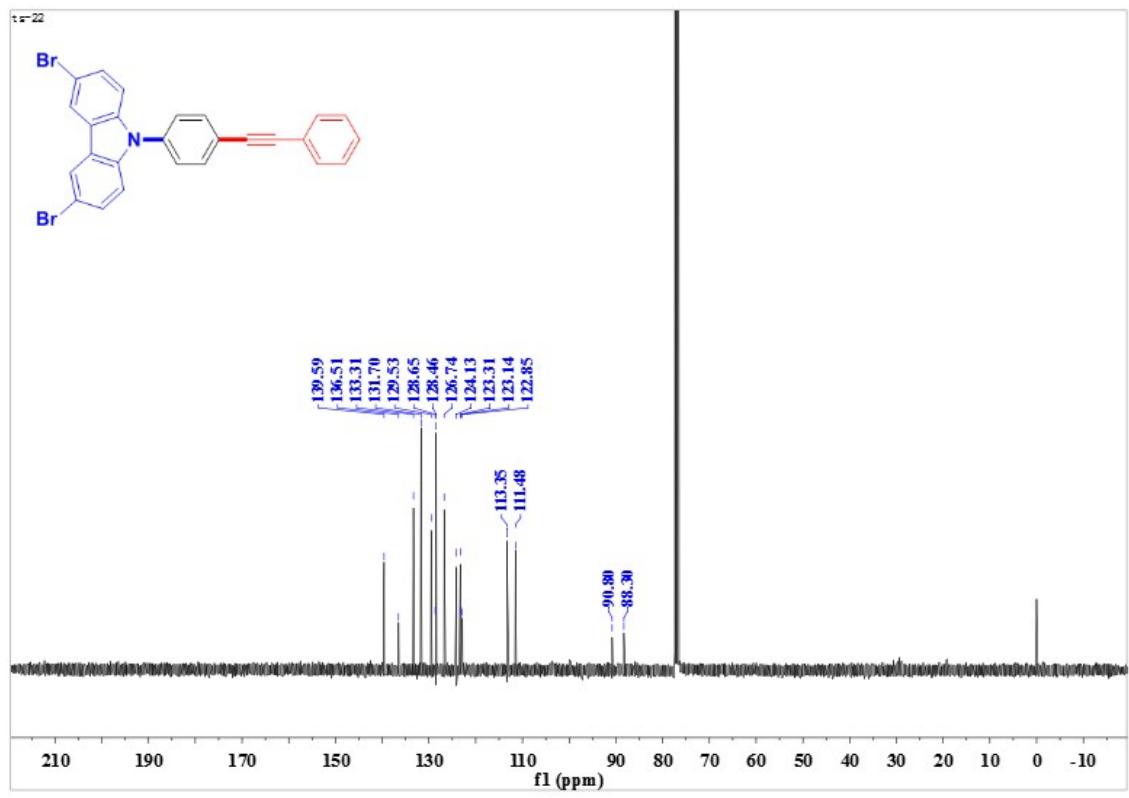



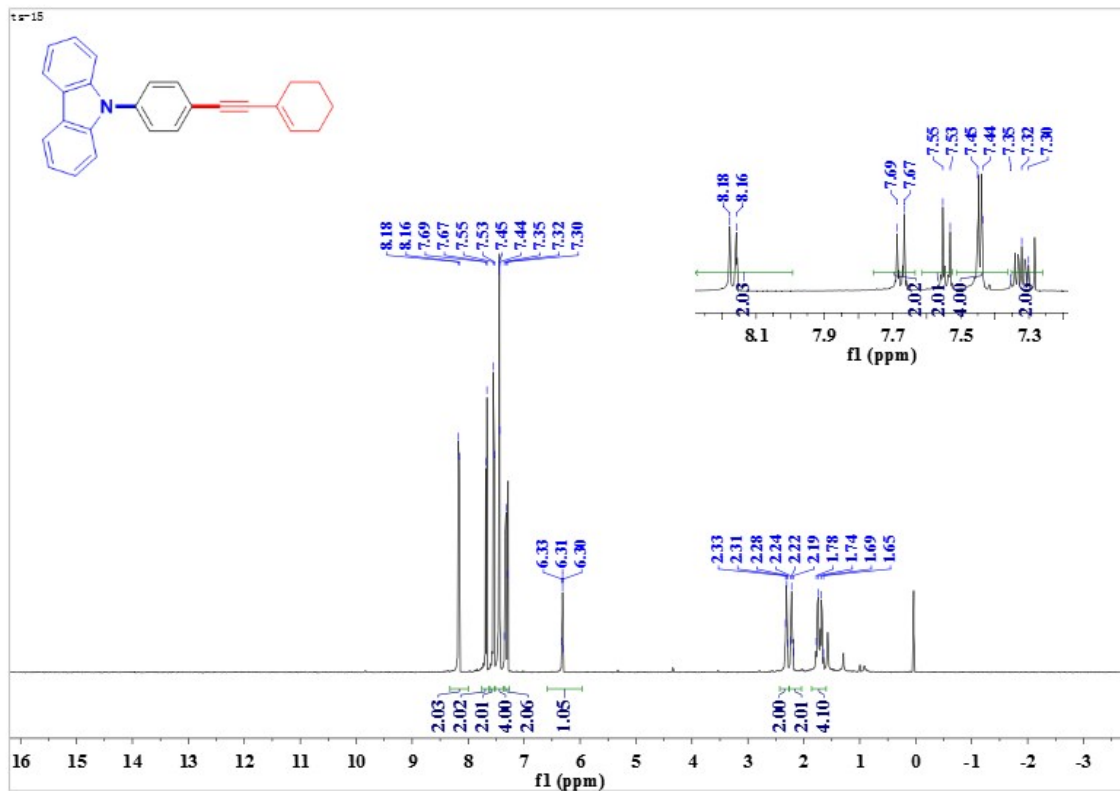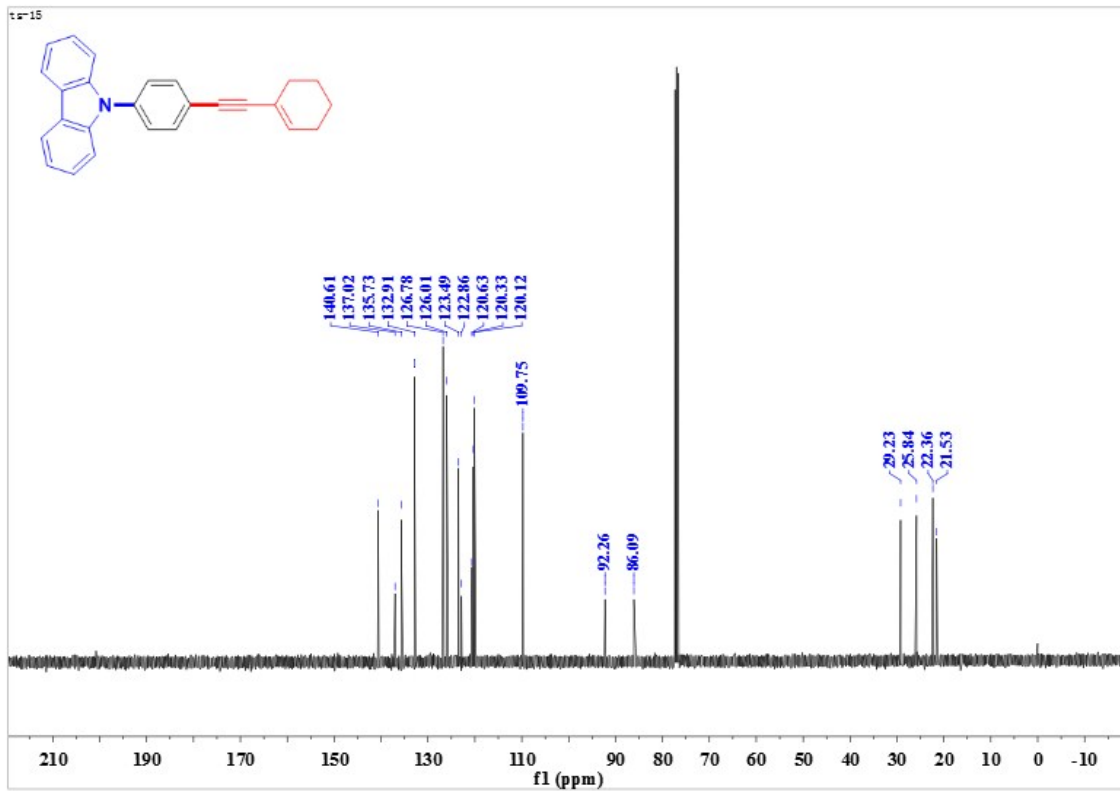

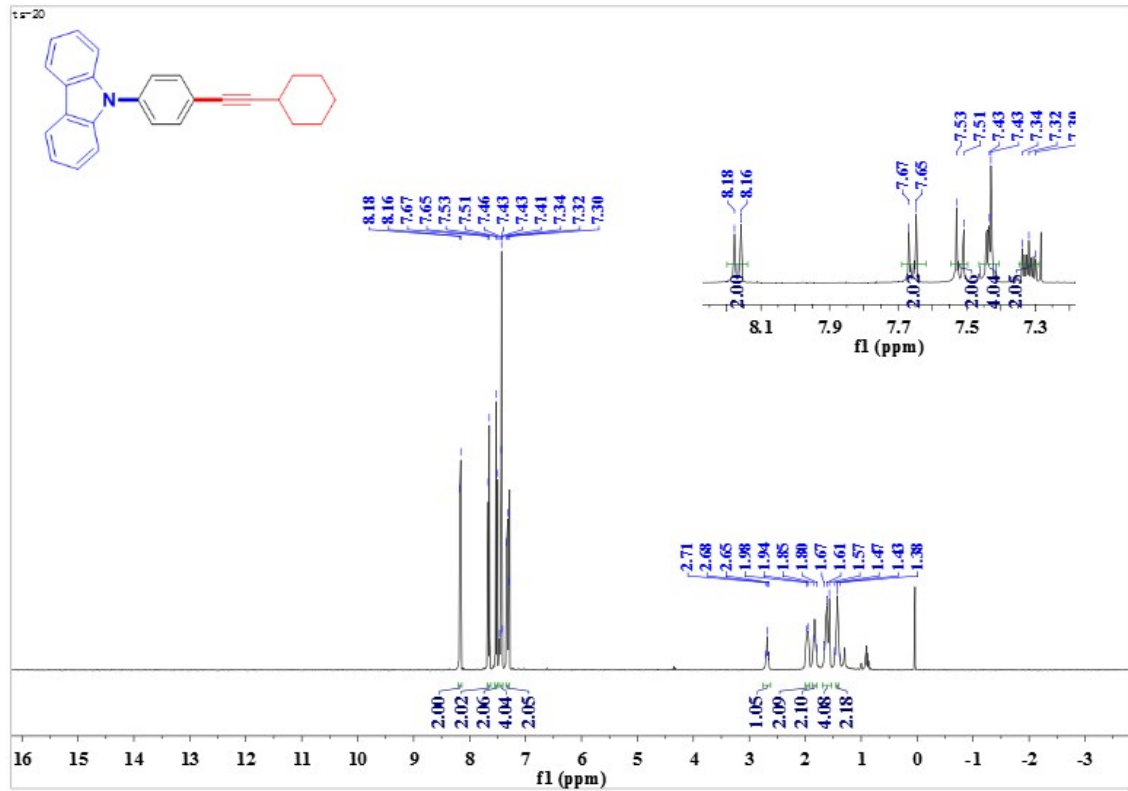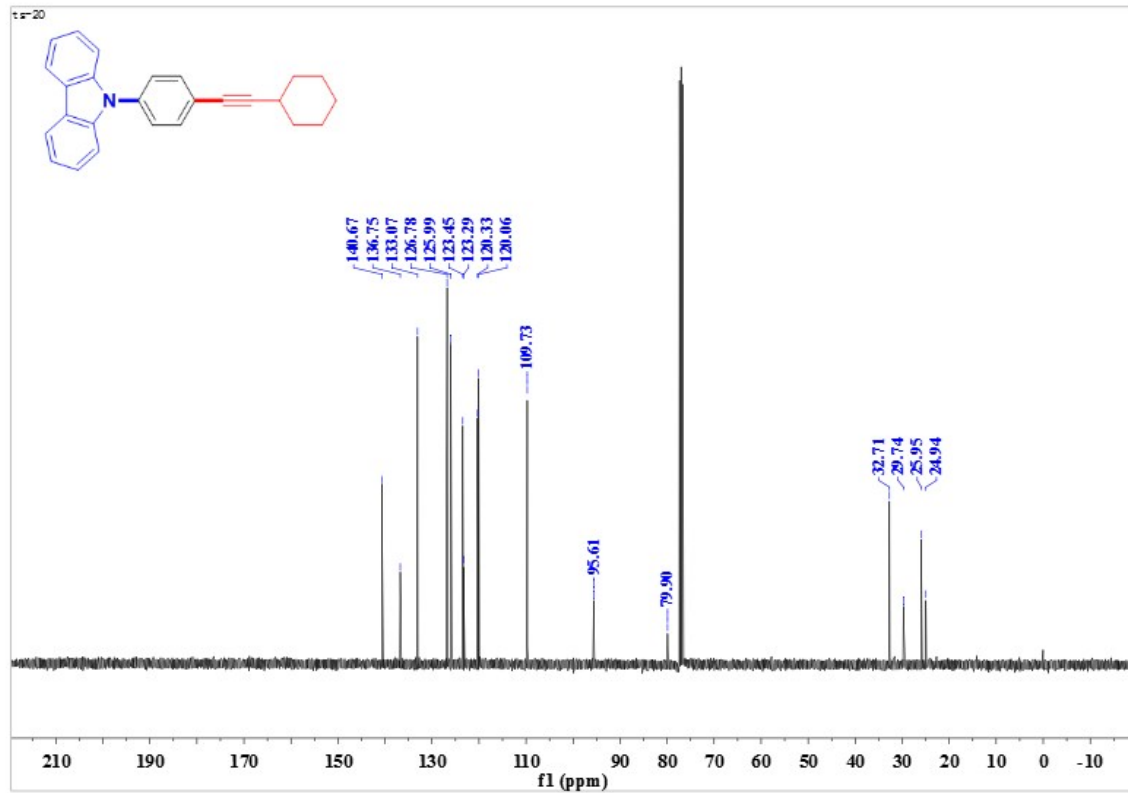

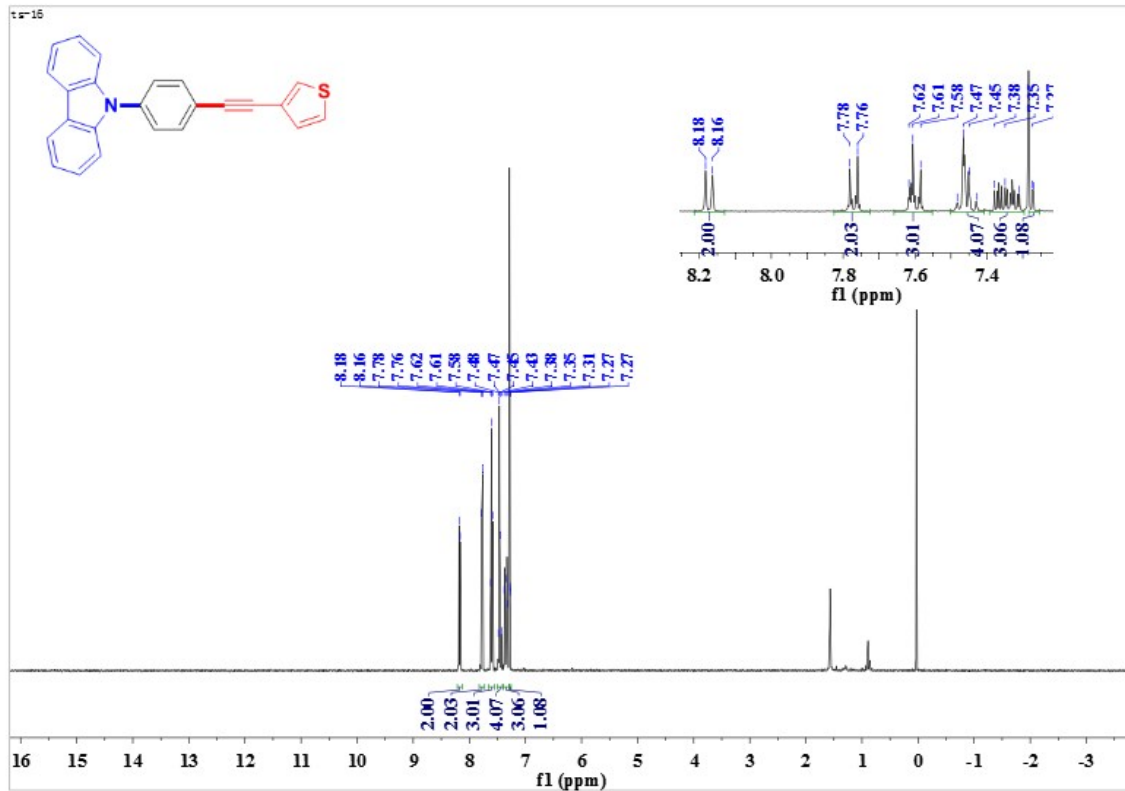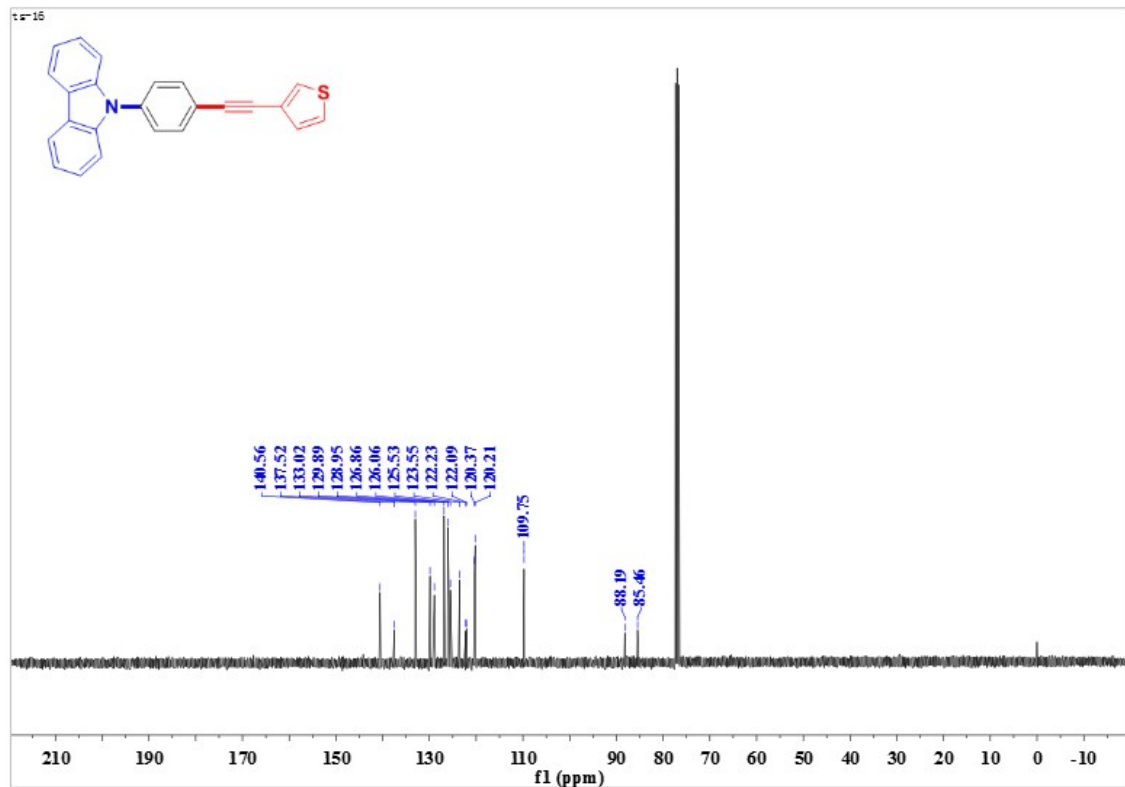

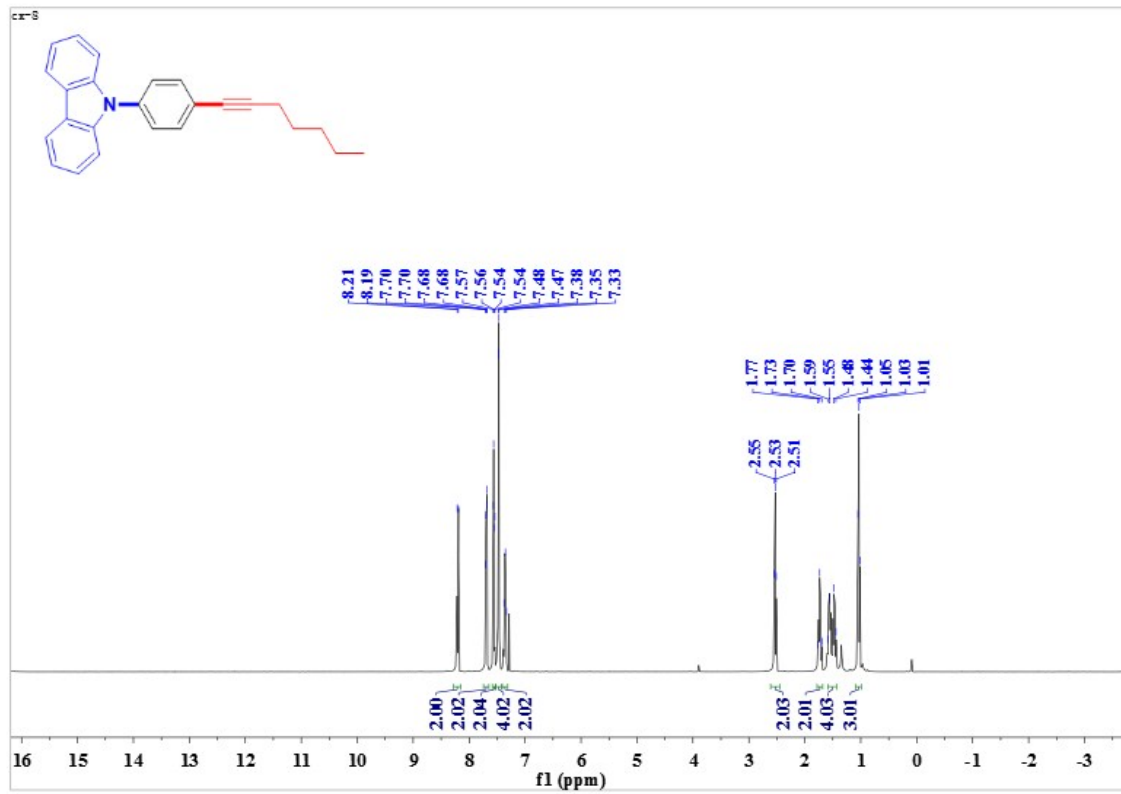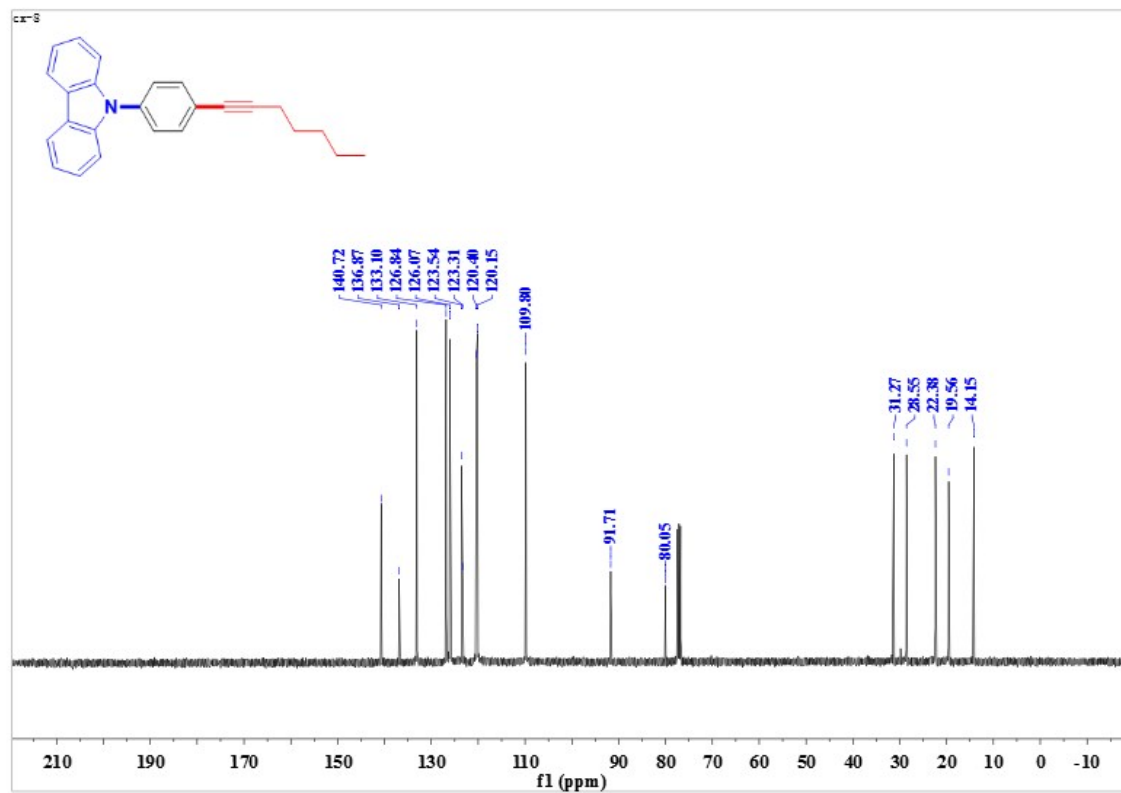

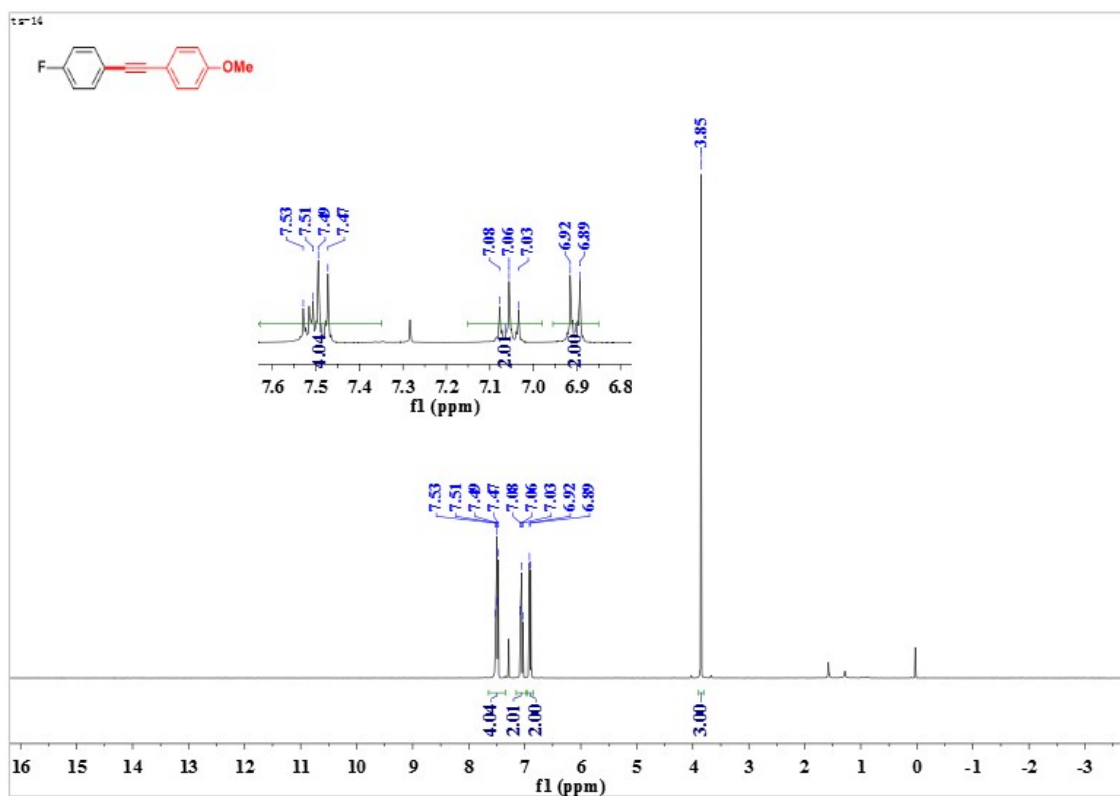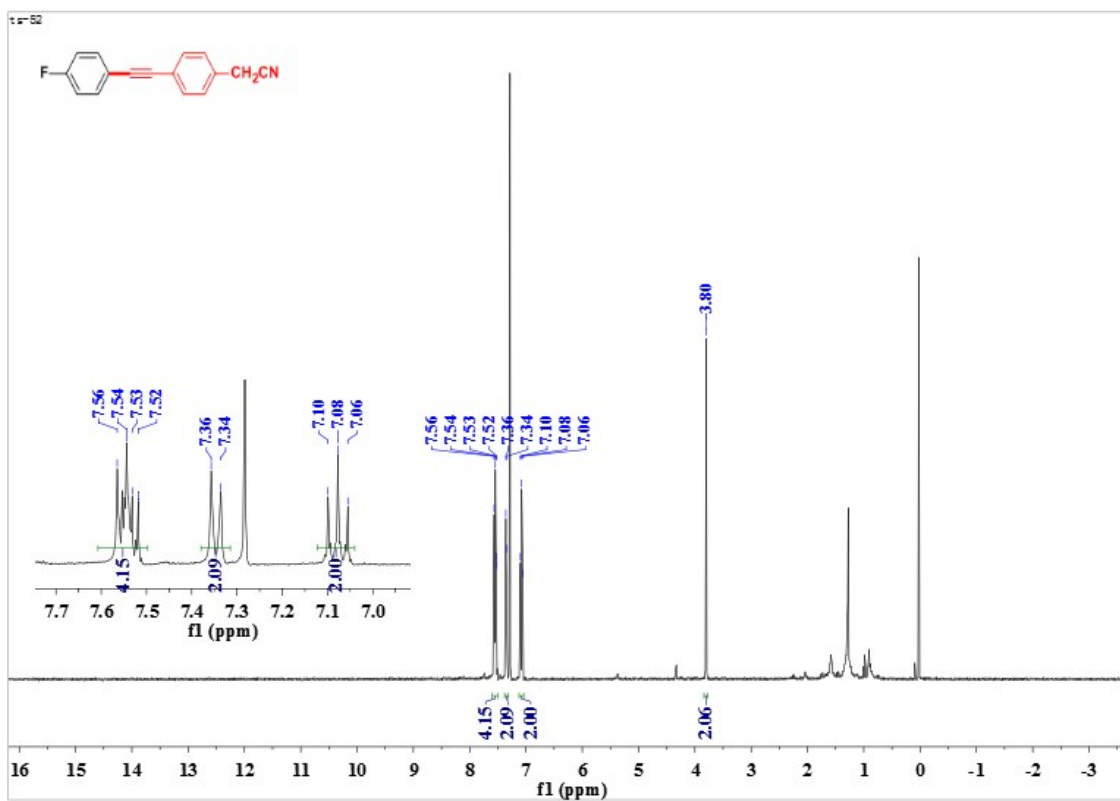

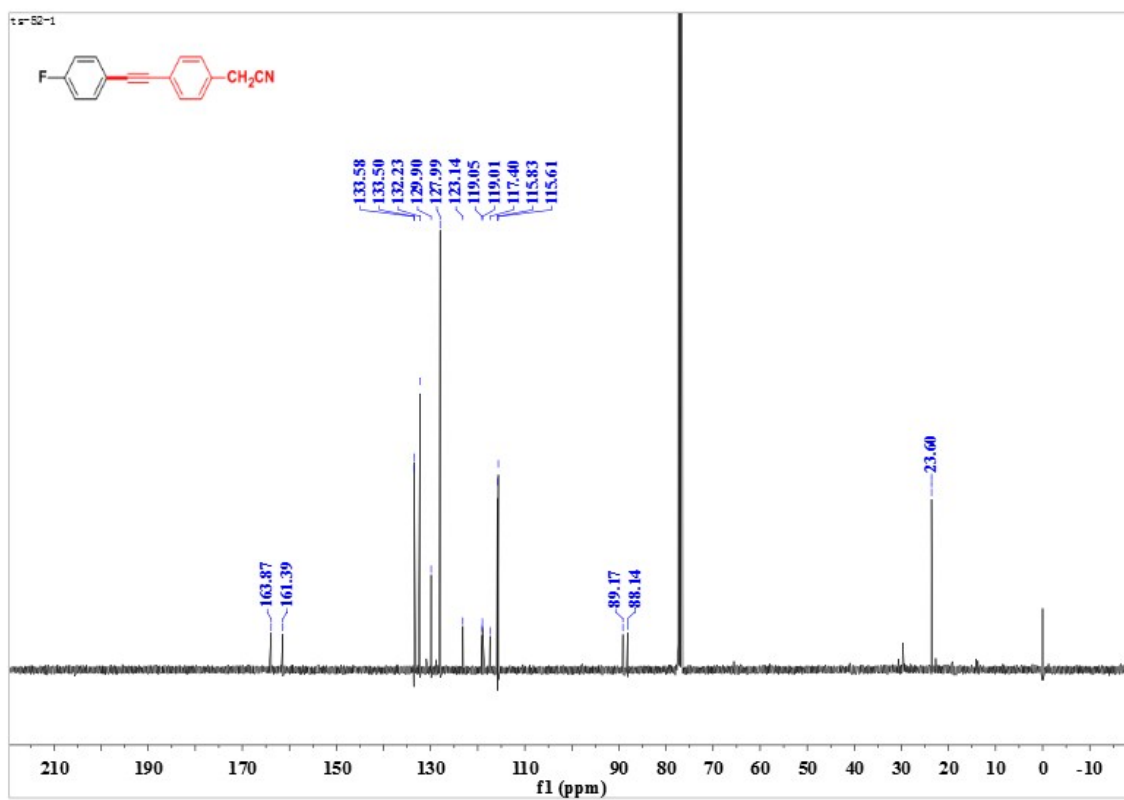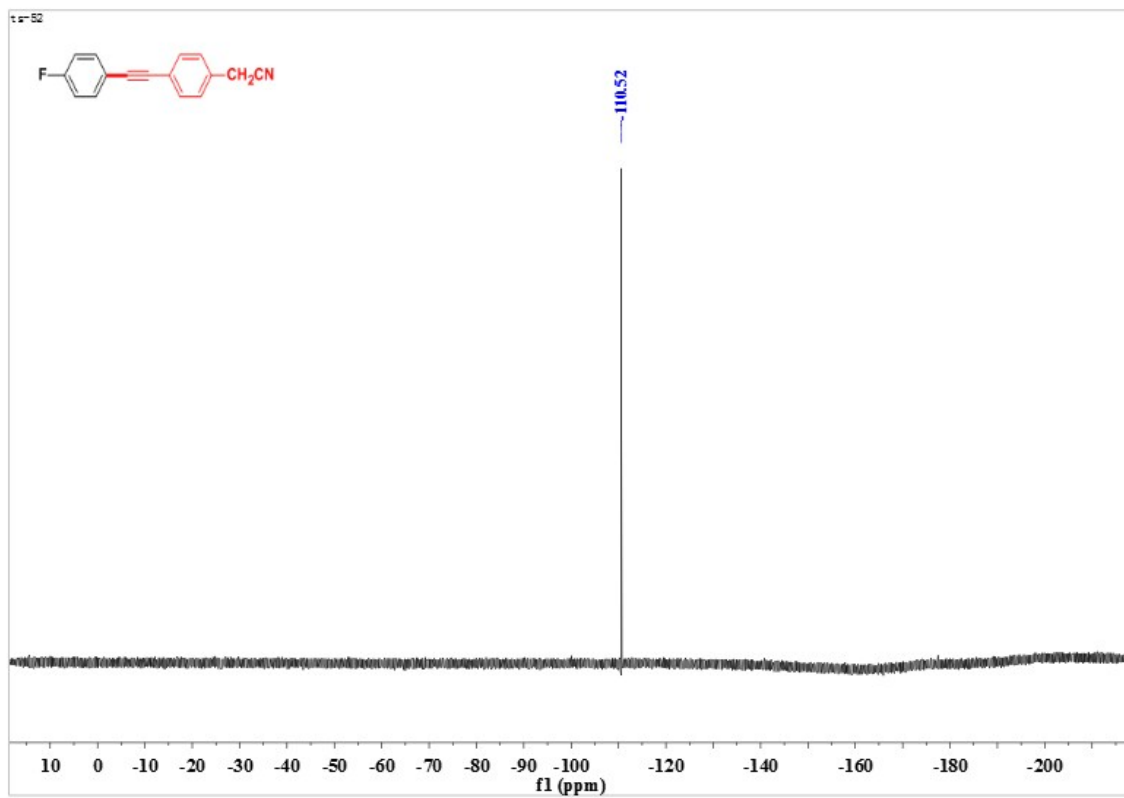

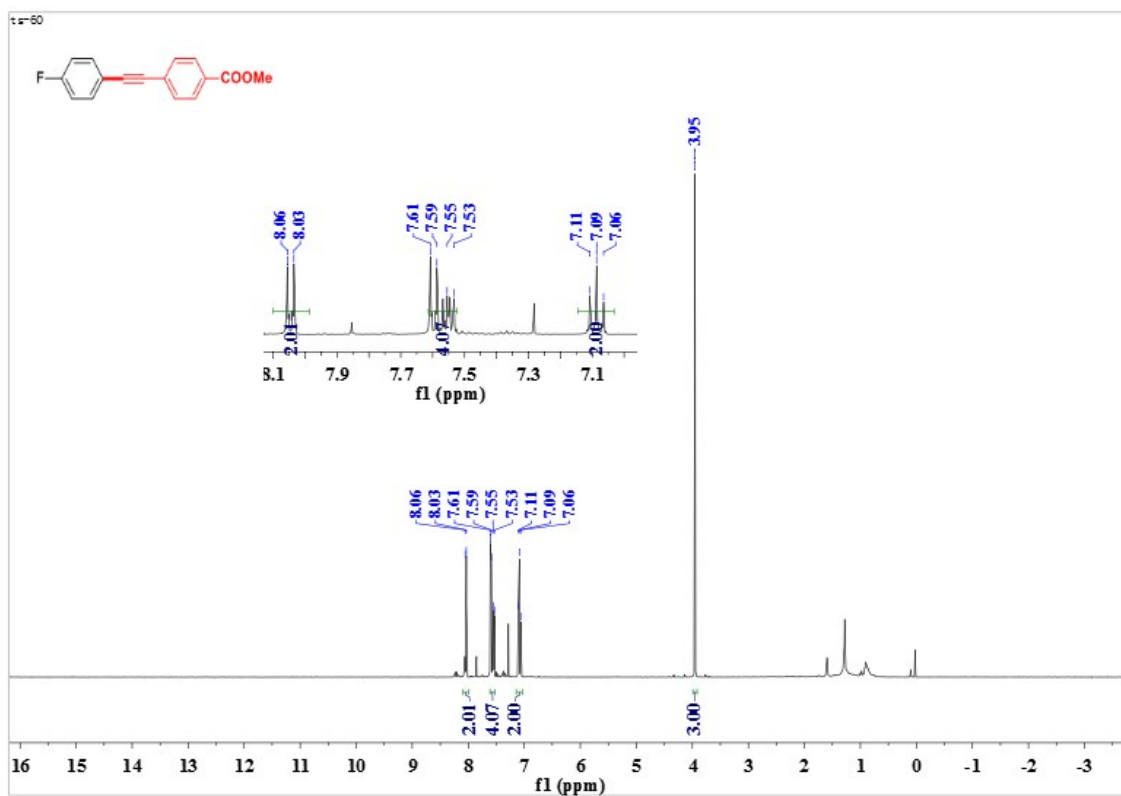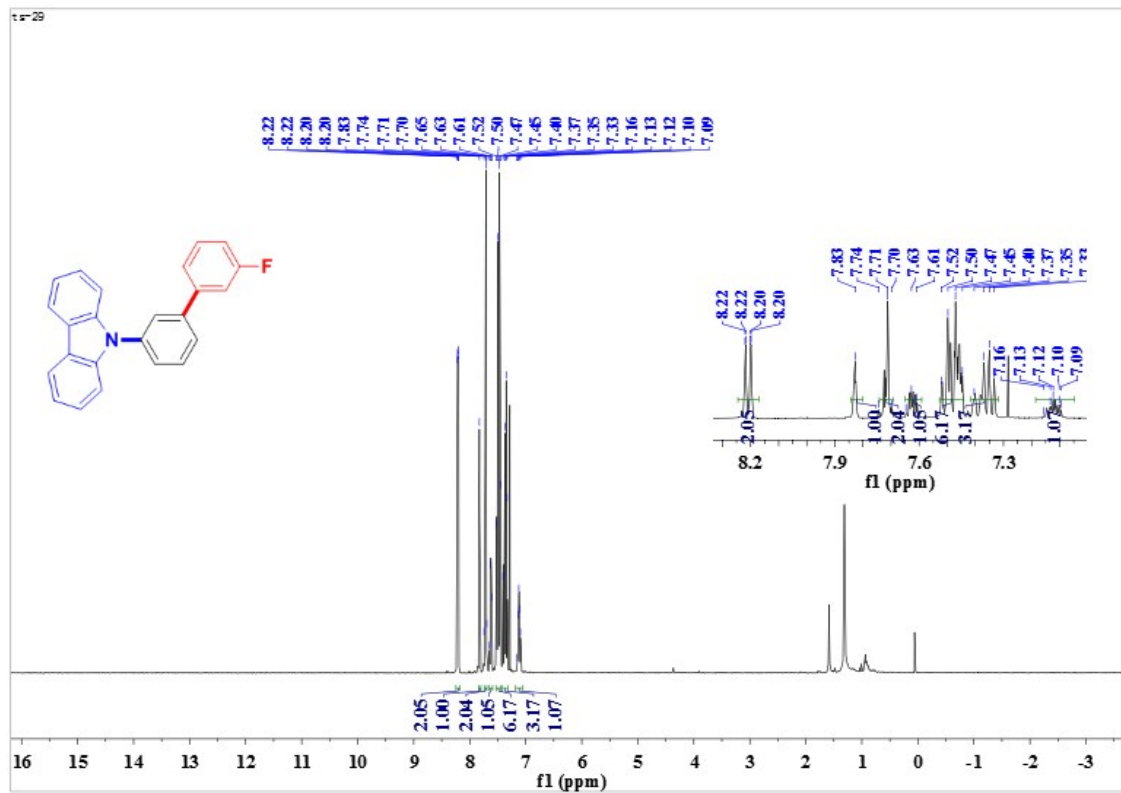

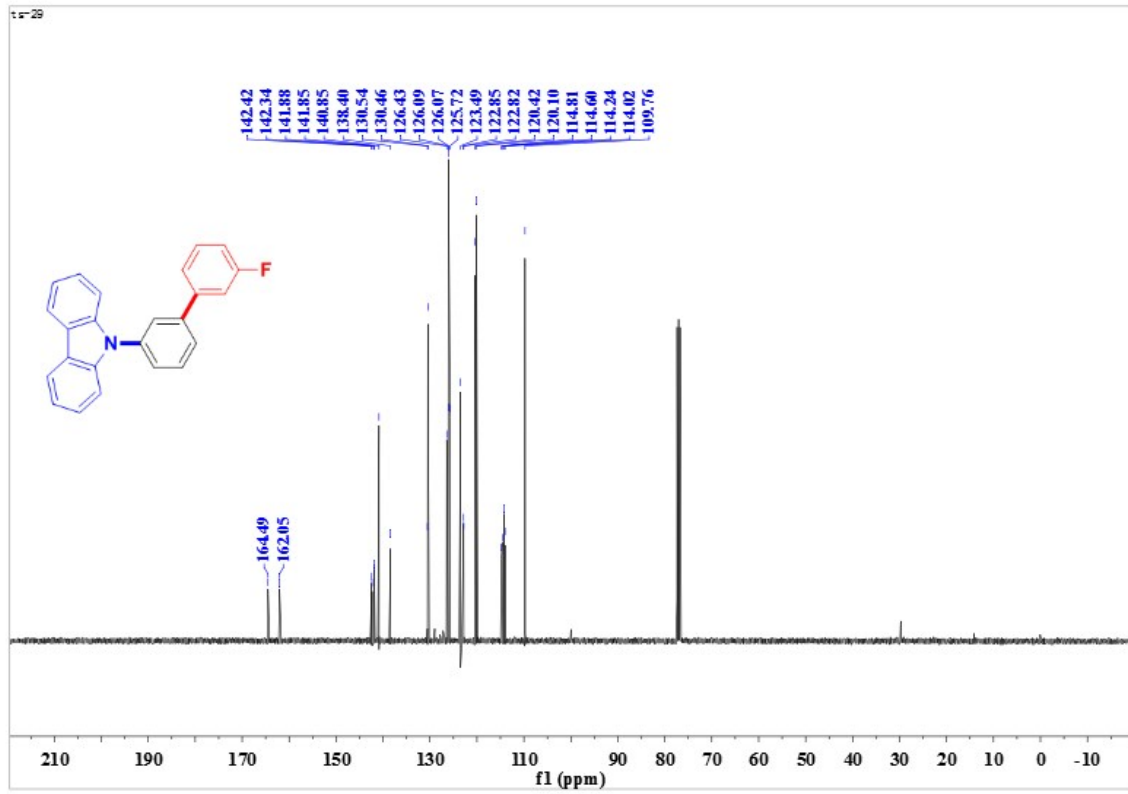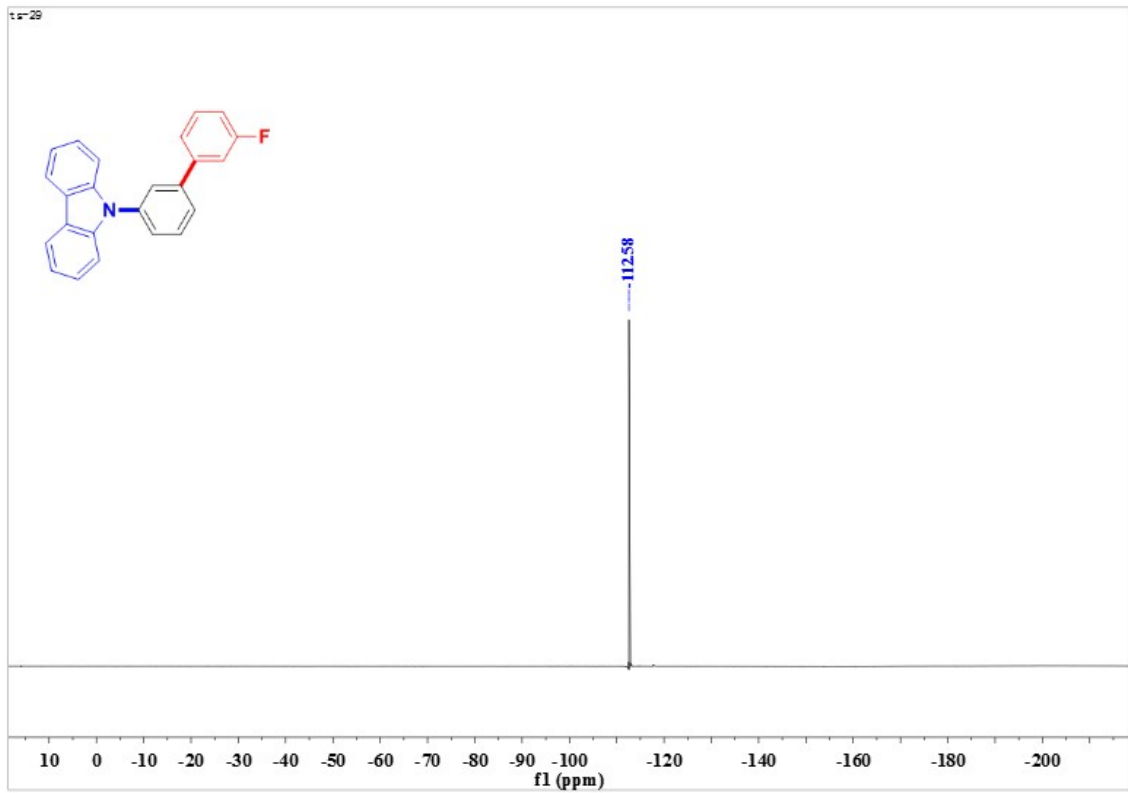



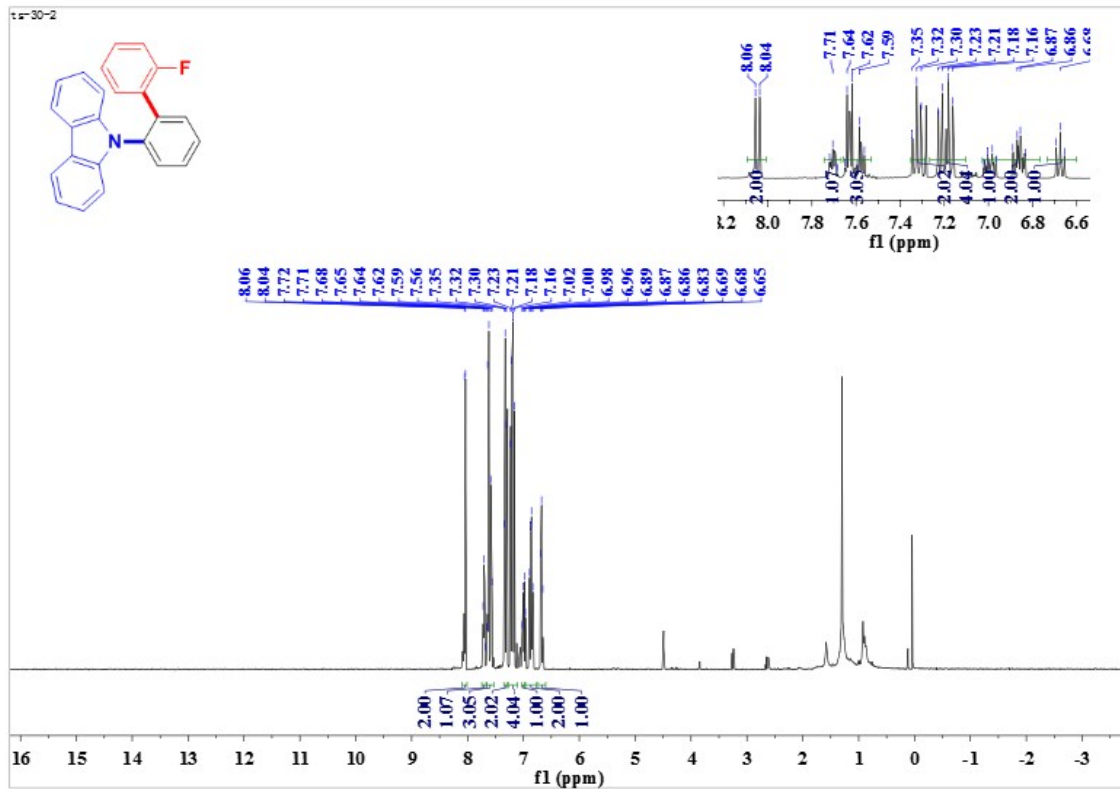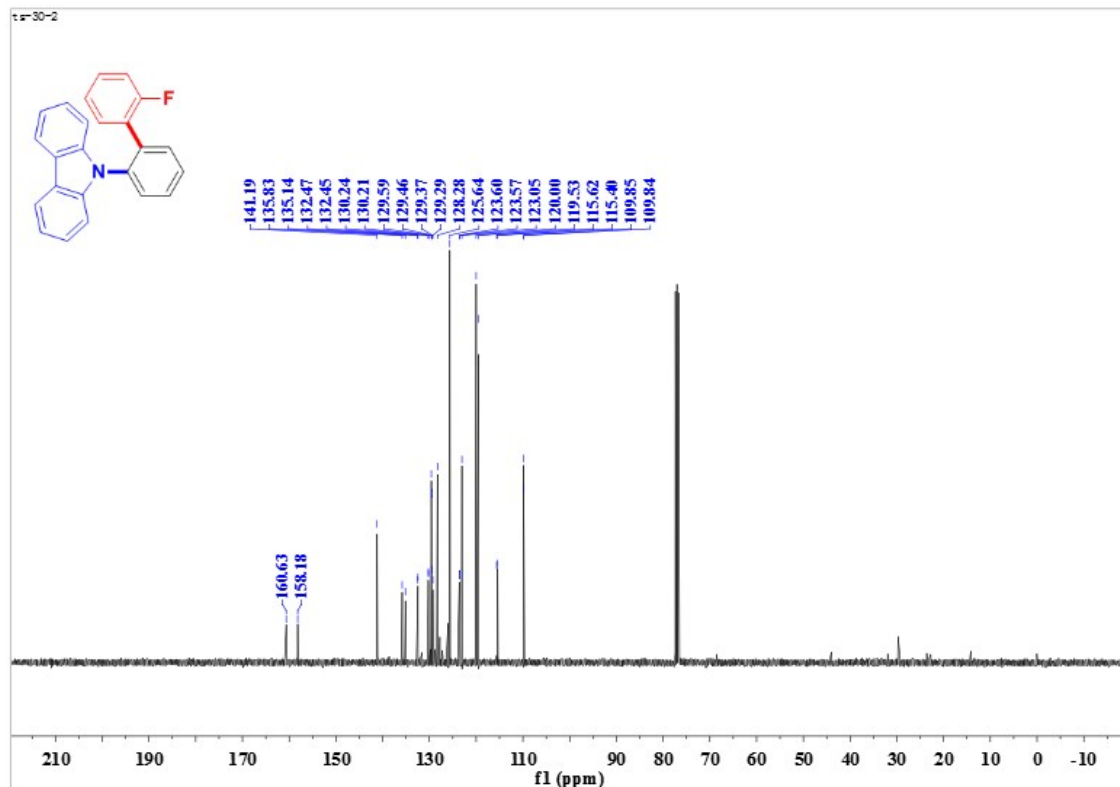

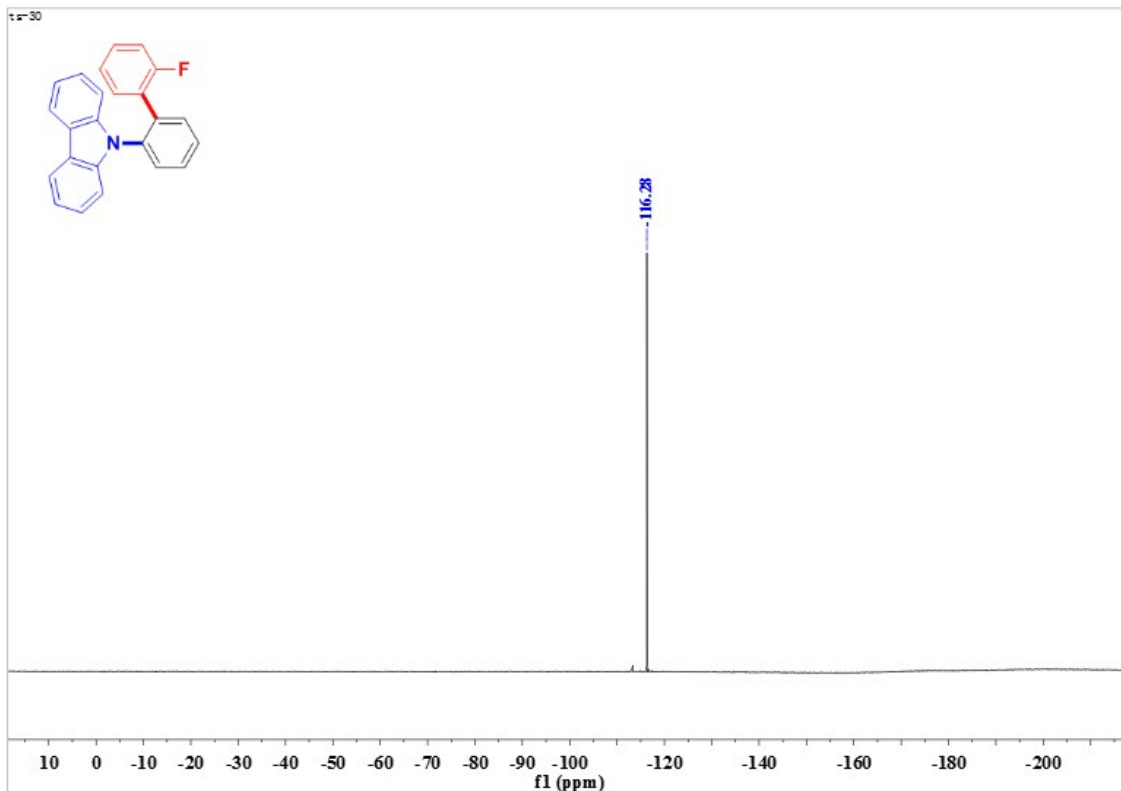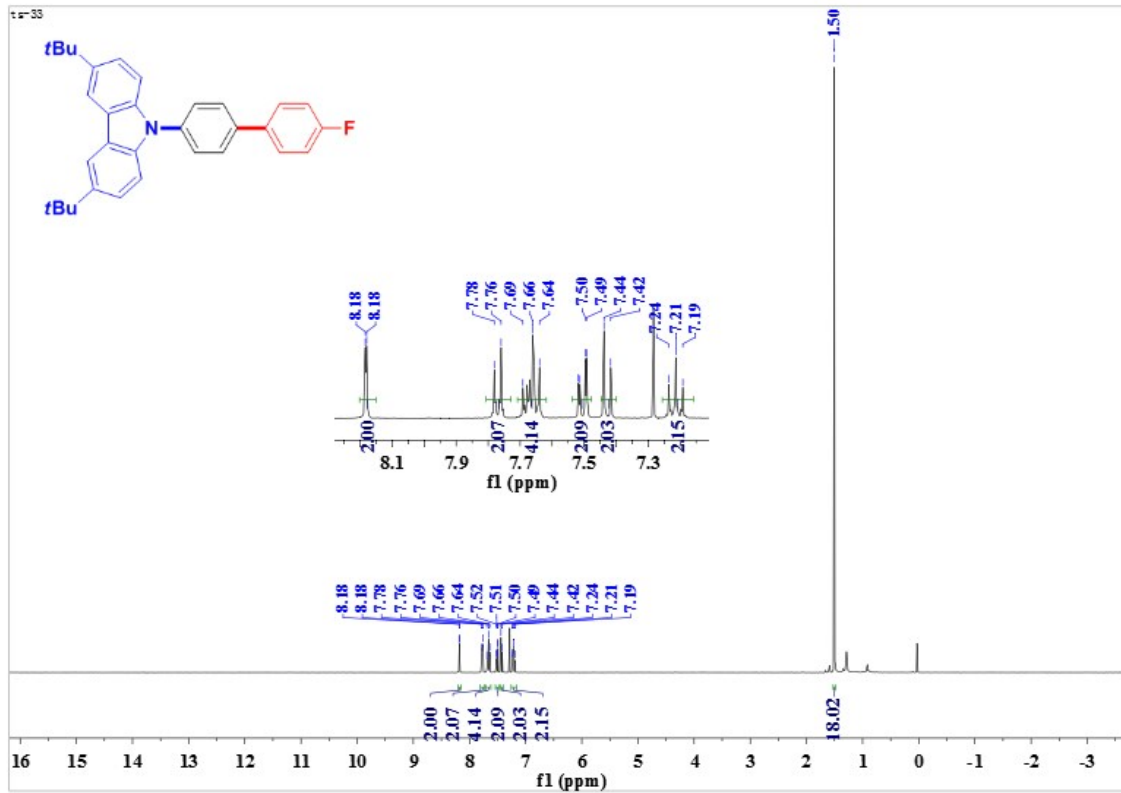

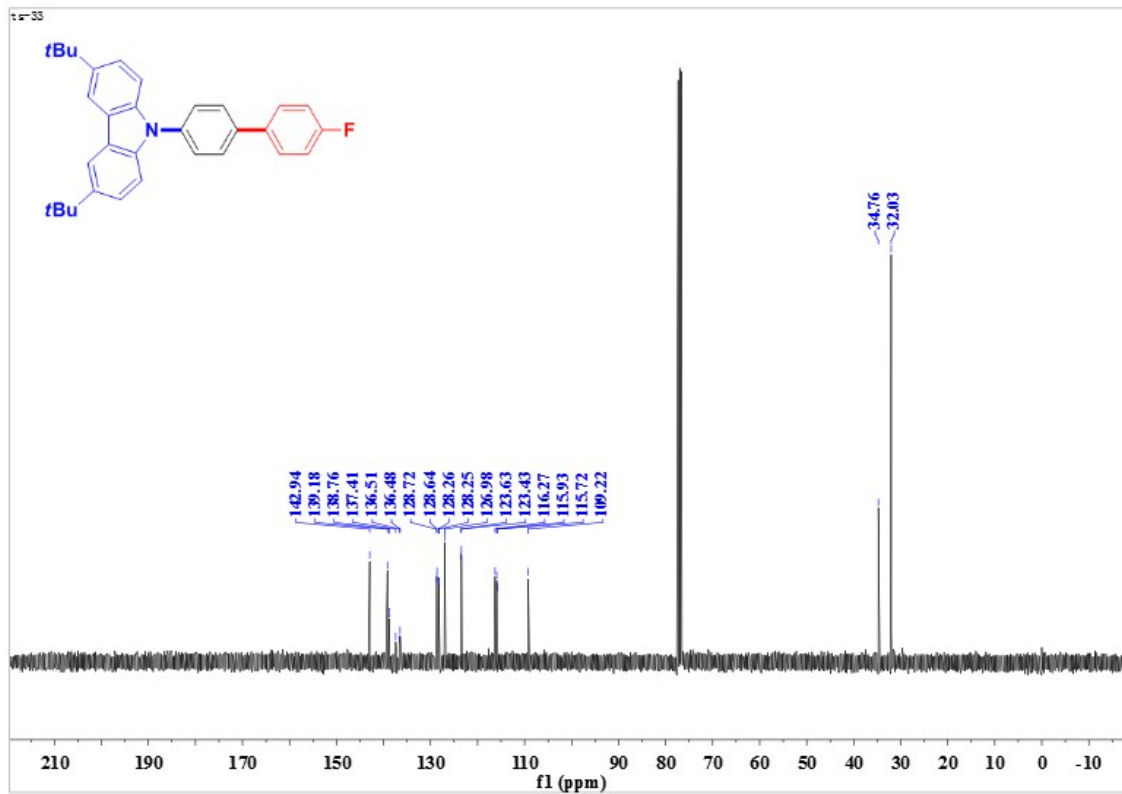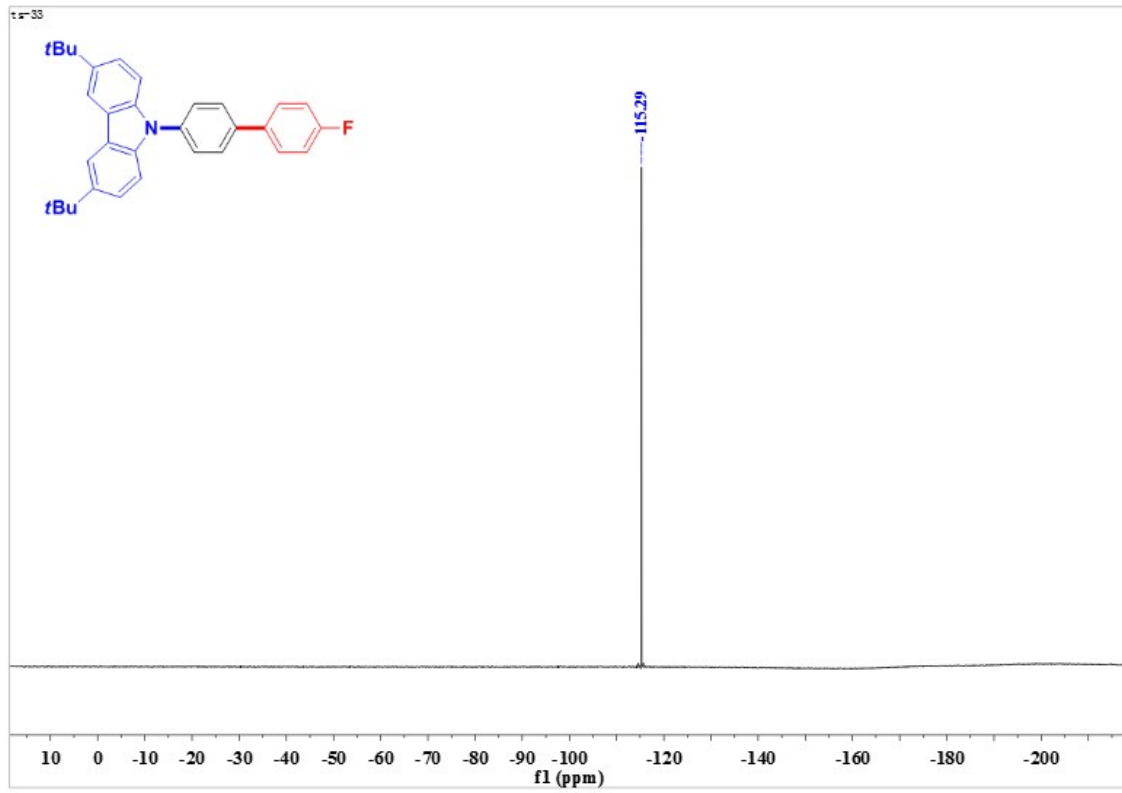

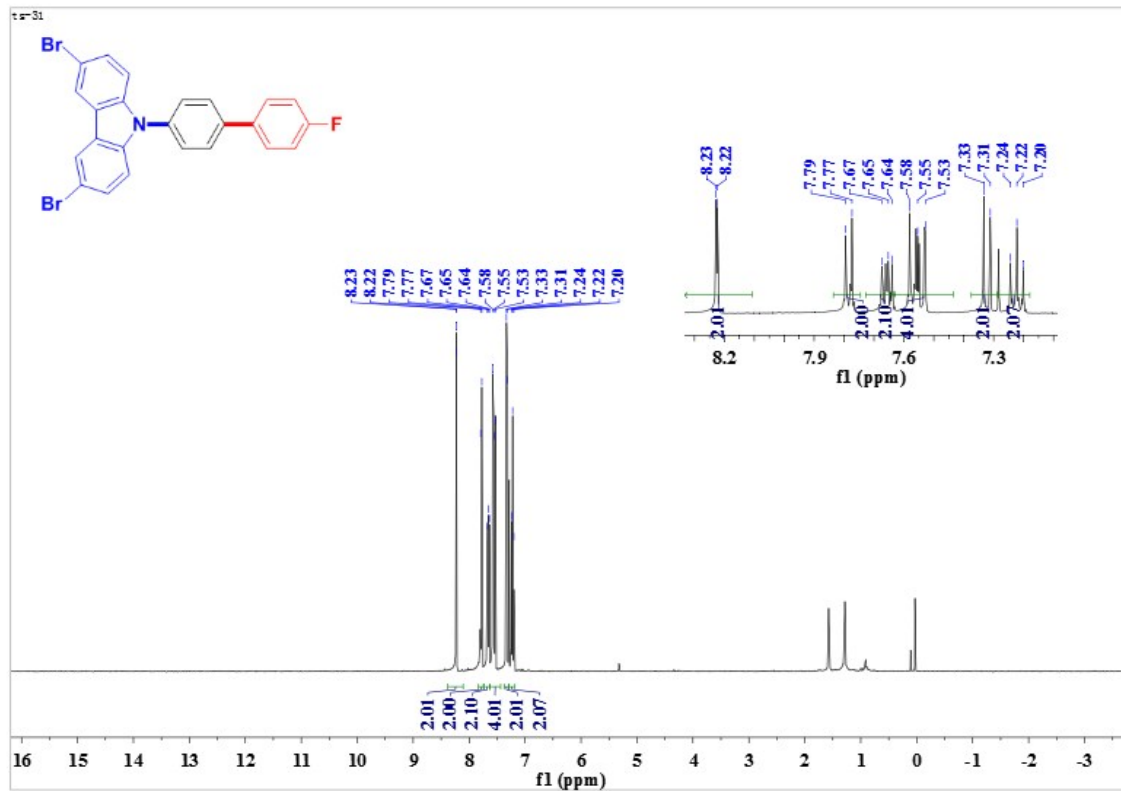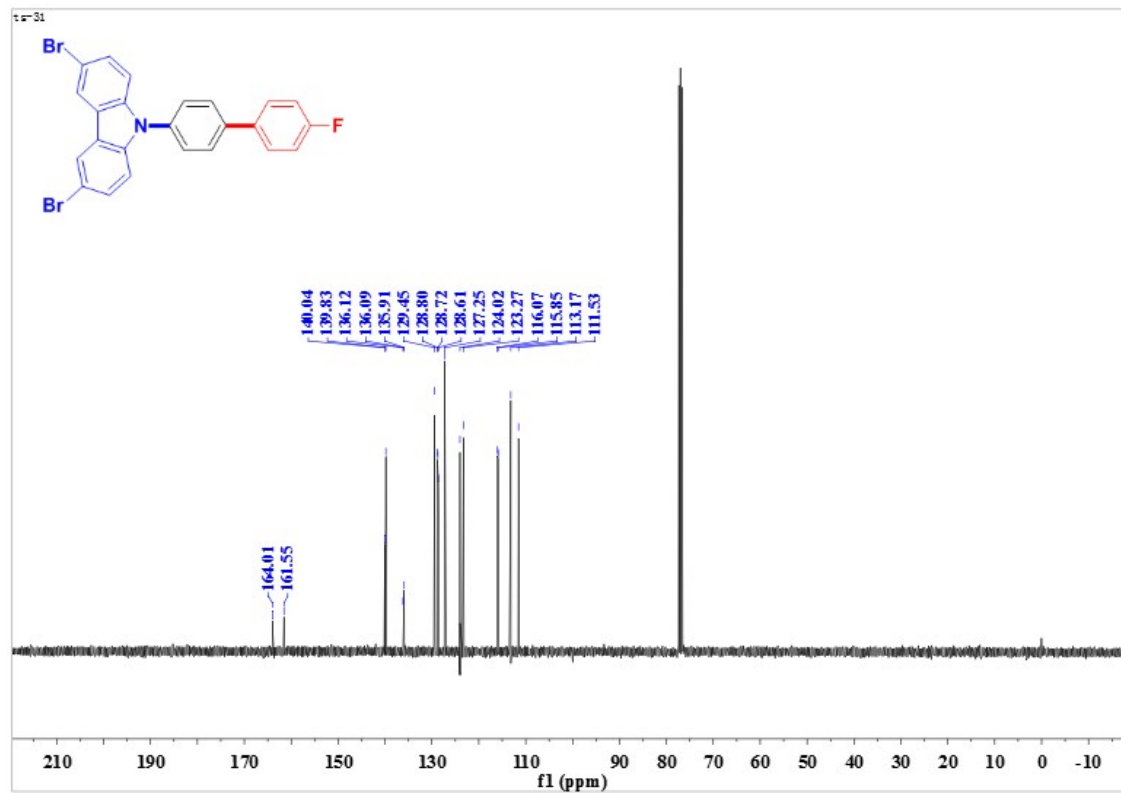

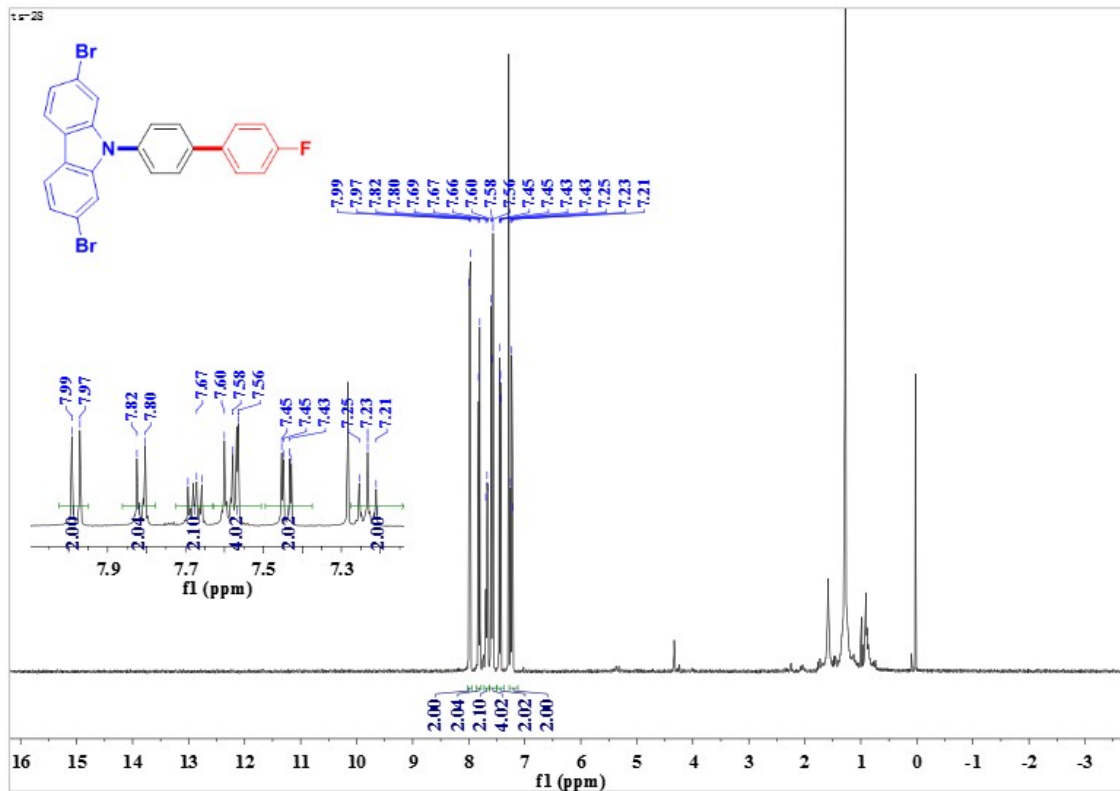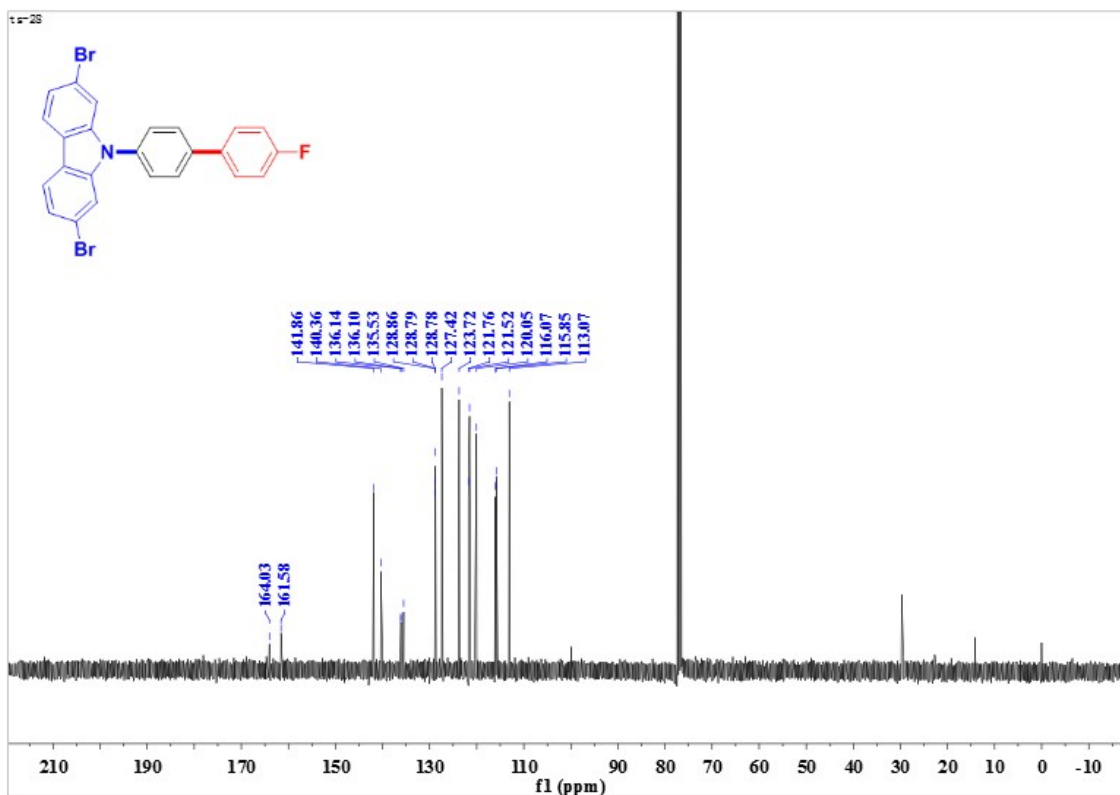

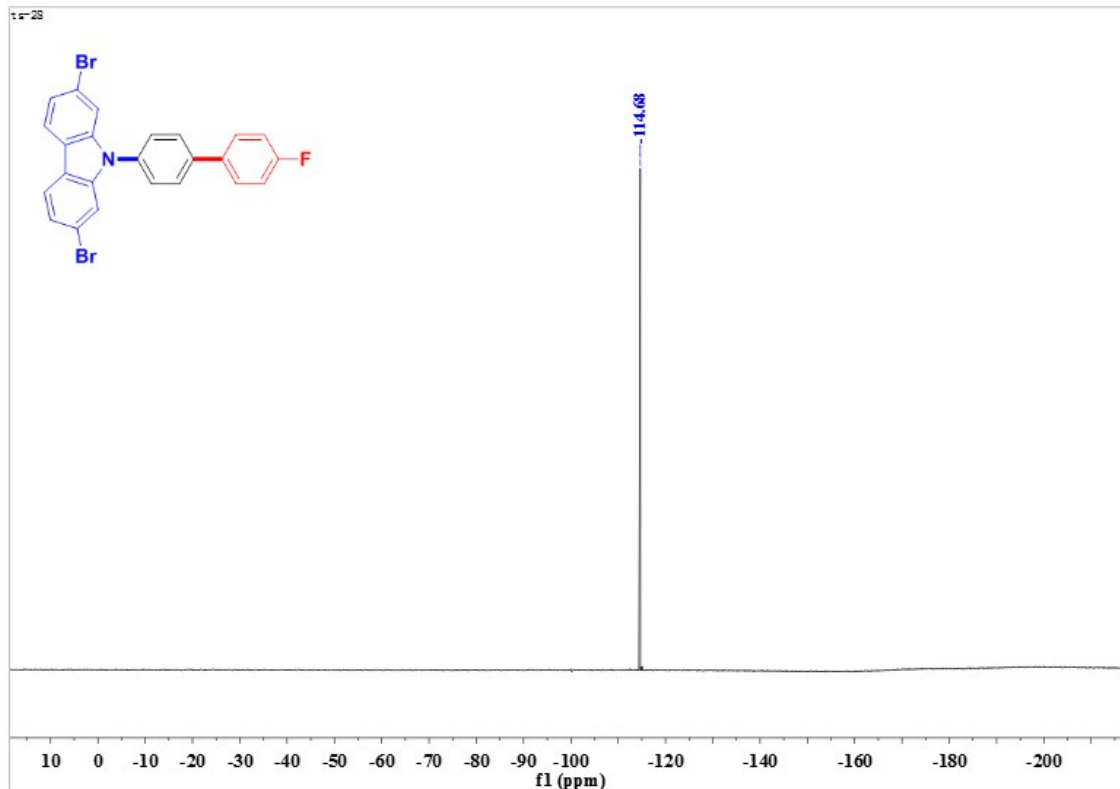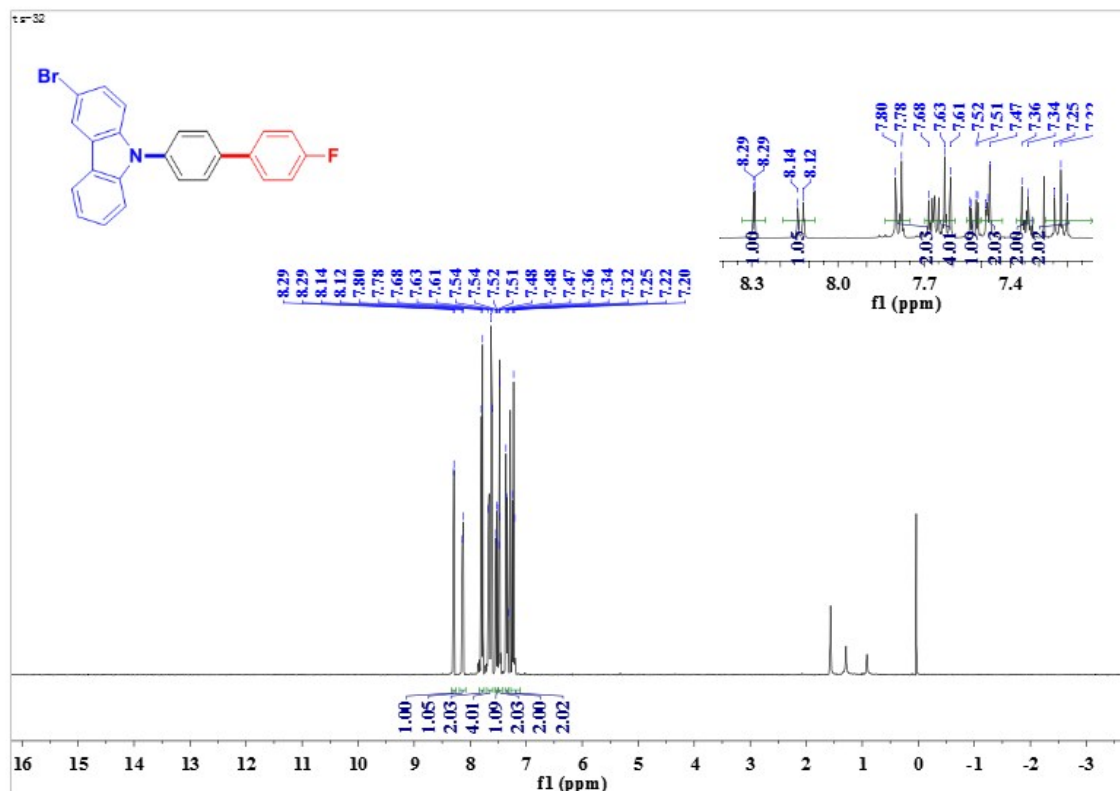

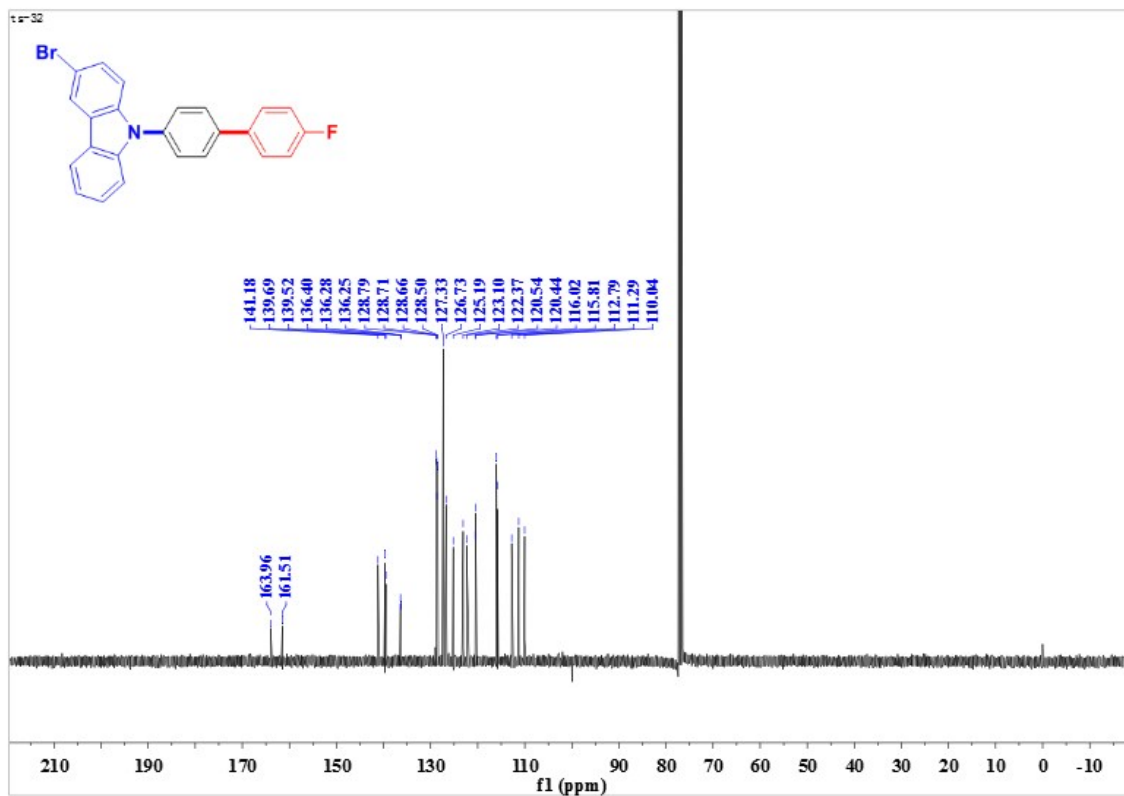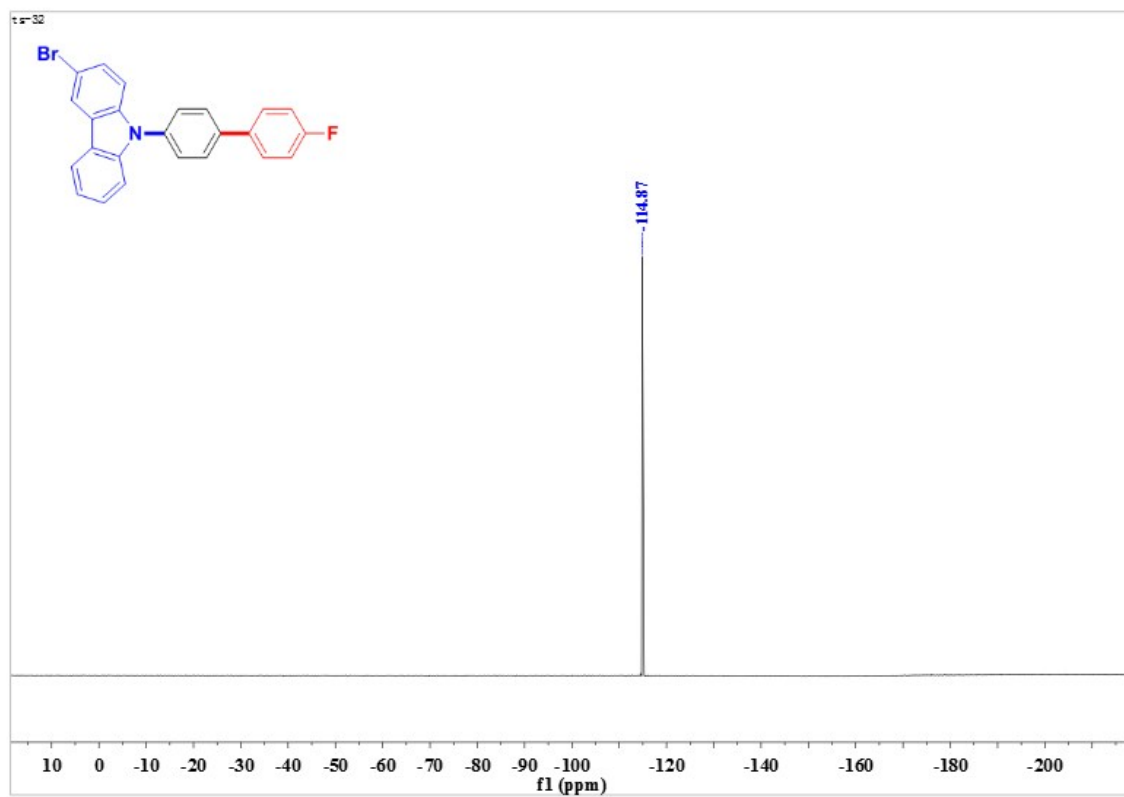

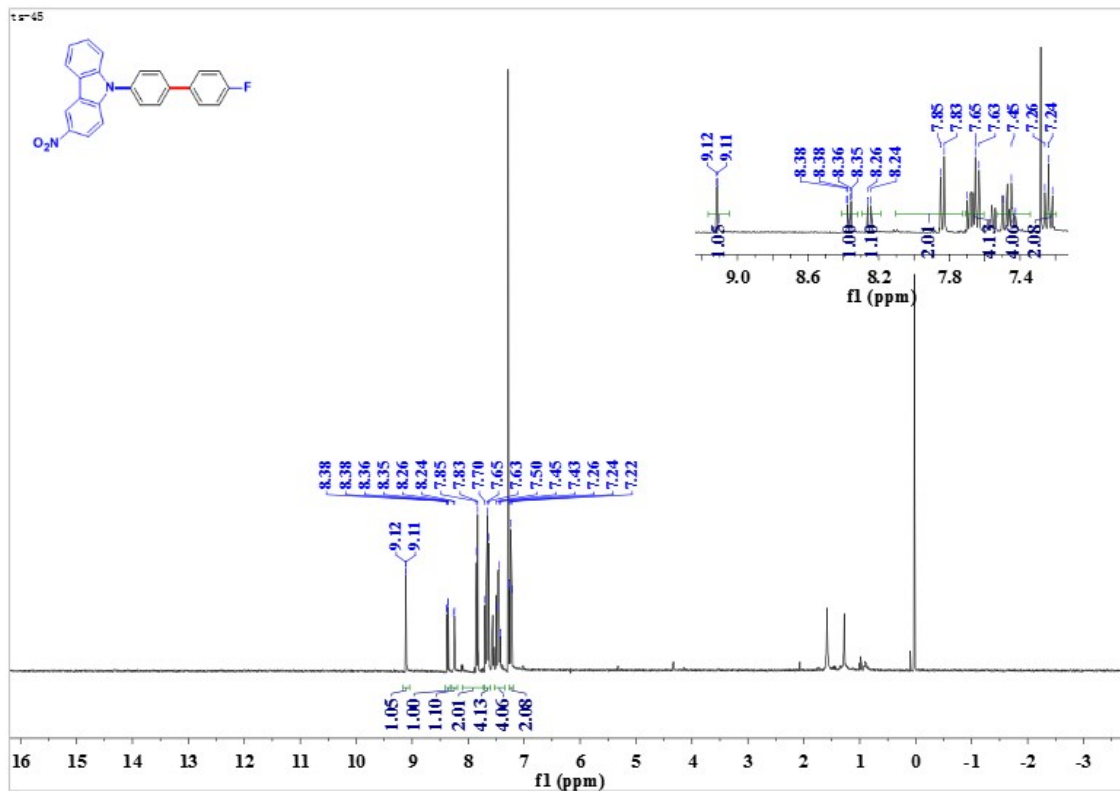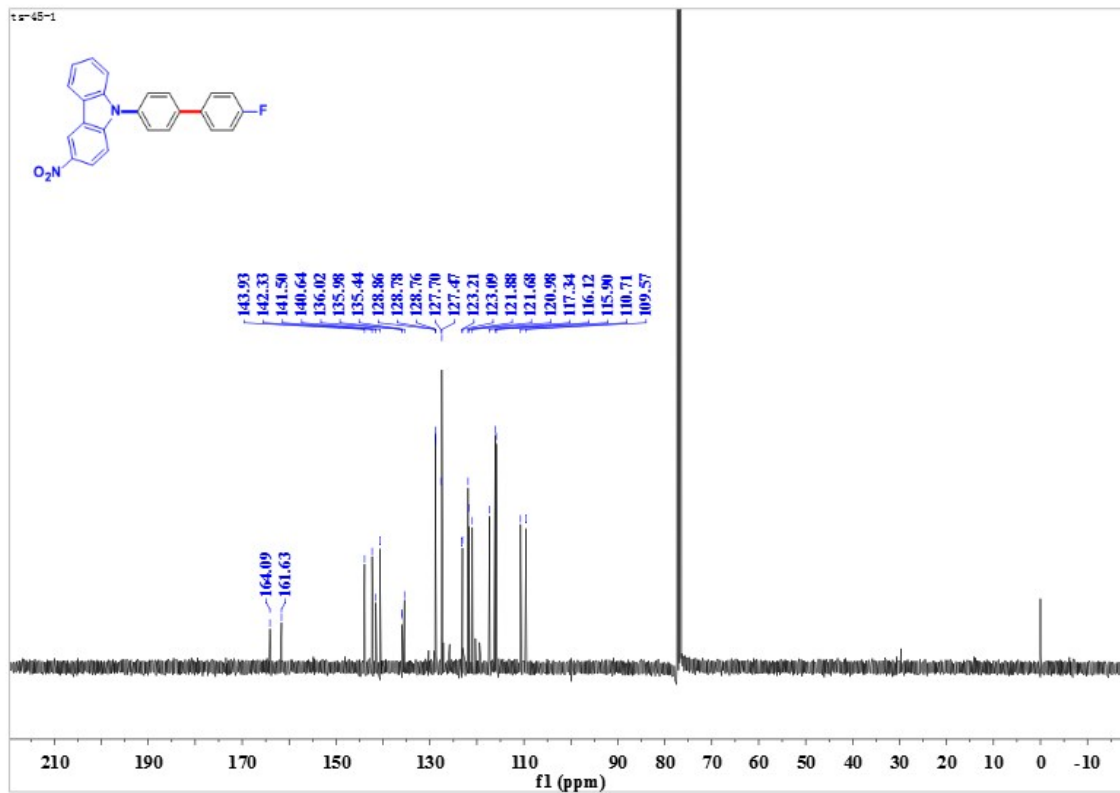



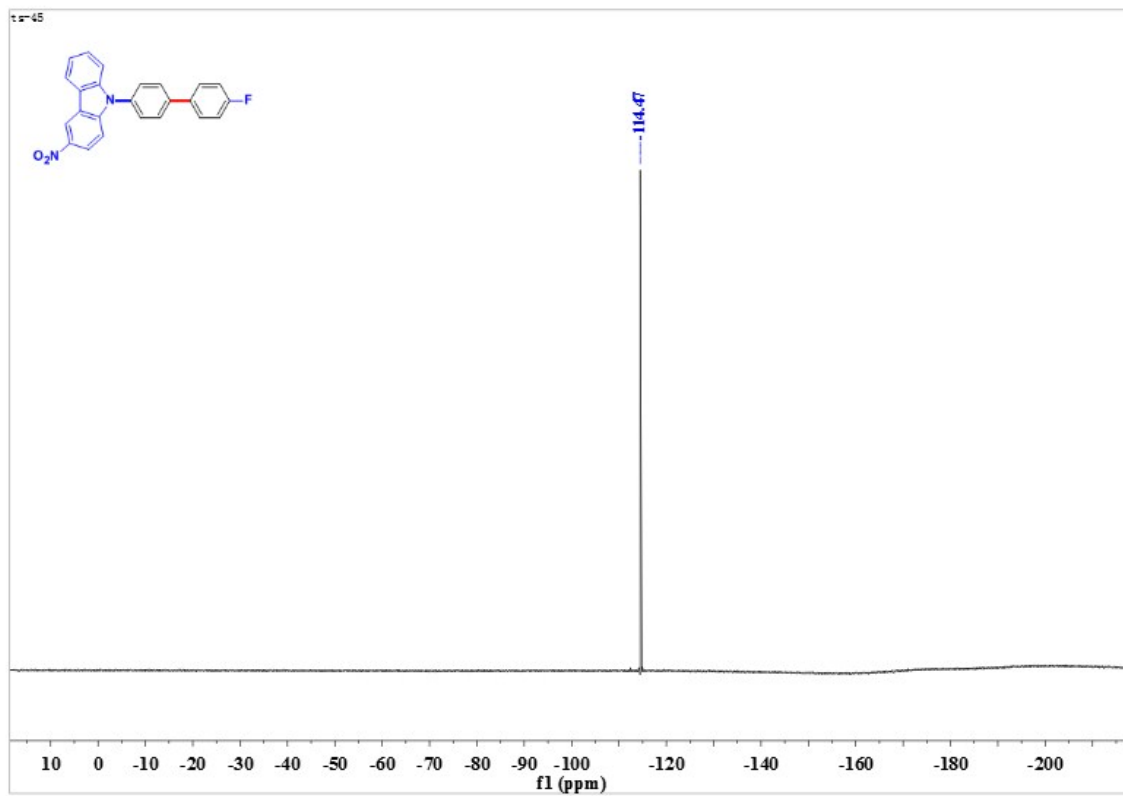

Supplement: c5ra26698j1.pdf [file c5ra26698j1.pdf]
